# Supplementary material for: Dynamics of human take and animal predation on sea turtle nests in Northwest Costa Rica
Source: PeerJ. 2022 Apr 26;10:e12925. doi: 10.7717/peerj.12925 (PMC9053298; doi:10.7717/peerj.12925)
Supplement: Supplemental Information 1 — Each row represents one nesting event [file peerj-10-12925-s001.xlsx]

## Sheet: Metadata
Column names	Date	Time	Sector	Zone	NestingEvent	Species	HatcheryLocation
Format/Explanation	month/day/year	hour:minute	Area of the beach (Northernmost sector= 1)	Section of beach (below median high tide line(1), above median high tide line(2), vegetation(3))	Nesting event (A = successful nest, SF = false crawl, S = illegally harvested, D = predated by animals, NA = aborted nest)		Grid location in hatchery
Examples	2012-08-11	21:45:00	2	3	A	LO	A5

## Sheet: CDO 2012
Date	Time	Sector	Zone	NestingEvent	Species	HatcheryLocation
2012-08-05	01:20:00	27	2	A	LO	Relocated
2012-08-05	21:45:00	2	3	A	LO	Relocated
2012-08-05	22:25:00	22	3	A	LO	Relocated
2012-08-07	02:52:00	19	3	SF	LO
2012-08-07	03:10:00	24	3	SF	LO
2012-08-08	22:50:00	34	3	SF	LO
2012-08-09	04:49:00	26	3	S	LO
2012-08-09	20:26:00	27	3	S	LO
2012-08-09	21:00:00	1	3	A	LO	A1
2012-08-10	20:30:00	12	3	A	LO	A3
2012-08-11	21:45:00	2	3	A	LO	A5
2012-08-11	22:30:00	7	3	A	LO	A7
2012-08-12	07:30:00	25	2	A	LO	A9
2012-08-12	21:26:00	12	2	A	LO	A11
2012-08-12	21:57:00	9	2	A	LO	A13
2012-08-12	23:00:00	21	3	A	LO	B2
2012-08-13	00:05:00	5	3	A	LO	B4
2012-08-13	00:30:00	5	3	A	LO	B6
2012-08-13	22:37:00	2	3	A	LO	B8
2012-08-13	23:00:00	1	2	A	LO	B10
2012-08-13	23:37:00	3	2	A	LO	B12
2012-08-14	00:20:00	8	2	SF	LO
2012-08-14	00:35:00	12	2	SF	LO
2012-08-14	07:30:00	4	3	S	LO
2012-08-14	07:33:00	4	3	S	LO
2012-08-14	07:36:00	2	2	A	LO	C1
2012-08-14	22:55:00	16	3	S	LO
2012-08-14	23:19:00	4	3	S	LO
2012-08-15	00:10:00	15	3	SF	LO
2012-08-15	00:32:00	18	3	A	LO	C3
2012-08-15	01:20:00	22	2	A	LO	C5
2012-08-15	03:52:00	4	3	A	LO	C7
2012-08-15	04:20:00	3	3	A	LO	C9
2012-08-15	04:21:00	4	3	A	LO	C11
2012-08-15	06:02:00	25	3	S	LO
2012-08-15	22:15:00	2	3	NA	LO
2012-08-15	23:30:00	23	2	A	LO	C13
2012-08-16	04:42:00	12	3	S	LO
2012-08-16	05:30:00	22	3	SF	LO
2012-08-16	22:40:00	7	3	SF	LO
2012-08-16	23:35:00	16	3	A	LO	D2
2012-08-17	00:00:00	17	3	NA	LO
2012-08-17	23:20:00	6	2	A	LO	D4
2012-08-18	00:40:00	22	3	S	LO
2012-08-18	01:10:00	22	3	NA	LO
2012-08-18	04:35:00	19	3	S	LO
2012-08-18	04:40:00	18	2	SF	LO
2012-08-18	04:45:00	16	2	S	LO
2012-08-18	04:50:00	8	3	S	LO
2012-08-19	01:00:00	10	3	A/Sq	LO	D6
2012-08-19	04:50:00	8	3	S	LO
2012-08-19	05:10:00	5	3	NA	LO
2012-08-20	00:30:00	4	3	A	LO	D8
2012-08-20	01:30:00	17	3	A	LO	D10
2012-08-20	02:00:00	20	3	A	LO	D12
2012-08-20	04:32:00	1	3	A	LO	E1
2012-08-20	05:54:00	24	2	S	LO
2012-08-20	20:40:00	3	2	A	LO	E3
2012-08-20	21:27:00	12	3	A	LO	E5
2012-08-20	22:07:00	17	3	A	LO	E7
2012-08-21	20:15:00	11	2	A	LO	E9
2012-08-21	21:00:00	18	2	S	LO
2012-08-22	03:57:00	23	3	SF	LO
2012-08-23	03:34:00	3	3	S	LO
2012-08-23	21:34:00	7	3	S	LO
2012-08-24	04:02:00	20	3	SF	LO
2012-08-24	04:23:00	19	3	SF	LO
2012-08-24	04:30:00	17	2	A	LO	E11
2012-08-25	05:15:00	38	3	A	LO	E13
2012-08-25	05:20:00	38	3	S	LO
2012-08-25	05:21:00	41	3	S	LO
2012-08-25	05:23:00	43	3	S	LO
2012-08-25	22:30:00	12	2	S	LO
2012-08-25	22:45:00	6	2	S	LO
2012-08-25	23:00:00	3	2	SF	LO
2012-08-25	23:15:00	2	2	S	LO
2012-08-25	23:25:00	6	2	S	LO
2012-08-28	08:15:00	2	3	A	LO	F2
2012-08-28	21:17:00	5	2	A	LO	F4
2012-08-28	21:48:00	4	3	A	LO	F6
2012-08-31	04:01:00	21	3	A	LO	F8
2012-08-31	23:29:00	26	2	S	LO
2012-09-01	23:45:00	22	3	S	LO
2012-09-02	00:00:00	19	3	S	LO
2012-09-02	00:03:00	32	3	SF	LO
2012-09-02	00:20:00	27	3	A	LO	F10
2012-09-02	00:30:00	1	3	S	LO
2012-09-02	04:30:00	2	3	S	LO
2012-09-03	19:28:00	11	2	A	LO	F12
2012-09-03	20:02:00	10	3	S	LO
2012-09-03	20:18:00	5	3	S	LO
2012-09-04	19:15:00	18	2	A	LO	G5
2012-09-04	19:40:00	10	3	A	LO	G3
2012-09-04	20:17:00	38	2	A	LO	G1
2012-09-09	04:59:00	22	2	S	LO
2012-09-09	05:02:00	23	2	S	LO
2012-09-10	04:18:00	27	2	A	LO	G7
2012-09-10	22:28:00	23	2	A	LO	G9
2012-09-11	04:36:00	33	2	A	LO	G11
2012-09-11	05:14:00	17	2	S	LO
2012-09-11	05:27:00	17	3	S	LO
2012-09-11	22:10:00	4	3	A	LO	G13
2012-09-11	22:25:00	36	1	NA	LO
2012-09-12	04:37:00	38	2	A	LO	H4
2012-09-12	04:50:00	44	3	S	LO
2012-09-12	05:10:00	26	3	A	LO	H2
2012-09-13	02:51:00	8	3	A	LO	A2
2012-09-13	03:03:00	4	2	A	LO	H12
2012-09-13	03:34:00	9	3	A	LO	H10
2012-09-13	04:37:00	12	2	A	LO	H8
2012-09-13	05:02:00	18	2	A	LO	H6
2012-09-13	22:45:00	23	2	S	LO
2012-09-14	03:44:00	5	2	A	LO	A4
2012-09-14	05:09:00	22	2	S	LO
2012-09-14	05:17:00	26	2	S	LO
2012-09-14	05:51:00	11	2	S	LO
2012-09-14	05:54:00	9	3	S	LO
2012-09-15	04:22:00	11	3	S	LO
2012-09-15	04:30:00	26	2	S	LO
2012-09-16	04:36:00	37	2	S	LO
2012-09-16	23:17:00	25	2	SF	LO
2012-09-17	00:02:00	1	2	A	LO	A8
2012-09-17	00:28:00	1	2	A	LO	A6
2012-09-17	00:40:00	33	3	SF	LO
2012-09-17	01:12:00	23	2	A	LO	A10
2012-09-17	01:30:00	23	3	A	LO	A12
2012-09-19	00:54:00	10	3	A	LO	B1
2012-09-19	02:07:00	4	3	A	LO	B3
2012-09-19	02:56:00	21	3	A	LO	B5
2012-09-21	21:37:00	7	3	A	LO	B7
2012-09-22	04:20:00	14	2	A	LO	B9
2012-09-24	03:52:00	16	2	A	LO	B11
2012-09-24	19:05:00	17	3	D	LO
2012-09-25	00:36:00	1	2	A	LO	C2
2012-09-25	01:15:00	21	2	A	LO	B13
2012-09-26	01:14:00	7	3	S	LO
2012-09-26	01:43:00	4	2	SF	LO
2012-09-27	03:13:00	17	2	A	LO	C4
2012-09-28	04:50:00	9	3	S	LO
2012-09-28	05:20:00	19	2	SF
2012-09-28	11:15:00	30	3	D	LO
2012-09-29	03:32:00	21	3	S	LO
2012-09-29	03:40:00	23	2	A	LO	C6
2012-09-29	03:42:00	16	3	S	LO
2012-09-29	03:55:00	11	3	S	LO
2012-09-29	04:20:00	3	3	S	LO
2012-09-29	04:30:00	1	2	S	LO
2012-09-29	12:15:00	21	3	D	LO
2012-09-30	00:43:00	9	3	A	LO	C8
2012-10-01	00:37:00	21	2	A	LO	D1
2012-10-01	23:15:00	21	3	A	LO	C12
2012-10-01	23:50:00	16	2	A	LO	C10
2012-10-02	01:08:00	26	2	A	LO	D3
2012-10-03	04:05:00	21	3	SF	LO
2012-10-04	02:26:00	21	2	A	LO	D11/ D13
2012-10-04	03:17:00	4	2	A	LO	D5
2012-10-05	02:55:00	14	2	A	LO	D9
2012-10-05	22:03:00	10	2	S	LO
2012-10-07	03:28:00	17	2	S	LO
2012-10-07	03:34:00	16	3	S	LO
2012-10-07	03:44:00	12	2	S	LO
2012-10-07	04:13:00	1	2	S	LO
2012-10-08	04:29:00	1	2	SF	LO
2012-10-08	04:57:00	33	3	S	LO
2012-10-08	05:04:00	34	3	S	LO
2012-10-08	05:22:00	35	3	S	LO
2012-10-08	20:02:00	15	3	S	LO
2012-10-08	20:32:00	8	2	SF	LO
2012-10-08	21:29:00	3	2	A	LO	E2
2012-10-08	22:23:00	7	2	A	LO	E4
2012-10-08	22:50:00	11	2	A	LO	E6
2012-10-08	23:11:00	16	3	S	LO
2012-10-08	23:37:00	20	2	SF	LO
2012-10-09	05:57:00	35	2	S	LO
2012-10-10	22:12:00	22	2	A	LO	E8
2012-10-10	22:29:00	14	2	A	LO
2012-10-11	00:05:00	22	2	A	LO	E12
2012-10-11	06:57:00	21	3	S	LO
2012-10-11	23:08:00	19	2	A	LO	F1
2012-10-12	00:15:00	6	2	S	LO
2012-10-12	05:30:00	30	3	S	LO
2012-10-12	06:20:00	2	3	S	LO
2012-10-12	06:29:00	10	2	S	LO
2012-10-13	06:07:00	1	2	S	LO
2012-10-13	06:17:00	8	2	S	LO
2012-10-13	23:41:00	20	2	A	LO	F5
2012-10-15	00:14:00	1	2	A	LO	F7
2012-10-15	04:05:00	18	2	A	LO	F9
2012-10-15	05:28:00	17	2	S	LO
2012-10-16	17:33:00	20	2	NA	LO
2012-10-17	00:50:00	16	2	NA	LO
2012-10-17	08:00:00	4	2	A	LO	F11
2012-10-17	08:15:00	3	3	A	LO	F13
2012-10-18	05:30:00	27	3	A	LO	G2
2012-10-19	03:12:00	16	2	NA	LO
2012-10-19	03:29:00	6	3	A	LO	G4
2012-10-19	03:51:00	4	3	A	LO	G6
2012-10-20	07:50:00	21	3	A	LO	G8
2012-10-20	19:30:00	21	3	A	LO	G8
2012-10-20	20:06:00	2	2	A	LO	G10
2012-10-21	04:46:00	2	3	S	LO
2012-10-21	05:04:00	11	3	S	LO
2012-10-22	22:00:00	6	2	A	LO	G12
2012-10-24	04:43:00	4	2	S	LO
2012-10-24	05:22:00	20	2	?	LO
2012-10-24	05:41:00	36	2	SF	LO
2012-10-25	00:15:00	8	3	A	LO	H3
2012-10-25	00:30:00	9	3	A	LO	E1
2012-10-25	01:20:00	4	2	A	LO	H5
2012-10-25	01:45:00	2	2	A	LO	H7
2012-10-27	23:08:00	2	3	A	LO
2012-10-31	01:33:00	6	2	SF	LO
2012-10-31	04:05:00	7	2	S	LO
2012-11-01	02:07:00	15	2	A	LO	H9
2012-11-02	01:43:00	16	2	S	LO
2012-11-02	01:58:00	14	2	S	LO
2012-11-03	01:22:00	17	2	A	LO
2012-11-03	01:47:00	9	2	S	LO
2012-11-03	08:40:00	23	2	S	LO
2012-11-03	19:45:00	4	2	A	LO	Relocated
2012-11-03	20:29:00	23	2	A	LO	Relocated
2012-11-06	06:07:00	21	2	A	LO
2012-11-06	23:57:00	13	2	S	LO
2012-11-07	00:27:00	4	2	A	LO
2012-11-07	00:41:00	14	2	A	LO	IS
2012-11-08	06:41:00	19	2	S	LO
2012-11-08	06:53:00	13	2	S	LO
2012-11-08	07:10:00	4	2	S	LO
2012-11-08	07:24:00	3	2	S	LO
2012-11-08	20:30:00	13	3	A	LO
2012-11-09	02:05:00	2	2	A	LO
2012-11-09	02:40:00	17	2	A	LO
2012-11-09	06:13:00	20	2	D	LO
2012-11-09	21:27:00	13	2	NA	LO
2012-11-09	22:19:00	4	2	A	LO	Relocated
2012-11-09	22:29:00	3	3	SF	LO
2012-11-09	22:44:00	3	2	S	LO
2012-11-10	06:03:00	8	2	S	LO
2012-11-10	06:32:00	3	1	S	LO
2012-11-10	23:30:00	19	2	A	LO
2012-11-11	05:30:00	17	2	S	LO
2012-11-11	05:41:00	8	2	S	LO
2012-11-15	00:37:00	3	2	S	LO
2012-11-15	00:40:00	4	2	S	LO
2012-11-15	00:44:00	7	2	SF	LO
2012-11-15	00:54:00	2	3	S	LO
2012-11-15	06:00:00	17	2	A	LO
2012-11-16	00:30:00	8	3	A	LO
2012-11-17	08:23:00	6	2	A	LO	IS
2012-11-18	20:40:00			A	LO
2012-11-20	06:49:00	11	2	S	LO
2012-11-20	21:56:00	40	2	A	LO
2012-11-20	22:26:00	38	2	S	LO
2012-11-21	21:50:00	23	2	A	LO
2012-11-21	22:30:00	2	2	SF	LO
2012-11-22	19:58:00	23	2	A	LO
2012-11-23	06:45:00	16	2	S	LO
2012-11-23	07:15:00	2	2	S	LO
2012-11-24	06:36:00	23	2	S	LO
2012-11-24	06:47:00	34	2	S	LO
2012-11-26	23:40:00	21	2	A	LO
2012-11-28	06:35:00	22	2	S	LO
2012-11-28	06:54:00	37	3	SF	LO

## Sheet: CDO 2013
Date	Time	Sector	Zone	NestingEvent	Species	HatcheryLocation
2013-07-15	20:50:00	1	2	A	LO	R
2013-07-22	23:21:00	3	2	A	LO	R
2013-07-26	01:09:00	18	3	SF	LO
2013-07-27	02:10:00	10	3	A	LO	R
2013-07-27	02:45:00	7	3	A	LO	R
2013-07-28	02:45:00	26	3	S	LO
2013-07-28	03:55:00	8	3	SF	LO
2013-07-28	04:03:00	7	3	S	LO
2013-07-31	01:07:00	11	3	D	LO	R
2013-07-31	20:50:00	8	3	A	CM	R
2013-07-31	22:55:00	9	3	A	LO
2013-07-31	23:40:00	14	3	A	LO	R
2013-08-01	00:46:00	14	3	S	LO
2013-08-01	22:30:00	21	3	A	LO
2013-08-02	23:02:00	4	2	S	LO
2013-08-04	23:20:00	6	3	NA	LO
2013-08-04	23:42:00	10	2	A	LO	R
2013-08-05	00:20:00	5	2	NA	LO
2013-08-05	04:15:00	9	2	S	LO
2013-08-05	23:11:00	14	3	A	LO	R
2013-08-07	23:50:00	18	2	A	LO	R
2013-08-14	04:03:00	18	3	S	LO
2013-08-14	21:13:00	20	2	A	LO	R
2013-08-17	21:05:00	7	3	A	LO	R
2013-08-17	22:00:00	13	3	S	LO	R
2013-08-20	00:00:00	7	3	A	LO	R
2013-08-20	02:00:00	1	2	A	LO	R
2013-08-20	02:38:00	7	2	SF	LO
2013-08-20	23:12:00	10	2	A	LO	R
2013-08-21	03:30:00	2	3	A	LO	R
2013-08-21	04:24:00	10	3	A	LO
2013-08-21	10:00:00	17	3	D	-
2013-08-22	00:24:00	10	3	A	LO
2013-08-23	01:58:00	10	3	A	LO
2013-08-24	01:30:00	7	3	S	LO
2013-08-25	03:15:00	18	2	S	LO
2013-08-26	03:24:00	8	2	S	LO
2013-08-27	21:40:00	5	3	-	LO
2013-08-28	21:45:00	20	3	A	LO	A1
2013-08-28	22:20:00	7	2	S	LO
2013-08-28	22:40:00	1	3	S	LO
2013-08-29	22:20:00	11	3	A	LO	A3
2013-08-30	03:25:00	4	2	SF	LO
2013-08-30	23:21:00	20	3	A	LO	A5
2013-09-02	03:22:00	13	3	A	LO	A7
2013-09-04	00:23:00	11	2	S	LO
2013-09-04	00:40:00	6	3	S	LO
2013-09-04	04:55:00	8	3	S	LO
2013-09-04	05:46:00	4	3	S	LO
2013-09-05	00:37:00	23	2	A	LO	B2
2013-09-08	03:38:00	18	3	A	LO	B4
2013-09-08	05:29:00	17	3	S	LO
2013-09-08	05:40:00	11	2	S	LO
2013-09-09	02:19:00	18	3	A	LO	B6
2013-09-10	03:18:00	12	3	S	LO
2013-09-11	03:22:00	11	3	S	LO
2013-09-11	03:26:00	11	3	A	LO	C1
2013-09-11	03:26:00	2	3	SF	LO
2013-09-11	03:28:00	1	2	A	LO	C3
2013-09-11	05:20:00	21	2	A	LO	C5
2013-09-11	05:30:00	21	2	A	LO	C7
2013-09-13	06:08:00	1	3	A	LO	D2
2013-09-13	06:26:00	1	3	A	LO	D4
2013-09-13	21:55:00	16	3	SF	LO
2013-09-14	01:16:00	8	3	S	LO
2013-09-14	05:15:00	21	3	S	LO
2013-09-14	05:18:00	20	2	S	LO
2013-09-14	05:23:00	17	3	S	LO
2013-09-14	22:00:00	18	2	S	LO
2013-09-14	22:14:00	11	2	S	LO
2013-09-14	22:17:00	12	2	S	LO
2013-09-15	20:33:00	6	3	A	LO	D6
2013-09-16	02:13:00	15	3	NA	LO
2013-09-16	02:42:00	9	2	A	LO	E1
2013-09-16	22:47:00	10	2	S	LO
2013-09-17	01:04:00	21	2	SF	LO
2013-09-17	05:40:00	10	3	NA	LO
2013-09-17	05:50:00	10	2	S	LO
2013-09-17	06:10:00	4	2	A	LO	E3
2013-09-17	06:10:00	4	3	S	LO
2013-09-17	22:32:00	3	2	A	LO	E5
2013-09-17	23:34:00	10	2	A	LO	E7
2013-09-17	23:57:00	17	3	A	LO	F2
2013-09-18	04:21:00	16	2	A	LO	F4
2013-09-18	05:41:00	6	3	D	LO
2013-09-18	05:49:00	4	3	SF	LO
2013-09-18	23:19:00	18	3	A	LO	F6
2013-09-18	23:41:00	18	3	A	LO	G1
2013-09-19	01:05:00	18	3	A	LO	G5
2013-09-20	00:22:00	13	3	D	-
2013-09-21	00:47:00	10	1	A	-
2013-09-21	01:37:00	9	2	D	-
2013-09-21	05:52:00	1	2	A	LO	H2
2013-09-22	02:33:00	18	3	S	LO
2013-09-22	02:42:00	21	3	SF	LO
2013-09-22	02:48:00	23	3	S	LO
2013-09-22	02:48:00	23	3	NA	LO
2013-09-23	20:17:00	19	3	S	LO
2013-09-23	20:17:00	19	3	NA	LO
2013-09-24	02:41:00	18	2	A	LO	H4
2013-09-24	02:56:00	17	2	NA	LO
2013-09-24	03:00:00	15	2	S	LO
2013-09-24	03:04:00	14	3	S	LO
2013-09-24	03:26:00	3	2	S	LO
2013-09-24	04:27:00	18	3	S	LO
2013-09-24	04:39:00	23	3	S	LO
2013-09-24	04:41:00	24	3	S	LO
2013-09-24	04:57:00	28	3	-	LO
2013-09-24	19:03:00	16	2	A	LO	I1
2013-09-24	20:00:00	5	2	A	LO	H6
2013-09-24	20:39:00	23	1	S	LO
2013-09-24	20:49:00	9	1	SF	LO
2013-09-25	03:02:00	20	3	NA	LO
2013-09-25	03:29:00	10	3	S	LO
2013-09-25	04:42:00	23	2	SF	LO
2013-09-25	19:30:00	4	3	S	LO
2013-09-25	20:15:00	9	3	S	LO
2013-09-25	20:27:00	12	3	NA	LO
2013-09-26	05:24:00	11	2	S	LO
2013-09-26	05:38:00	5	2	S	LO
2013-09-26	05:44:00	4	2	A	LO	I3
2013-09-26	18:49:00	11	3	S	LO
2013-09-27	05:23:00	17	3	A	LO	I5
2013-09-28	05:18:00	11	2	A	LO	I7
2013-09-28	05:40:00	5	2	S	LO
2013-09-28	22:37:00	13	3	D	-
2013-09-28	22:37:00	13	2	A	LO	J4
2013-09-28	22:40:00	9	3	D	-
2013-09-28	23:52:00	11	2	A	LO	J2
2013-09-29	04:00:00	14	3	A	LO	K1
2013-09-29	04:15:00	26	3	A	LO	J6
2013-09-29	05:07:00	12	2	S	LO
2013-09-29	05:14:00	10	2	S	LO
2013-09-29	22:32:00	6	2	A	LO	K3
2013-09-30	05:15:00	14	3	S	LO
2013-09-30	05:34:00	3	2	SF	LO
2013-09-30	05:40:00	2	2	S	LO
2013-09-30	23:28:00	14	3	NA	LO
2013-10-01	00:46:00	17	2	A	LO	K5
2013-10-01	02:47:00	11	3	A	LO	K7
2013-10-01	06:00:00	10	2	NA	LO
2013-10-02	00:07:00	19	3	S	LO
2013-10-02	00:22:00	13	3	D	-
2013-10-02	00:22:00	13	2	S	LO
2013-10-03	00:06:00	20	2	A	LO	L2
2013-10-03	00:45:00	11	3	A	LO	A6
2013-10-03	01:00:00	11	2	SF	LO
2013-10-03	01:01:00	12	3	S	LO
2013-10-03	01:10:00	9	3	A	LO	L4
2013-10-03	01:25:00	10	3	NA	LO
2013-10-03	01:50:00	6	3	A	LO	L6
2013-10-03	05:07:00	20	3	S	LO
2013-10-03	05:33:00	5	2	A	LO	A2
2013-10-03	23:08:00	20	2	A	LO	A4
2013-10-03	23:30:00	18	3	S	LO
2013-10-03	23:52:00	8	2	A	LO	B1
2013-10-04	23:05:00	18	2	S	LO
2013-10-04	23:30:00	11	3	S	LO
2013-10-04	23:50:00	1	2	S	LO
2013-10-05	00:30:00	8	1	A	LO	B5
2013-10-05	01:08:00	11	3	A	LO	B3
2013-10-05	01:34:00	14	2	S	LO
2013-10-05	05:30:00	16	2	S	LO
2013-10-05	05:37:00	7	3	S	LO
2013-10-06	00:05:00	18	2	S	LO
2013-10-06	00:30:00	3	2	S	LO
2013-10-06	00:32:00	2	3	S	LO
2013-10-06	02:04:00	14	2	A	LO	B7
2013-10-06	05:20:00	9	2	S	-
2013-10-08	01:11:00	17	2	S	LO
2013-10-08	01:13:00	12	2	A	LO	C2
2013-10-08	19:00:00	6	3	A	LO	C4
2013-10-09	03:14:00	10	2	A	LO	C6
2013-10-10	05:25:00	16	3	NA	LO
2013-10-10	05:30:00	18	3	S	LO
2013-10-10	05:41:00	-	3	S	LO
2013-10-10	20:19:00	36	-	A	LO	D1
2013-10-10	20:19:00	12	3	A	LO	D3
2013-10-10	20:55:00	18	3	A	LO	D5
2013-10-11	05:23:00	11	3	S	LO
2013-10-11	20:16:00	14	3	S	LO
2013-10-11	20:20:00	13	3	A	LO	D7
2013-10-11	22:54:00	14	3	SF	LO
2013-10-12	05:07:00	21	2	S	LO
2013-10-12	05:15:00	17	2	S	LO
2013-10-12	20:00:00	3	2	S	LO
2013-10-12	20:35:00	4	3	A	LO	E6
2013-10-12	20:53:00	1	2	A	LO	E2
2013-10-12	21:10:00	8	3	A	LO	E4
2013-10-12	21:37:00	14	2	S	LO
2013-10-13	04:20:00	8	2	S	LO
2013-10-13	04:25:00	7	2	S	LO
2013-10-13	04:34:00	5	3	S	LO
2013-10-13	04:40:00	5	2	SF	LO
2013-10-13	04:41:00	5	3	S	LO
2013-10-13	21:10:00	23	2	A	LO
2013-10-13	22:20:00	5	2	S	LO
2013-10-14	05:26:00	10	2	S	LO
2013-10-14	23:19:00	11	3	S	LO
2013-10-14	1900-01-01 05:20:00	16	2	A	LO	F1
2013-10-15	05:30:00	3	2	A	LO	F3
2013-10-15	21:10:00	15	2	A	LO	F7
2013-10-15	21:32:00	11	2	A	LO	F5
2013-10-15	22:34:00	7	3	NA	LO
2013-10-16	05:37:00	6	2	S	LO
2013-10-17	02:34:00	3	2	A	LO	G2
2013-10-20	02:14:00	15	2	S	LO
2013-10-22	01:58:00	7	3	A	LO	R
2013-10-22	20:12:00	7	2	S	LO
2013-10-23	03:07:00	19	2	S	LO
2013-10-23	03:16:00	15	2	S	LO
2013-10-23	03:25:00	10	2	S	LO
2013-10-23	03:31:00	8	2	S	LO
2013-10-23	04:39:00	22	2	S	LO
2013-10-23	20:50:00	5	2	A	LO	R
2013-10-25	03:15:00	15	2	S	LO
2013-10-25	03:21:00	11	2	S	LO
2013-10-25	03:29:00	10	3	SF	LO
2013-10-25	03:35:00	8	2	A	LO	R
2013-10-25	03:50:00	7	2	S	LO
2013-10-25	05:08:00	19	2	A	LO
2013-10-26	02:50:00	13	3	S	LO
2013-10-26	19:26:00	5	2	A	LO	R
2013-10-28	02:51:00	20	2	A	LO	R
2013-10-28	03:17:00	14	3	A	LO	R
2013-10-28	04:00:00	10	2	S	LO
2013-10-28	04:29:00	1	3	S	LO
2013-10-28	05:17:00	23	3	S	LO
2013-10-28	22:18:00	11	2	NA	LO
2013-10-28	22:44:00	10	2	S	LO
2013-10-28	23:43:00	11	2	SF	LO
2013-10-28	23:54:00	14	2	A	LO	R
2013-10-29	00:35:00	20	2	A	LO
2013-10-30	05:15:00	16	2	S	LO
2013-10-30	05:20:00	14	3	S	LO
2013-10-30	05:25:00	8	2	S	LO
2013-10-30	21:35:00	11	2	A	LO	R
2013-10-30	23:00:00	3	1	A	LO	R
2013-10-31	02:02:00	7	2	A	LO
2013-11-02	05:17:00	14	2	D	LO
2013-11-02	05:40:00	5	2	A	LO	R
2013-11-02	06:30:00	22	2	S	LO
2013-11-02	15:49:00	29	3	A	LO	R
2013-11-02	23:22:00	10	3	S	LO
2013-11-03	00:32:00	11	2	S	LO
2013-11-04	00:20:00	15	3	A	LO
2013-11-04	01:05:00	2	2	A	LO	R
2013-11-04	04:41:00	17	3	A	LO	R
2013-11-05	00:30:00	13	2	A	LO	R
2013-11-06	19:23:00	6	2	SF	LO
2013-11-06	20:15:00	11	3	A	LO	R
2013-11-07	02:07:00	20	2	A	LO	R
2013-11-07	19:45:00	14	2	SF	LO
2013-11-09	04:55:00	22	2	A	LO	R
2013-11-10	04:15:00	8	2	S	LO
2013-11-10	04:15:00	9	2	S	LO
2013-11-10	10:15:00	24	2	A	LO	R
2013-11-11	03:35:00	4	2	A	LO	R
2013-11-11	20:27:00	12	2	A	LO	R
2013-11-11	22:39:00	18	2	A	LO	R
2013-11-11	23:15:00	14	3	A	LO	R
2013-11-11	23:25:00	13	2	A	LO	R
2013-11-12	21:47:00	12	2	A	LO	R
2013-11-12	23:32:00	23	2	A	LO	R
2013-11-14	02:40:00	9	2	S	LO
2013-11-15	01:19:00	17	3	S	LO
2013-11-15	01:59:00	1	2	A	LO	R
2013-11-16	01:55:00	3	2	S	LO
2013-11-16	10:27:00	4	2	S	LO
2013-11-18	05:36:00	11	2	S	LO
2013-11-20	02:25:00	19	2	S	LO
2013-11-23	05:42:00	1	2	S	LO
2013-11-30	05:15:00	19	2	S	LO

## Sheet: CDO 2014
Date	Time	Sector	Zone	NestingEvent	Species	HatcheryLocation
2014-07-12	23:49:00	11	3	S	LO
2014-07-13	01:28:00	22	2	S	LO
2014-07-15	01:34:00	9	2	S	LO
2014-07-16	01:20:00	17	2	S	LO
2014-07-16	01:20:00	17	3	S	LO
2014-07-16	01:40:00	12	2	S	LO
2014-07-16	01:40:00	12	2	SF	LO
2014-07-16	02:15:00	1	2	S	LO
2014-07-18	21:00:00	9	2	S	LO
2014-07-18	22:24:00	10	2	S	LO
2014-07-18	22:34:00	11	2	S	LO
2014-07-18	22:51:00	15	3	SF	LO
2014-07-21	07:41:00	18	2	S	LO
2014-07-21	07:49:00	11	2	S	LO
2014-07-22	04:37:00	15	2		LO
2014-07-22	04:46:00	11	2	S	LO
2014-07-23	00:22:00	14	3	A	LO	R
2014-07-24	00:10:00	14	2	S	LO
2014-07-24	02:13:00	10	2	A	LO	R
2014-07-25	01:05:00	13	2	S	LO
2014-07-25	02:30:00	16	2	S	LO
2014-07-26	01:11:00	6	2	S	LO
2014-07-26	05:53:00	42	3	A	LO	A1
2014-07-26	06:02:00	43	2	S	LO
2014-07-26	06:30:00	11	2	S	LO
2014-07-27	01:12:00	14	2	S	LO
2014-07-27	01:23:00	7	2	SF	LO
2014-07-27	05:57:00	29	2	A	LO	A5
2014-07-27	06:31:00	33	2	A	LO	A3
2014-07-28	02:28:00	11	2	A	LO	A9
2014-07-29	01:57:00	11	2	A	LO	A7
2014-07-29	02:43:00	13	2		LO
2014-07-30	03:23:00	21	2	A	LO	B2
2014-07-30	03:30:00	22	2	NA	LO
2014-07-31	02:47:00	1	2	A	LO	B4
2014-07-31	04:31:00	21	2	A	LO	B6
2014-07-31	20:00:00	1	2	S	LO
2014-08-02	04:04:00	3	2	A	LO	B8
2014-08-02	04:41:00	14	2	S	LO
2014-08-02	05:20:00	25	2	S	LO
2014-08-03	21:48:00	13	2	A	LO	B10
2014-08-03	23:29:00	5	2	A	LO	C1
2014-08-04	05:30:00	5	2	A	LO	C3
2014-08-04	21:25:00	20	2	A	LO	C5
2014-08-04	21:59:00	21	2	A	LO	C7
2014-08-05	20:31:00	23	1	A	LO	C9
2014-08-05	21:47:00	1	2	A	LO	D1
2014-08-06	05:15:00	18	2	A	LO	D3
2014-08-06	05:40:00	19	2	A	LO	D5
2014-08-06	06:58:00	28	2	S	LO
2014-08-06	07:08:00	29	2	S	LO
2014-08-06	07:17:00	38	2	SF	LO
2014-08-06	07:59:00	3	2	S	LO
2014-08-06	23:24:00	12	2	S	LO
2014-08-07	05:23:00	15	3	S	LO
2014-08-07	23:30:00	9	3	S	LO
2014-08-07	23:39:00	9	3	A	LO	D7
2014-08-08	05:31:00	9	3	S	LO
2014-08-08	05:40:00	3	3	S	LO
2014-08-08	22:42:00	22	2	S	LO
2014-08-09	00:12:00	10	3	S	LO
2014-08-09	22:02:00	11	2	A	LO	D9
2014-08-09	23:07:00	15	2	NA	LO
2014-08-10	05:17:00	23	2	A	LO	E2
2014-08-13	00:45:00	21	2	S	LO
2014-08-13	01:22:00	7	2	A	LO	E4
2014-08-13	02:08:00	10	3	NA	LO
2014-08-14	00:34:00	9	3	A	LO	E6
2014-08-14	01:23:00	17	2	A	LO	E8
2014-08-14	02:32:00	22	3	A	LO	E10
2014-08-14	02:45:00	14	3	A	LO	F1
2014-08-14	03:25:00	19	2	A	LO	F4
2014-08-14	20:57:00	13	3	A	LO	F5
2014-08-15	19:56:00	8	3	A	LO	F7
2014-08-16	02:10:00	19	3	S	LO
2014-08-16	02:30:00	12	2	S	LO
2014-08-16	02:45:00	3	3	S	LO
2014-08-16	03:50:00	21	2	S	LO
2014-08-16	22:18:00	20	2	A	LO	F9
2014-08-18	04:39:00	18	2	S	LO
2014-08-18	04:45:00	17	2	S	LO
2014-08-18	04:49:00	15	2	S	LO
2014-08-18	04:55:00	9	2	S	LO
2014-08-18	05:30:00	23	2	S	LO
2014-08-18	20:24:00	24	2	A	LO	A2
2014-08-18	21:08:00	4	2	S	LO
2014-08-18	22:25:00	25	2	S	LO
2014-08-19	04:50:00	11	3	A	LO	A4
2014-08-19	21:21:00	13	3	A	LO	A6
2014-08-20	05:13:00	9	2	S	LO
2014-08-20	05:29:00	32	1	SF	LO
2014-08-20	05:30:00	36	1	SF	LO
2014-08-20	05:32:00	38	1	SF	LO
2014-08-20	23:05:00	20	3	A	LO	A8
2014-08-21	05:36:00	18	3	A	LO	A10
2014-08-22	00:31:00	11	2	A	LO	A2
2014-08-22	00:40:00	11	3	A	LO	A4
2014-08-22	00:40:00	10	2	A	LO	B1
2014-08-22	01:30:00	9	2	A	LO	B3
2014-08-22	02:20:00	5	1	SF	LO
2014-08-22	02:26:00	9	2	S	LO
2014-08-22	05:27:00	36	3	SF	LO
2014-08-22	05:46:00	12	3	S	LO
2014-08-23	00:43:00	5	2	S	LO
2014-08-23	05:16:00	18	2	S	LO
2014-08-23	05:28:00	10	3	SF	LO
2014-08-23	05:34:00	5	2	S	LO
2014-08-24	02:42:00	9	2	A	LO	B5
2014-08-24	02:53:00	9	2	A	LO	B7
2014-08-25	02:21:00	14	3	A	LO	B9
2014-08-25	04:03:00	22	2	A	LO	C2
2014-08-25	05:16:00	32	2	A	LO	C4
2014-08-25	05:30:00	32	3	A	LO	C6
2014-08-26	02:38:00	19	3	A	LO	C8
2014-08-26	03:15:00	1	1	SF	LO
2014-08-26	04:10:00	4	3	S	LO
2014-08-26	06:03:00	44	3	S	LO
2014-08-28	02:18:00	17	1	A	LO	C10
2014-08-28	19:52:00	10	2	A	LO	D2
2014-08-28	20:30:00	11	3	A	LO	D4
2014-08-28	20:45:00	14	2	A	LO	D6
2014-08-29	02:25:00	12	3	A	LO	D8
2014-08-29	03:20:00	9	3	SF	LO
2014-08-29	04:00:00	22	3	A	LO	R
2014-08-29	19:16:00	9	2	A	LO	D10
2014-08-30	02:29:00	12	3	NA	LO
2014-08-30	21:40:00	10	2	A	LO	E1
2014-08-31	05:47:00	1	2	A	LO	E3
2014-09-01	06:10:00	28	2	D	LO
2014-09-01	20:15:00	23	2	A	LO	E5
2014-09-02	05:03:00	16	2	A	LO	E7
2014-09-02	05:40:00	16	1	SF	LO
2014-09-02	20:34:00	10	2	A	LO	E9
2014-09-02	21:40:00	12	3	S	LO
2014-09-03	19:54:00	11	2	A	LO	F2
2014-09-03	21:15:00	14	2	A	LO	F3
2014-09-04	05:14:00	21	3	S	LO
2014-09-04	05:19:00	22	2	S	LO
2014-09-04	05:23:00	27	1	SF	LO
2014-09-04	05:25:00	29	1	SF	LO
2014-09-04	05:27:00	31	2	S	LO
2014-09-04	05:35:00	38	2	S	LO
2014-09-04	05:55:00	19	2	S	LO
2014-09-04	05:56:00	18	2	S	LO
2014-09-04	06:01:00	9	2	S	LO
2014-09-04	06:06:00	8	2	S	LO
2014-09-04	06:12:00	1	2	S	LO
2014-09-04	20:20:00	19	3	A	LO	F6
2014-09-05	00:47:00	21	2	S	LO
2014-09-05	01:15:00	23	3	S	LO
2014-09-05	04:38:00	20	2	S	LO
2014-09-05	04:55:00	13	2	A	LO	F8
2014-09-05	05:21:00	24	1	S	LO
2014-09-05	05:25:00	28	3	S	LO
2014-09-05	05:35:00	36	3	S	LO
2014-09-05	05:37:00	37	2	S	LO
2014-09-05	22:53:00	12	2	S	LO
2014-09-05	23:13:00	11	2	S	LO
2014-09-05	23:35:00	5	2	A	LO	F10
2014-09-06	00:35:00	9	2	S	LO
2014-09-06	00:44:00	20	3	A	LO	R
2014-09-06	04:22:00	46	1	A	LO	R
2014-09-06	04:54:00	23	2	A	LO	R
2014-09-06	23:22:00	18	2	S	LO
2014-09-06	23:47:00	5	2	S	LO
2014-09-07	01:20:00	13	2	S	LO
2014-09-07	01:34:00	9	2	S	LO
2014-09-07	01:45:00	12	3	A	LO	R
2014-09-07	02:06:00	21	2	AS	LO	R
2014-09-07	18:59:00	22	3	A	LO	F11
2014-09-08	02:16:00	24	3	A	LO	R
2014-09-08	02:20:00	18	3	SF	LO
2014-09-08	05:33:00	39	2	A	LO	IS
2014-09-08	05:58:00	11	3	S	LO
2014-09-08	23:30:00	17	3	S	LO
2014-09-09	04:45:00	19	2	SF	LO
2014-09-10	21:00:00	7	2	A	LO	E11
2014-09-10	21:17:00	3	3	A	LO	D11
2014-09-12	02:55:00	22	3	A	LO	Z10
2014-09-13	01:42:00	16	2	S	LO
2014-09-13	01:50:00	14	2	S	LO
2014-09-13	02:02:00	9	2	S	LO
2014-09-13	02:10:00	7	2	S	LO
2014-09-14	04:20:00	8	2	S	LO
2014-09-14	04:20:00	8	2	S	LO
2014-09-14	04:45:00	19	3	SF	LO
2014-09-14	04:45:00	19	3	SF	LO
2014-09-14	05:29:00	11	2	S	LO
2014-09-14	05:29:00	11	2	S	LO
2014-09-14	21:18:00	17	2	A	LO	Z9
2014-09-15	05:07:00	20	2	S	LO
2014-09-15	05:07:00	20	2	S	LO
2014-09-15	05:12:00	16	3	S	LO
2014-09-15	05:27:00	29	2	S	LO
2014-09-15	05:27:00	29	2	S	LO
2014-09-15	20:17:00	10	2	A	LO	Z8
2014-09-15	20:33:00	9	2	NA	LO
2014-09-15	20:45:00	3	3	S	LO
2014-09-15	20:49:00	2	3	NA	LO
2014-09-16	04:23:00	20	2	S	LO
2014-09-16	04:24:00	20	2	S	LO
2014-09-16	04:40:00	18	2	S	LO
2014-09-16	04:46:00	16	2	SF	LO
2014-09-16	04:58:00	8	3	S	LO
2014-09-16	05:02:00	5	3	S	LO
2014-09-16	05:30:00	22	2	SF	LO
2014-09-18	03:22:00	17	2	A	LO	Z6
2014-09-18	03:37:00	13	2	A	LO	Z4
2014-09-18	04:00:00	10	2	S	LO
2014-09-18	04:12:00	3	3	A	LO	Z2
2014-09-18	04:30:00	3	2	A	LO	R
2014-09-18	04:35:00	1	2	A	LO	A1
2014-09-18	05:11:00	19	2	SF	LO
2014-09-19	06:07:00	20	2	S	LO
2014-09-19	06:11:00	18	2	S	LO
2014-09-19	06:16:00	14	2	S	LO
2014-09-19	06:27:00	6	2	S	LO
2014-09-20	00:05:00	19	2	S	LO
2014-09-20	00:12:00	18	2	A	LO	A3
2014-09-21	05:25:00	12	2	S	LO
2014-09-21	05:28:00	11	2	S	LO
2014-09-21	05:38:00	8	2	S	LO
2014-09-21	05:39:00	8	2	S	LO
2014-09-21	06:51:00	27	2	S	LO
2014-09-21	07:03:00	33	3	S	LO
2014-09-21	07:16:00	42	2	S	LO
2014-09-21	23:23:00	12	2	A	LO	A5
2014-09-22	06:42:00	13	2	S	LO
2014-09-22	06:46:00	12	3	S	LO
2014-09-22	06:50:00	10	2	S	LO
2014-09-22	06:52:00	8	2	S	LO
2014-09-22	06:59:00	4	1	S	LO
2014-09-23	05:27:00	17	2	S	LO
2014-09-23	05:32:00	14	2	S	LO
2014-09-23	05:43:00	7	1	S	LO
2014-09-23	06:06:00	7	2	S	LO
2014-09-23	06:52:00	24	2	S	LO
2014-09-25	01:15:00	19	1	S	LO
2014-09-25	01:19:00	18	2	A	LO	A7
2014-09-26	00:36:00	6	2	SF	LO
2014-09-26	00:46:00	1	2	S	LO
2014-09-26	01:37:00	15	2	A	LO	A9
2014-09-27	00:38:00	20	2	A	LO	B2
2014-09-27	01:31:00	8	2	S	LO
2014-09-27	01:42:00	2	2	S	LO
2014-09-27	02:09:00	2	2	A	LO	B4
2014-09-28	01:11:00	20	2	S	LO
2014-09-28	01:26:00	19	2	A	LO	B6
2014-09-28	02:20:00	13	2	A	LO	B8
2014-09-28	03:06:00	10	2	A	LO	B10
2014-09-29	02:11:00	7	2	SF	LO
2014-09-29	02:18:00	4	2	S	LO
2014-09-29	02:34:00	0	2	A	LO	C1
2014-09-29	03:17:00	9	2	NA	LO
2014-09-29	04:20:00	27	2	A	LO	C3
2014-09-29	04:25:00	24	2	SF	LO
2014-09-29	20:04:00	0	2	A	LO	C5
2014-09-29	20:40:00	3	2	A	LO	C7
2014-10-01	19:48:00	6	2	A	LO	C9
2014-10-03	23:31:00	18	2	A	LO	D3
2014-10-05	01:52:00	11	2	A	LO	D5
2014-10-05	02:13:00	11	3	A	LO	D7
2014-10-05	05:15:00	28	2	S	LO
2014-10-05	05:15:00	17	2	S	LO
2014-10-05	21:35:00	14	2	A	LO	D9
2014-10-06	05:15:00	20	2	A	LO	E2
2014-10-06	05:37:00	13	2		LO
2014-10-06	05:48:00	4	2	S	LO
2014-10-06	05:59:00	39	2	D	LO
2014-10-06	07:24:00	1	2	A	LO	E4
2014-10-07	02:46:00	3	2	A	LO	E6
2014-10-07	02:56:00	1	1	A	LO	E8
2014-10-07	05:11:00	23	2	A	LO	E10
2014-10-07	05:27:00	23	2	A	LO	F1
2014-10-07	22:25:00	6	2	A	LO	F5
2014-10-09	23:35:00	11	2	A	LO	F4
2014-10-10	06:29:00	8	2	A	LO	F7
2014-10-10	07:11:00	13	2	S	LO
2014-10-10	23:35:00	19	2	A	LO	F9
2014-10-11	00:29:00	15	2	A	LO	A2
2014-10-11	01:45:00	16	2	A	LO	A4
2014-10-12	00:42:00	15	2	SF	LO
2014-10-12	01:40:00	23	2	A	LO	A6
2014-10-12	02:45:00	20	2	A	LO	A8
2014-10-13	02:10:00	16	2	SF	LO
2014-10-13	02:30:00	7	2	A	LO	A10
2014-10-13	03:08:00	11	2	A	LO	B1
2014-10-13	04:13:00	28	2	A	LO	B3
2014-10-13	18:22:00	21	2	A	LO	R
2014-10-13	19:24:00	20	2	A	LO	B5
2014-10-13	20:00:00	20	2	S	LO
2014-10-14	02:35:00	5	2	A	LO	B7
2014-10-14	03:17:00	9	1	A	LO	B9
2014-10-14	19:40:00	4	1	SF	LO
2014-10-14	19:50:00	2	2	A	LO	C2
2014-10-15	00:00:00	21	2	A	LO	C4
2014-10-15	02:40:00	18	2	A	LO	C6
2014-10-15	03:00:00	15	2	A	LO	IS
2014-10-15	03:27:00	10	1	A	LO	C8
2014-10-15	03:40:00	7	2	A	LO	Z1
2014-10-15	03:50:00	6	2	A	LO	IS
2014-10-15	05:17:00	39	2	S	LO
2014-10-15	20:23:00	3	2	A	LO	C10
2014-10-15	23:15:00	11	2	S	LO
2014-10-15	23:50:00	15	2	A	LO	Z7
2014-10-16	00:44:00	3	2	A	LO	Z5
2014-10-16	05:13:00	24	2	S	LO
2014-10-16	05:26:00	33	2	DS	LO
2014-10-16	05:35:00	36	2	A	LO	Z3
2014-10-16	05:46:00	4	2	S	LO
2014-10-16	05:52:00	42	2		LO
2014-10-17	23:24:00	13	2	NA	LO
2014-10-18	00:49:00	19	2	A	LO	D4
2014-10-18	00:57:00	18	2	A	LO	D2
2014-10-18	05:18:00	15	2	A	LO	D6
2014-10-18	05:21:00	25	2	S	LO
2014-10-18	05:31:00	15	2	A	LO	D8
2014-10-18	23:50:00	10	2	A	LO	D10
2014-10-19	05:02:00	19	2	S	LO
2014-10-19	05:05:00	25	2	S	LO
2014-10-19	05:08:00	10	2	S	LO
2014-10-19	05:17:00	29	2		LO
2014-10-19	05:26:00	36	2	S	LO
2014-10-19	05:37:00	39	2	A	LO	R
2014-10-19	22:17:00	11	1	S	LO
2014-10-19	22:33:00	5	1	S	LO
2014-10-19	22:37:00	4	2	A	LO	E1
2014-10-19	22:38:00	4	2	A	LO	E3
2014-10-19	23:55:00	10	2	A	LO	R
2014-10-20	00:30:00	11	2	A	LO	R
2014-10-20	01:00:00	21	2	D	LO	IS
2014-10-20	05:21:00	18	2	S	LO
2014-10-20	05:27:00	12	2	S	LO
2014-10-20	05:41:00	4	2	S	LO
2014-10-20	05:50:00	2	2	A	LO	R
2014-10-21	23:26:00	11	2	A	LO	R
2014-10-22	00:16:00	5	2	SF	LO
2014-10-22	05:09:00	23	2	SF	LO
2014-10-23	05:11:00	24	2	A	LO	R
2014-10-23	23:17:00	11	2	A	LO	R
2014-10-24	01:31:00	17	2	A	LO	R
2014-10-25	01:17:00	14	2	A	LO	R
2014-10-25	05:11:00	12	2	S	LO
2014-10-25	05:23:00	5	2	SF	LO
2014-10-27	00:52:00	18	1	SF	LO
2014-10-27	01:01:00	22	2	S	LO
2014-10-27	01:30:00	18	2	A	LO	R
2014-10-28	01:25:00	11	2	A	LO	R
2014-10-28	02:02:00	1	2	A	LO	R
2014-10-28	03:35:00	24	2	S	LO
2014-10-29	02:18:00	16	2	A	LO	R
2014-10-29	02:47:00	4	2	A	LO	R
2014-10-31	02:32:00	12	2	A	LO	R
2014-10-31	03:23:00	4	2	S	LO
2014-10-31	04:19:00	23	2	S	LO
2014-10-31	05:02:00	21	2	SF	LO
2014-10-31	06:06:00	18	3	S	LO
2014-11-01	04:57:00	19	2		LO
2014-11-01	05:24:00	7	2	D	LO	R
2014-11-01	19:27:00	14	2	A	LO	R
2014-11-01	20:48:00	20	2	D	LO	R
2014-11-02	21:10:00	2	3	A	LO	R
2014-11-02	22:18:00	15	1	S	LO
2014-11-03	21:25:00	6	2	A	LO	R
2014-11-03	22:19:00	9	1	SF	LO
2014-11-03	22:54:00	24	2	A	LO	R
2014-11-04	21:25:00	7	2	S	LO
2014-11-05	02:24:00	2	2	S	LO
2014-11-05	03:12:00	11	2	A	LO	R
2014-11-05	03:45:00	20	2	A	LO	R
2014-11-05	22:40:00	10	2	A	LO	R
2014-11-05	23:14:00	3	2	A	LO	R
2014-11-05	23:48:00	11	2	A	LO	R
2014-11-06	02:59:00	8	2	A	LO	R
2014-11-06	04:27:00	27	2	A	LO	R
2014-11-06	23:53:00	18	2	A	LO	R
2014-11-07	23:11:00	20	2	S	LO
2014-11-10	01:32:00	12	2	A	LO	R
2014-11-10	01:42:00	8	2	S	LO
2014-11-10	01:47:00	6	2	A	LO	R
2014-11-10	02:10:00	2	1	S	LO	R
2014-11-10	20:13:00	21	3	S	LO	R
2014-11-11	05:20:00	7	2	S	LO	R
2014-11-11	05:30:00	7	2	S	LO
2014-11-11	05:35:00	5	2	S	LO
2014-11-11	20:22:00	7	1	S	LO
2014-11-13	05:32:00	5	2	S	LO
2014-11-13	20:29:00	7	2	A	LO	IS
2014-11-14	05:00:00	21	3	A	LO	R
2014-11-14	05:10:00	20	2	S	LO
2014-11-14	05:15:00	20	2	S	LO
2014-11-14	05:30:00	10	2	S	LO
2014-11-14	06:55:00	23	1	SF	LO
2014-11-14	21:42:00	4	2	S	LO
2014-11-15	23:04:00	17	2	S	LO
2014-11-16	05:24:00	15	2	S	LO
2014-11-16	05:35:00	7	3	S	LO
2014-11-16	05:37:00	6	2	S	LO
2014-11-16	05:42:00	2	2	S	LO
2014-11-16	21:46:00	7	1	A	LO	R
2014-11-17	05:44:00	1	1	A	LO	R
2014-11-17	23:15:00	18	1	A	LO	R
2014-11-18	21:32:00	4	2	S	LO
2014-11-18	23:32:00	15	2	A	LO	R
2014-11-19	01:54:00	22	2	A	LO	R
2014-11-20	01:30:00	6	2	A	LO	R
2014-11-21	02:34:00	10	2	SF	LO
2014-11-21	02:42:00	7	2	A	LO	R
2014-11-22	23:14:00	20	2	S	LO
2014-11-24	00:44:00	3	2	S	LO
2014-11-24	01:38:00	14	1	A	LO	R
2014-11-24	02:33:00	14	2	A	LO	R
2014-11-25	01:26:00	5	2	A	LO	R
2014-11-25	02:04:00	3	2	S	LO	R
2014-11-26	01:59:00	9	2	A	LO	R
2014-11-26	03:34:00	18	1	SF	LO
2014-11-27	02:36:00	5	2	A	LO	R
2014-11-29	20:44:00	20	2	A	LO	R
2014-11-30	05:23:00	3	2	S	LO
2014-11-30	22:15:00	4	2	S	LO
2014-11-30	22:38:00	24	2	A	LO	R
2014-12-01	08:25:00	21	2	S	LO
2014-12-02	05:15:00	12	2	S	LO
2014-12-03	00:37:00	9	2	A	LO	R
2014-12-03	02:10:00	26	2	A	LO	R
2014-12-03	23:18:00	26	1	S	LO
2014-12-04	01:21:00	14	2	S	LO
2014-12-04	22:28:00	14	2	S	LO
2014-12-04	23:52:00	19	2	A	LO	R
2014-12-06	00:47:00	26	3	SF	LO

## Sheet: CDO 2015
Date	Time	Sector	Zone	NestingEvent	Species	HatcheryLocation
2015-07-03	00:13:00	3	3	A	LO	R
2015-07-04	01:10:00	27	3	A	LO
2015-07-04	02:29:00	10	3	NA	LO
2015-07-06	20:03:00	3	3	A	LO	R
2015-07-10	06:12:00	23	3	SF	LO
2015-07-10	22:20:00	15	3	SF	LO
2015-07-11	06:17:00	1	2	S	LO
2015-07-12	05:10:00	19	2	A	LO	G13
2015-07-13	01:23:00	12	3	NA	LO
2015-07-14	05:55:00	9	2	A	LO	G11
2015-07-14	06:00:00	6	2	A	LO	G9
2015-07-14	06:15:00	23	3	S	LO
2015-07-17	05:00:00	4	2	SF	LO
2015-07-17	05:10:00	4	2	SF	LO
2015-07-17	05:20:00	1	2	A	LO	A1
2015-07-18	21:07:00	19	3	A	LO	A3
2015-07-19	03:30:00	3	2	A	LO	A5
2015-07-19	19:45:00	14	2	SF	LO
2015-07-19	20:55:00	13	2	A	LO	A7
2015-07-22	02:27:00	11	3	A	LO	A9
2015-07-22	02:56:00	2	2	SF	LO
2015-07-23	05:15:00	25	2	A	LO	A11
2015-07-24	05:10:00	25	2	S	LO
2015-07-24	05:30:00	17	3	A	LO	A13
2015-07-24	05:38:00	9	2	S	LO
2015-07-24	05:45:00	6	2	S	LO
2015-07-24	21:30:00	22	2	A	LO	B2
2015-07-24	22:28:00	20	3	A	LO	B4
2015-07-26	00:25:00	5	2	S	LO
2015-07-26	23:37:00	11	3	A	LO	B6
2015-07-28	00:15:00	20	2	A	LO	B8
2015-07-28	23:50:00	23	2	A	LO	B10
2015-07-29	00:53:00	15	2	SF	LO
2015-07-29	00:54:00	13	2	A	LO	B12
2015-07-29	01:20:00	12	2	A	LO	C1
2015-07-29	02:42:00	2	3	A	LO	C5
2015-07-29	21:50:00	22	2	S	LO
2015-07-29	22:18:00	17	2	A	LO	C3
2015-07-29	22:20:00	25	2	S	LO
2015-07-30	00:55:00	18	3	A	LO	C7
2015-07-30	23:15:00	15	3	A	LO	C9
2015-07-31	04:25:00	18	2	S	LO
2015-08-01	05:07:00	27	2	A	LO	C11
2015-08-02	01:43:00	17	3	A	LO	C13
2015-08-02	02:15:00	20	3	A	LO	D2
2015-08-03	00:53:00	9	2	A	LO	D4
2015-08-03	02:33:00	24	3	A	LO	D6
2015-08-04	21:17:00	15	3	A	LO	D8
2015-08-05	20:21:00	16	3	A	LO	D10
2015-08-05	21:08:00	20	3	A	LO	D12
2015-08-05	21:17:00	7	2	A	LO	E1
2015-08-05	22:10:00	4	2	NA	LO
2015-08-06	02:08:00	20	2	A	LO	E3
2015-08-06	04:20:00	13	3	A	LO	E5
2015-08-06	05:00:00	1	3	SF	LO
2015-08-06	20:48:00	16	2	A	LO	E7
2015-08-06	21:15:00	10	2	A	LO	E9
2015-08-06	21:30:00	18	2	A	LO	E13
2015-08-06	21:47:00	4	3	A	LO	E11
2015-08-07	20:47:00	19	2	A	LO	F4
2015-08-07	21:31:00	15	3	SF	LO
2015-08-07	21:35:00	15	2	A	LO	F2
2015-08-07	22:37:00	20	3	A	LO	F6
2015-08-08	23:00:00	9	2	SF	LO
2015-08-08	23:05:00	18	3	SF	LO
2015-08-08	23:20:00	2	3	SF	LO
2015-08-09	21:24:00		3	A	LO	F10
2015-08-09	23:27:00	4	3	A	LO	F12
2015-08-09	23:43:00	3	3	A	LO	G1
2015-08-10	01:23:00	17	2	A	LO	G3
2015-08-10	05:25:00	23	2	A	LO	G5
2015-08-10	21:30:00	10	2	A	LO	G7
2015-08-10	21:53:00		2	A	LO	R
2015-08-10	22:12:00	7	2	A	LO	A4
2015-08-10	22:20:00	17	2	A	LO	A2
2015-08-10	22:37:00	1	2	A	LO	A6
2015-08-10	23:25:00	5	2	A	LO	A8
2015-08-11	00:10:00	18	2	A	LO	A10
2015-08-11	02:20:00	10	2	A	LO	A12
2015-08-11	21:37:00	1	2	A	LO	B1
2015-08-11	22:15:00	16	3	A	LO	B3
2015-08-12	02:13:00	19	3	A	LO	B7
2015-08-12	03:33:00	1	3	A	LO	B5
2015-08-12	22:13:00	17	2	S	LO
2015-08-13	04:26:00	24	2	NA	LO
2015-08-13	22:39:00	3	2	S	LO
2015-08-14	00:28:00	9	3	A	LO	B9
2015-08-14	00:38:00	18	3	A	LO	B11
2015-08-14	03:39:00	2	3	A	LO	B13
2015-08-14	04:35:00	11	2	A	LO	C2
2015-08-17	02:00:00	15	2	A	LO	C6
2015-08-17	02:35:00	3	3	A	LO	C4
2015-08-18	02:10:00	18	3	SF	LO
2015-08-18	02:20:00	16	3	SF	LO
2015-08-18	20:40:00	6	3	A	LO	C8
2015-08-20	02:30:00	9	3	A	LO	C10
2015-08-21	04:31:00	3	3	SF	LO
2015-08-22	04:56:00	21	3	A	LO	C12
2015-08-22	05:10:00	14	3	S	LO
2015-08-22	06:05:00	24	2	S	LO
2015-08-22	21:15:00	18	3	A	LO	D1
2015-08-23	04:21:00	7	3	S	LO
2015-08-23	22:05:00	24	2	D	LO
2015-08-24	22:07:00	19	3	A	LO	D3
2015-08-25	05:16:00	18	2	SF	LO
2015-08-26	00:20:00	23	2	A	LO	D5
2015-08-26	00:40:00	24	2	A	LO	D7
2015-08-26	01:30:00	23	2	A	LO	D9
2015-08-26	05:56:00	22	1	SF	LO
2015-08-28	01:40:00	20	2	S	LO
2015-08-28	02:02:00	14	2	A	LO	D11
2015-08-28	02:19:00	13	2	NA	LO
2015-08-28	02:40:00	7	2	A	LO	D13
2015-08-28	03:24:00	13	3	A	LO	E2
2015-09-01	00:12:00	18	2	S	LO
2015-09-01	00:24:00	15	3	S	LO
2015-09-02	01:34:00	23	2	S	LO
2015-09-03	01:33:00		2	S	LO
2015-09-03	01:44:00		2	S	LO
2015-09-03	01:55:00	12	3	ND	LO
2015-09-03	02:02:00	10	2	S	LO
2015-09-03	02:09:00		2	S	LO
2015-09-03	20:32:00	2	3	A	LO	E4
2015-09-03	21:17:00	21	2	A	LO	E6
2015-09-03	21:50:00	28	3	A	LO	E8
2015-09-04	17:13:00	18	3	A	LO	E10
2015-09-05	04:50:00	12	3	S	LO
2015-09-05	04:55:00	11	2	S	LO
2015-09-05	05:10:00	5	2	NA	LO
2015-09-05	05:15:00	5	2	A	LO	E12
2015-09-05	21:24:00	16	3	S	LO
2015-09-05	21:34:00	15	2	S	LO
2015-09-05	21:59:00	2	3	S	LO
2015-09-05	23:12:00	14	3	A	LO	F1
2015-09-06	05:00:00	21	3	A	LO	F3
2015-09-06	05:35:00	11	2	S	LO
2015-09-06	21:19:00	18	2	A	LO	G2
2015-09-06	21:32:00	23	3	A	LO	F5
2015-09-06	21:44:00	9	1	A	LO	G4
2015-09-06	22:39:00	3	3	S	LO
2015-09-06	22:50:00	2	3	S	LO
2015-09-06	23:20:00	19	3	A	LO	G6
2015-09-08	23:50:00	9	3	A	LO	F7
2015-09-09	05:30:00	2	3	A	LO	F9
2015-09-09	05:55:00	12	3	SF	LO
2015-09-09	06:03:00	15	3	S	LO
2015-09-09	17:30:00	21	3	A	LO	F11
2015-09-09	23:10:00		3	ND	LO
2015-09-10	02:20:00	15	3	NA	LO
2015-09-10	04:00:00	24	2	NA	LO
2015-09-10	04:45:00	23	3	A	LO	F13
2015-09-11	00:28:00	18	2	A	LO	G11
2015-09-11	02:10:00	20	3	A	LO	A1
2015-09-12	05:15:00	4	3	A	LO	G8
2015-09-14	00:43:00	7	2	A	LO	G9
2015-09-14	01:00:00	6	2	A	LO	G10
2015-09-14	01:38:00	10	3	A	LO	G12
2015-09-14	02:30:00	15	3	NA	LO
2015-09-15	00:45:00	6	3	A	LO	A3
2015-09-15	01:35:00	12	2	A	LO	A5
2015-09-17	02:00:00	9	3	A	LO	A7
2015-09-17	19:40:00	7	3	A	LO	A11
2015-09-17	20:00:00	15	2	S	LO
2015-09-17	20:20:00	21	3	A	LO	A9
2015-09-17	20:50:00	24	2	A	LO	A13
2015-09-18	03:00:00	21	2	A	LO	B2
2015-09-19	02:51:00	18	2	S	LO
2015-09-19	02:51:00	18	2	S	LO
2015-09-19	03:05:00	12	2	S	LO
2015-09-19	03:05:00	12	2	S	LO
2015-09-19	19:55:00	21	3	A	LO	B4
2015-09-19	20:55:00	11		S	LO
2015-09-19	21:17:00	5	2	S	LO
2015-09-21	05:30:00	13	3	S	LO
2015-09-22	04:46:00	6	2	A	LO	B6
2015-09-22	21:38:00	5	2	A	LO	B8
2015-09-22	21:52:00	1	2	A	LO	B10
2015-09-23	22:20:00	19	2	S	LO
2015-09-24	00:30:00	2	2	A	LO	B12
2015-09-24	05:30:00	7	2	S	LO
2015-09-24	05:35:00	7	2	S	LO
2015-09-24	06:23:00	25	2	S	LO
2015-09-24	21:53:00	7	2	A	LO	C1
2015-09-24	22:22:00	3	2	A	LO	C5
2015-09-25	00:25:00	16	2	A	LO	C3
2015-09-25	22:14:00	26	3	NA	LO	C7
2015-09-26	02:08:00	2	2	A	LO	C9
2015-09-26	22:20:00	17	3	A	LO	C11
2015-09-27	23:09:00	10	3	A	LO	C13
2015-09-27	23:30:00	10	2	ND	LO
2015-09-28	22:18:00	20	3	S	LO
2015-09-30	00:27:00	9	3	S	LO
2015-09-30	00:37:00	5	3	A	LO	D6
2015-10-02	01:33:00	24	2	A	LO	D2
2015-10-02	01:53:00	19	2	A	LO	D4
2015-10-02	02:39:00	6	3	S	LO
2015-10-02	19:40:00	4	3	A	LO	D8
2015-10-02	21:16:00	17	2	A	LO	D10
2015-10-03	03:23:00	18	3	S	LO
2015-10-03	18:30:00	4	3	A	LO	D12
2015-10-03	21:40:00	20	3	A	LO	E3
2015-10-04	04:50:00	20	3	S	LO
2015-10-04	05:05:00	16	3	S	LO
2015-10-04	05:15:00	12	3	S	LO
2015-10-04	06:00:00	24	2	S	LO
2015-10-04	20:36:00	23	2	A	LO	E1
2015-10-04	20:40:00	17	3	A	LO	E5
2015-10-04	21:29:00	12	2	A	LO	E9
2015-10-04	21:40:00	20	3	A	LO	E7
2015-10-04	21:40:00	7	2	A	LO	E13
2015-10-04	21:59:00	1	3	S	LO
2015-10-04	22:10:00	5	2	S	LO
2015-10-04	22:40:00	15	3	A	LO	F4
2015-10-04	23:15:00	21	2	A	LO	F6
2015-10-05	20:38:00	20	3	A	LO	F8
2015-10-05	21:51:00	22	2	A	LO	E12
2015-10-05	21:54:00		2	NA	LO
2015-10-05	22:16:00	5	2	A	LO	F10
2015-10-05	22:43:00	2	2	A	LO	F12
2015-10-06	05:12:00	22	2	S	LO
2015-10-06	05:22:00	23	2	A	LO	G1
2015-10-06	05:32:00	24	2	A	LO	G3
2015-10-06	05:34:00	24	2	A	LO	G5
2015-10-06	21:23:00	22	2	SF	LO
2015-10-06	21:23:00	21	2	NA	LO
2015-10-06	21:52:00	6	2	NA	LO
2015-10-06	22:05:00	5	2	S	LO
2015-10-06	22:20:00	10	2	S	LO
2015-10-07	04:56:00		2	A	LO
2015-10-08	21:32:00	7	2	A	LO	G7
2015-10-08	21:48:00	1	3	A	LO	G13
2015-10-08	22:26:00	7	2	A	LO	A2
2015-10-08	22:50:00	9	2	A	LO	A4
2015-10-08	22:55:00	9	2	A	LO	A6
2015-10-10	04:45:00	22	2	D	LO	A10
2015-10-10	05:10:00	13	3	A	LO	A8
2015-10-10	22:30:00	4	3	A	LO	A12
2015-10-10	23:22:00	15	3	A	LO	B1
2015-10-10	23:45:00	22	3	A	LO	B3
2015-10-11	00:40:00	27	3	S	LO
2015-10-11	00:45:00	27	3	S	LO
2015-10-11	05:10:00	13	2	S	LO
2015-10-11	20:00:00	19	3	A	LO	B7
2015-10-12	00:01:00	20	2	A	LO	B9
2015-10-12	05:10:00	17	2	ND	LO
2015-10-12	23:20:00	16	2	A	LO	B13
2015-10-13	05:30:00	14	2	S	LO
2015-10-13	05:50:00	15	3	A	LO	B11
2015-10-13	05:55:00	15	2	S	LO
2015-10-14	01:11:00	16	2	A	LO	C2
2015-10-14	01:40:00	24	2	A	LO	C4
2015-10-14	02:40:00	7	3	A	LO	C6
2015-10-15	01:45:00	14	2	S	LO
2015-10-15	02:10:00	5	2	A	LO	C12
2015-10-15	02:45:00	19	3	A	LO	C8
2015-10-15	03:15:00	21	2	A	LO	C10
2015-10-16	01:10:00	21	3	A	LO	D1
2015-10-16	03:37:00	5	2	A	LO	D3
2015-10-17	02:15:00	6	2	A	LO	D5
2015-10-17	02:30:00	2	2	A	LO	D7
2015-10-18	16:04:00	21	2	A	LO	F2
2015-10-19	03:15:00	13	3	A	LO	R13
2015-10-19	03:30:00		2	SF	LO
2015-10-19	04:00:00	2	2	A	LO	B5
2015-10-19	20:30:00	9	2	A	LO	R22
2015-10-19	21:32:00	22	2	A	LO	D13
2015-10-20	03:30:00	12	2	ND	LO
2015-10-20	21:45:00		3	A	LO
2015-10-20	22:00:00	12	3	A	LO	E2
2015-10-21	04:45:00	3	2	A	LO	D9
2015-10-21	04:50:00	9	2	A	LO	D11
2015-10-21	04:55:00	9	2	A	LO	IS
2015-10-21	05:00:00	10	2	A	LO	IS
2015-10-21	18:30:00	10	2	S	LO
2015-10-21	20:30:00	11	2	S	LO
2015-10-22	05:30:00	3	2	S	LO
2015-10-22	23:00:00	11	2	S	LO
2015-10-22	23:45:00	11	2	A	LO	E10
2015-10-23	20:27:00	8	2	AS	LO	R
2015-10-23	20:40:00	6	3	A	LO	E12
2015-10-23	21:40:00	12	2	A	LO	E4
2015-10-23	22:00:00	17	2	A	LO	E6
2015-10-24	04:40:00	14	2	A	LO	E8
2015-10-24	04:52:00	10	2	A	LO	Z13
2015-10-24	05:14:00	9	1	SF	LO
2015-10-25	05:50:00	23	3	S	LO
2015-10-25	21:45:00	19	2	A	LO	F1
2015-10-25	22:29:00	13	2	A	LO	Y13
2015-10-25	22:50:00	10	2	A	LO	Z12
2015-10-25	23:00:00	8	3	A	LO	Y12
2015-10-26	22:30:00	8	3	S	LO
2015-10-26	23:00:00	20	3	A	LO	Z11
2015-10-27	20:00:00	21	3	A	LO	Z9
2015-10-28	00:30:00	25	3	NA	LO
2015-10-29	01:32:00	15	3	A	LO	A1
2015-10-29	02:10:00	20	2	D	LO
2015-10-30	19:28:00	19	3	NA	LO
2015-10-31	01:01:00	11	2	A	LO	IS
2015-11-01	01:10:00	20	3	A	LO	Z8
2015-11-01	19:45:00	9	3	A	LO	F3
2015-11-01	20:30:00	8	3	A	LO	F5
2015-11-01	20:55:00	3	3	A	LO	IS
2015-11-02	05:30:00	12	2	A	LO	Z7
2015-11-02	20:35:00	19	3	A	LO	F7
2015-11-02	21:30:00	27	3	S	LO
2015-11-03	04:37:00	17	3	A	LO	F9
2015-11-03	04:54:00	7	2	A	LO	F11
2015-11-03	20:30:00	19	2	A	LO	G4
2015-11-03	21:05:00	20	3	A	LO	G2
2015-11-03	23:03:00	28	2	A	LO	G6
2015-11-03	23:30:00	15	2	A	LO	G11
2015-11-04	05:30:00	19	3	A	LO	G8
2015-11-04	06:00:00	11	2	S	LO
2015-11-04	19:00:00	8	2	A	LO	G10
2015-11-04	20:30:00	13	2	A	LO	G12
2015-11-04	22:40:00	18	2	A	LO	Z5
2015-11-05	05:15:00	21	2	A	LO	Z3
2015-11-05	05:30:00	19	2	A	LO	Z10
2015-11-05	06:15:00	12	2	A	LO	IS
2015-11-05	06:25:00	11	2	S	LO
2015-11-05	06:40:00	3	2	A	LO	IS
2015-11-05	20:46:00	18	2	A	LO	A7
2015-11-05	21:00:00	19	3	A	LO	A3
2015-11-05	22:54:00	17	2	A	LO	A9
2015-11-05	23:00:00	22	3	A	LO	A5
2015-11-05	23:06:00	11	2	A	LO	A11
2015-11-05	23:33:00	1	3	A	LO	A13
2015-11-06	00:10:00	18	3	A	LO	Z6
2015-11-06	01:03:00	23	2	A	LO	Z4
2015-11-06	05:15:00	21	3	A	LO	G9
2015-11-06	21:10:00	21	2	A	LO	IS
2015-11-07	04:30:00	15	2	A	LO	IS
2015-11-07	04:33:00	14	2	A	LO	IS
2015-11-07	04:37:00	10	2	A	LO	IS
2015-11-07	04:45:00	7	2	A	LO	IS
2015-11-07	21:45:00	19	2	A	LO	B2
2015-11-07	23:40:00	15	2	A	LO	R21
2015-11-08	01:30:00	22	3	S	LO	IS
2015-11-08	02:00:00	25	3	A	LO	IS
2015-11-08	02:30:00	23	2	A	LO	IS
2015-11-08	22:30:00	6		SF	LO
2015-11-08	22:50:00	4	2	S	LO
2015-11-10	05:30:00	21	3	A	LO	R21
2015-11-10	20:30:00	21	2	A	LO	R21
2015-11-10	23:30:00		3	A	LO	IS
2015-11-11	03:04:00	21	2	A	LO	IS
2015-11-11	03:22:00	14	2	A	LO	R15
2015-11-11	03:30:00	11	2	S	LO
2015-11-11	04:40:00	26	2	A	LO	R24
2015-11-12	01:00:00	6	3	A	LO	R22
2015-11-12	01:40:00	23	2	S	LO
2015-11-12	05:15:00	10		SF	LO
2015-11-13	00:15:00	23	2	S	LO
2015-11-13	00:20:00		2	A	LO	IS
2015-11-13	00:20:00	23	3	D	LO
2015-11-13	01:00:00	1	2	A	LO	R
2015-11-13	04:30:00	13	2	A	LO	R23
2015-11-13	04:50:00	17	3	S	LO
2015-11-15	02:40:00	21	2	NA	LO	IS
2015-11-17	02:52:00	11	2	A	LO	IS
2015-11-17	03:07:00	9	2	A	LO	IS
2015-11-17	03:09:00	9	2	A	LO	IS
2015-11-17	03:17:00	6	2	A	LO	IS
2015-11-18	03:00:00	21	2	A	LO	IS
2015-11-18	03:00:00	21	3	A	LO	IS
2015-11-18	03:15:00	19	3	A	LO	IS
2015-11-18	03:15:00	19	3	A	LO	IS
2015-11-18	03:15:00	19	3	A	LO	IS
2015-11-18	03:30:00	14	3	S	LO	IS
2015-11-18	03:30:00	14	3	S	LO	IS
2015-11-18	03:35:00	12	3	S	LO	IS
2015-11-18	03:35:00	12	3	S	LO	IS
2015-11-18	04:15:00	10	2	S	LO	IS
2015-11-18	04:15:00	10	3	S	LO	IS
2015-11-18	04:30:00	15	3	S	LO	IS
2015-11-18	04:30:00	15	3	S	LO	IS
2015-11-18	05:00:00	21	3	A	LO	IS
2015-11-18	05:00:00	21	3	A	LO	IS
2015-11-18	22:10:00	23	2	A	LO	IS
2015-11-18	22:45:00	27	3	S	LO
2015-11-18	23:30:00	24	3	A	LO	R23
2015-11-18	23:45:00	24	2	A	LO	R23
2015-11-19	18:50:00	9	2	A	LO	R17
2015-11-19	21:15:00	19	2	A	LO	R19
2015-11-19	21:50:00	13	3	NA	LO
2015-11-19	22:00:00	9	2	S	LO
2015-11-19	22:30:00	1	1	A	LO
2015-11-19	22:35:00	1	3	A	LO
2015-11-19	23:31:00	1	2	A	LO
2015-11-19	23:40:00	29	2	SF	LO
2015-11-19		19	2	A	LO	IS
2015-11-20	19:30:00	14	3	A	LO	IS
2015-11-20	20:05:00	15	3	NA	LO
2015-11-20	20:25:00	18	3	A	LO	R19
2015-11-20	20:40:00	18	3	A	LO	R19
2015-11-20		27	3	A	LO	R
2015-11-21	05:40:00	4	2	S	LO
2015-11-21	05:41:00	3	2	A	LO	R5
2015-11-22	00:15:00	1	3	S	LO
2015-11-23	00:09:00	21	2	A	LO	R5
2015-11-23	01:30:00	17	3	S	LO
2015-11-23	01:45:00	17	3	S	LO
2015-11-23	02:00:00	19	3	A	LO	IS
2015-11-23	02:00:00	22	3	A	LO	R23
2015-11-23	02:10:00	16	3	A	LO	IS
2015-11-23	02:25:00	11	2	A	LO	IS
2015-11-23	05:15:00	18	2	S	LO
2015-11-24	22:50:00	8	2	A	LO	R
2015-11-25	23:52:00	6	2	A	LO	R21
2015-11-26	04:20:00		2	A	LO	R
2015-11-27	00:27:00	7	2	A	LO	R10
2015-11-30	02:10:00	18	2	A	LO	R18
2015-11-30	03:30:00	23	2	A	LO	R23
2015-12-01	03:10:00	15	2	S	LO
2015-12-01	03:30:00	8	3	A	LO	R17
2015-12-01	04:50:00	21	3	S	LO
2015-12-01	04:55:00	22	2	A	LO	R
2015-12-01	20:56:00	9	3	ND	LO
2015-12-01	21:30:00	17	3	A	LO	R20
2015-12-02	03:55:00	16	2	A	LO	IS
2015-12-02	04:15:00	15	2	S	LO
2015-12-02	04:20:00	11	2	A	LO	R20
2015-12-02	04:42:00	4	2	A	LO	R20
2015-12-02	21:05:00	5	2	A	LO
2015-12-02	21:34:00	1	2	A	LO	R20
2015-12-03	05:15:00	21	2	D	LO	IS
2015-12-03	06:30:00	7	2	DS	LO
2015-12-03	06:30:00	7	2	S	LO
2015-12-03	06:40:00	2	2	S	LO
2015-12-03	20:32:00	14	2	A	LO	IS
2015-12-04	21:19:00	2	2	A	LO	R15
2015-12-04	23:50:00	13	2	A	LO	R19
2015-12-05	05:15:00	10	2	A	LO	IS
2015-12-05	20:49:00	3	2	A	LO	R20
2015-12-05	22:00:00	24	2	S	LO
2015-12-07	00:25:00	11	2	A	LO	R12
2015-12-07	01:10:00		2	ND	LO
2015-12-07	02:20:00	20	3	A	LO	R
2015-12-07	05:20:00	25	3	SF	LO
2015-12-08	05:00:00	18	3	SF	LO
2015-12-08	05:10:00	11	2	S	LO
2015-12-08	05:15:00	4	2	S	LO
2015-12-09	03:00:00	12	2	A	LO	R17
2015-12-09	03:30:00	22	3	A	LO	R26
2015-12-12	00:43:00	17	2	A	LO	R
2015-12-12	01:10:00	15	2	ND	LO
2015-12-14	01:00:00	23	2	A	LO	R28

## Sheet: CDO 2016
Date	Time	Sector	Zone	NestingEvent	Species	HatcheryLocation
2016-08-06	23:15:00	24	1	SF	DC
2016-07-06	03:52:00	24	2	A	LO	A3
2016-07-06	06:50:00	2	2	A	LO	IS
2016-07-08	20:02:00	3	2	A	LO	A1
2016-07-09	04:14:00	23	2	A	LO	A2
2016-07-10	21:40:00		3	SF	LO
2016-07-11	05:05:00	1	3	A	LO	A5
2016-07-12	04:12:00	9	2	A	LO	A7
2016-07-18	02:02:00	12	2	A	LO	A9
2016-07-18	02:15:00	9	2	A	LO	A11
2016-07-18	08:00:00	20	2	S	LO
2016-07-18	23:48:00	11	2	A	LO	A13
2016-07-19	01:11:00	18	3	A	LO	A15
2016-07-20	03:59:00	28	2	A	LO	A17
2016-07-21	00:57:00	27	2	A	LO	B2
2016-07-21	02:20:00	9	2	A	LO	B4
2016-07-21	04:10:00	23	2	S	LO
2016-07-26	20:43:00	1	2	A	LO	B6
2016-07-28	20:15:00	13	3	A	LO	B8
2016-07-28	21:03:00	14	2	A	LO	B10
2016-07-29	05:10:00	6	2	A	LO	B12
2016-07-29	05:40:00	27	2	A	LO
2016-07-30	05:22:00	27	2	S	LO
2016-07-30	05:42:00	6	2	S	LO
2016-07-30	23:42:00	1	3	A	LO	B14
2016-08-02	01:05:00	21	2	A	LO	B16
2016-08-02	01:15:00	21	3	A	LO	C1
2016-08-02	01:52:00	20	2	A	LO	C3
2016-08-02	02:16:00	13	2	A	LO	C5
2016-08-02	04:56:00	25	2	A	LO	C7
2016-08-02	05:20:00	12	3	A	LO	C9
2016-08-03	02:58:00	28		ND	LO
2016-08-05	02:12:00	27	2	A	LO	C11
2016-08-09	05:15:00	7	2	S	LO
2016-08-12	01:13:00	11	2	A	LO	C13
2016-08-13	19:42:00	23	2	NA	LO
2016-08-13	22:34:00	1	2	A	LO	C15
2016-08-14	05:00:00	13	2	A	LO	C17
2016-08-14	06:30:00	23	2	SF	LO
2016-08-16	00:22:00	20	2	DS	LO	D2
2016-08-16	02:31:00	1	3	A	LO	D4
2016-08-16	02:45:00	11	2	A	LO	D6
2016-08-17	00:40:00	19	1	SF	LO
2016-08-17	23:10:00	5	2	A	LO	D8
2016-08-17	23:47:00	2	2	A	LO	D10
2016-08-17	23:50:00	1	2	A	LO	D12
2016-08-18	00:42:00	13	2	A	LO	D14
2016-08-19	00:47:00	9	3	A	LO	D16
2016-08-19	01:09:00	3	2	SF	LO
2016-08-19	04:30:00	9	3	A	LO	E1
2016-08-19	04:45:00	7	2	A	LO	E3
2016-08-19	05:30:00	25	2	A	LO	E5
2016-08-20	00:08:00	20	2	A	LO	E7
2016-08-20	00:15:00	19	3	A	LO	E9
2016-08-21	02:55:00	22	3	A	LO	E11
2016-08-21	03:29:00	24	2	A	LO	E13
2016-08-22	20:12:00	12	2	A	LO	E15
2016-08-22	20:36:00	17	3	A	LO	E17
2016-08-22	20:53:00	21	2	A	LO	F1
2016-08-23	02:36:00	17	3	SF	LO
2016-08-23	20:29:00	3	2	A	LO	F3
2016-08-23	20:55:00	1	3	A	LO	F5
2016-08-24	03:25:00	26	3	A	LO	F7
2016-08-24	04:13:00	4	2	A	LO	F9
2016-08-24	20:26:00	24	2	A	LO	F11
2016-08-24	21:28:00	4	2	A	LO	F13
2016-08-25	06:23:00	29	3	SF	LO
2016-08-25	20:31:00	2	3	A	LO	F15
2016-08-25	21:28:00	15	3	SF	LO
2016-08-25	22:00:00	20	2	A	LO	F17
2016-08-25	23:56:00	4	3	A	LO	G2
2016-08-26	00:29:00	3	3	S	LO
2016-08-26	00:51:00	10	3	A	LO	G4
2016-08-26	04:26:00	19	2	A	LO	G6
2016-08-26	04:49:00	12	2	A	LO	G8
2016-08-26	05:10:00	15	3	A	LO	G10
2016-08-26	05:30:00	0	2	S	LO
2016-08-27	05:41:00	11	2	A	LO	G12
2016-08-27	05:49:00	2	2	A	LO	G14
2016-08-27	06:00:00	20	3	A	LO	G16
2016-08-27	20:00:00	8	3	A	LO	H1
2016-08-27	21:18:00	4	3	A	LO	H3
2016-08-27	21:18:00	4	3	A	LO	H5
2016-08-30	05:40:00	14	3	A	LO	H7
2016-08-30	05:46:00	13	3	A	LO	H9
2016-08-30	05:51:00	12	3	A	LO	H11
2016-08-30	06:00:00	28	2	SF	LO
2016-08-30	06:03:00	30	3	SF	LO
2016-08-30	06:05:00	31	2	SF	LO
2016-08-30	06:07:00	35	2	SF	LO
2016-08-31	05:14:00	12	3	A	LO	H13
2016-08-31	05:20:00	10	2	A	LO	H15
2016-08-31	05:29:00	7	3	SF	LO
2016-08-31	05:40:00	22	2	A	LO	H17
2016-08-31	05:47:00	22	3	A	LO	I2
2016-08-31	05:57:00	27	2	A	LO	I4
2016-09-02	00:29:00	14	2	A	LO	I6
2016-09-03	05:08:00	15	3	A	LO	I8
2016-09-03	05:32:00	14	2	A	LO	I10
2016-09-03	05:59:00	4	2	S	LO
2016-09-03	06:05:00	3	2	A	LO	I12
2016-09-03	07:04:00	21	3	A	LO	I14
2016-09-03	08:08:00	28	2	DS	LO
2016-09-04	01:19:00	15	2	S	LO
2016-09-04	01:33:00	7		SF	LO
2016-09-04	05:13:00	2	2	A	LO	I16
2016-09-04	05:29:00	8	3	A	LO	A2
2016-09-04	19:53:00	15	2	S	LO
2016-09-04	20:15:00	23	2	A	LO	A4
2016-09-05	02:19:00	16	2	SF	LO
2016-09-05	02:21:00	15	2	DS	LO	A6
2016-09-05	02:39:00	11	2	S	LO
2016-09-05	03:46:00	3	2	A	LO	A8
2016-09-05	04:50:00	18	2	A	LO	A10
2016-09-06	03:51:00	7	2	A	LO	A12
2016-09-06	04:17:00	2	2	A	LO	A14
2016-09-06	04:59:00	14	2	A	LO	A16
2016-09-06	19:43:00	6	2	A	LO	B1
2016-09-06	20:43:00	18	2	A	LO	B3
2016-09-07	03:10:00	20	2	S	LO
2016-09-07	20:18:00	17	2	A	LO	B5
2016-09-07	21:17:00	24	2	A	LO	B9
2016-09-07	21:19:00	16	2	A	LO	B7
2016-09-07	22:00:00	34	2	A	LO	B11
2016-09-07	22:10:00	34	2	A	LO	B13
2016-09-08	03:55:00	10	2	S	LO
2016-09-08	20:02:00	11	1	A	LO	B15
2016-09-08	20:27:00	4	2	A	LO	B17
2016-09-08	21:10:00	8	2	A	LO	C2
2016-09-08	21:25:00	23	2	A	LO	C6
2016-09-08	22:19:00	22	3	A	LO	C8
2016-09-09	03:30:00	11	2	S	LO
2016-09-09	03:48:00	7	2	S	LO
2016-09-09	04:01:00	2	2	S	LO
2016-09-09	04:05:00	1	2	S	LO
2016-09-09	21:09:00	22	2	A	LO	C10
2016-09-10	03:43:00	15	2	A	LO	C12
2016-09-10	19:15:00	15	2	S	LO
2016-09-10	22:16:00	26	1	SF	LO
2016-09-10	22:37:00	25	2	S	LO
2016-09-11	00:40:00	17	2	A	LO	C14
2016-09-11	01:46:00	16	2	A	LO	C16
2016-09-11	20:12:00	11	2	A	LO	D1
2016-09-11	23:01:00	21	3	A	LO	D3
2016-09-12	00:10:00	11	2	A	LO	D5
2016-09-12	00:45:00	3	2	A	LO	D7
2016-09-12	01:10:00	2	2	S	LO
2016-09-12	05:10:00	13	2	A	LO	D9
2016-09-12	23:49:00	24	3	S	LO
2016-09-15	00:20:00	29	3	NA	LO
2016-09-15	01:05:00	14	2	A	LO	D11
2016-09-15	02:30:00	13	2	A	LO	D13
2016-09-16	22:40:00	17	2	A	LO	D15
2016-09-16	23:41:00	5	2	A	LO	D17
2016-09-19	00:42:00	10	2	A	LO	E2
2016-09-19	02:26:00	29	3	SF	LO
2016-09-19	21:52:00	28	2	A	LO	E4
2016-09-21	19:57:00	11	3	A	LO	E6
2016-09-22	03:35:00	23	2	A	LO	E14
2016-09-22	20:30:00	5	2	A	LO	E8
2016-09-22	22:32:00	29	2	A	LO	E10
2016-09-23	04:17:00	23	2	A	LO	E12
2016-09-24	04:41:00	3	2	A	LO	E16
2016-09-24	21:25:00	9	2	A	LO	F2
2016-09-24	23:33:00	27	3	A	LO	F4
2016-09-24	23:44:00	6	2	S	LO
2016-09-24	23:51:00	5	3	S	LO	IS
2016-09-25	01:03:00	18	3	A	LO	F6
2016-09-25	23:43:00	11	2	NA	LO
2016-09-26	21:58:00	14	3	A	LO	F8
2016-09-26	23:40:00	5	2	A	LO	F10
2016-09-27	00:57:00	8	2	A	LO	F12
2016-09-27	21:50:00	14	2	SF	LO
2016-09-27	22:15:00	2	1	A	LO	F14
2016-09-28	01:27:00	20	2	A	LO	F16
2016-09-28	04:45:00	37	2	AD	LO	G1
2016-09-28	22:07:00	3	2	A	LO	G3
2016-09-30	03:35:00	2	3	A	LO	G5
2016-10-01	01:15:00	6	2	A	LO	G7
2016-10-01	02:00:00	12	2	A	LO	G9
2016-10-01	03:53:00	28	2	A	LO	G11
2016-10-01	04:19:00	19	2	A	LO	G13
2016-10-01	04:45:00	12	2	A	LO	G15
2016-10-02	00:09:00	5	2	A	LO	G17
2016-10-02	02:40:00	21	2	A	LO	H2
2016-10-03	20:12:00	6	2	A	LO	H4
2016-10-03	21:20:00	4	3	A	LO	H6
2016-10-04	02:43:00	28	2	A	LO	H8
2016-10-04	04:50:00	1	2	A	LO	H10
2016-10-04	07:27:00	43	2	A	LO	H14
2016-10-04	12:10:00	22	2	A	LO	H12
2016-10-04	20:03:00	21	2	A	LO	H16
2016-10-04	21:10:00	22	2	A	LO	I1
2016-10-04	21:37:00	24	3	S	LO
2016-10-05	02:20:00	16	2	A	LO	I3
2016-10-05	04:48:00	20	2	A	LO	I5
2016-10-05	22:22:00	20	1	SF	LO
2016-10-08	05:30:00	15	2	S	LO
2016-10-09	06:07:00	16	3	A	LO	I7
2016-10-09	21:00:00	22	3	A	LO	I9
2016-10-09	21:40:00	12	1	NA	LO
2016-10-10	05:58:00	26	1	A	LO	I11
2016-10-10	22:55:00	15	2	A	LO	I13
2016-10-10	23:30:00	21	2	A	LO	I15
2016-10-11	04:45:00	15	2	A	LO	I17
2016-10-11	20:42:00	1	2	A	LO	A1
2016-10-11	23:19:00	4	3	A	LO	A3
2016-10-12	04:42:00	14	2	A	LO	A5
2016-10-12	04:50:00	11	2	A	LO	A7
2016-10-13	00:37:00	5	2	A	LO	A9
2016-10-13	20:31:00	19	2	A	LO	A11
2016-10-14	03:11:00	22	3	A	LO	A13
2016-10-14	23:05:00	20	2	A	LO	A15
2016-10-15	02:25:00	23	3	A	LO	A17
2016-10-15	22:55:00	6	2	A	LO	B2
2016-10-16	22:55:00	5	2	A	LO	B4
2016-10-17	19:45:00	15	2	S	LO
2016-10-17	19:50:00	11	2	A	LO	B6
2016-10-18	01:39:00	11	2	A	LO	B8
2016-10-18	02:16:00	19	3	A	LO	B10
2016-10-18	06:14:00	11	3	S	LO
2016-10-19	02:07:00	25	2	S	LO
2016-10-19	20:21:00	20	3	A	LO	B12
2016-10-19	20:45:00	14	3	S	LO
2016-10-19	21:05:00	20	3	A	LO	B14
2016-10-20	03:05:00	24	2	A	LO	B16
2016-10-20	03:15:00	27	2	A	LO	C1
2016-10-21	02:05:00	20	2	S	LO
2016-10-21	02:11:00	18	2	A	LO	C3
2016-10-21	02:25:00	12	2	A	LO	C5
2016-10-21	02:46:00	7	2	A	LO	C7
2016-10-21	03:05:00	6	2	A	LO	C9
2016-10-21	03:44:00	2	2	A	LO	C11
2016-10-21	19:30:00	24	2	A	LO	C15
2016-10-21	19:35:00	21	3	A	LO	C13
2016-10-21	20:05:00	22	3	S	LO
2016-10-21	20:17:00	20	2	A	LO	C17
2016-10-21	20:30:00	16	2	S	LO
2016-10-21	20:38:00	12	3	S	LO
2016-10-21	20:38:00	12	2	S	LO
2016-10-21	20:38:00	12	2	S	LO
2016-10-21	20:43:00	10	3	SF	LO
2016-10-21	20:48:00	7	2	S	LO
2016-10-21	20:51:00	6	2	SF	LO
2016-10-21	20:53:00	4	2	S	LO
2016-10-21	21:00:00	3	2	S	LO
2016-10-22	02:29:00	11	3	S	LO
2016-10-22	22:20:00	11	2	A	LO	D2
2016-10-23	19:53:00	4	2	A	LO	D4
2016-10-24	04:40:00	19	2	A	LO	D8
2016-10-24	05:07:00	2	1	A	LO	D6
2016-10-24	06:00:00	28	2	SF	LO
2016-10-25	05:20:00	19	2	S	LO
2016-10-25	05:23:00	14	2	S	LO
2016-10-25	05:40:00	25	2	S	LO
2016-10-25	05:45:00	28	2	SF	LO
2016-10-26	01:11:00	12	2	A	LO	D10
2016-10-26	05:20:00	2	2	A	LO	D12
2016-10-26	05:45:00	14	2	S	LO
2016-10-26	21:30:00	10	3	A	LO	R
2016-10-26	22:55:00	21	3	A	LO	IS
2016-10-26	23:35:00	24	2	A	LO	R
2016-10-27	00:39:00	1	2	D	LO	R
2016-10-27	04:52:00	10	2	S	LO
2016-10-29	02:40:00	10	2	D	LO
2016-10-29	02:55:00	3	2	A	LO	R
2016-10-29	20:35:00	19	2	A	LO	IS
2016-10-29	1900-01-01 08:54:00	2	1	A	LO	R
2016-10-30	05:14:00	2	2	A	LO
2016-10-30	05:27:00	3	3	A	LO
2016-10-31	02:14:00	16	2	S	LO
2016-11-01	00:10:00	1	1	A	LO	R
2016-11-03	02:39:00	19	3	A	LO	IS
2016-11-03	06:02:00	10	2	D	LO
2016-11-03	06:05:00	12	2	A	LO
2016-11-04	18:24:00	8	1	A	LO	R
2016-11-05	18:44:00	13	1	S	LO
2016-11-05	19:50:00	15	2	A	LO	R
2016-11-06	02:57:00	11	2	A	LO	R
2016-11-06	06:47:00	33	2	S	LO
2016-11-06	07:12:00	38	2	S	LO
2016-11-06	07:15:00	40	2	D	LO
2016-11-06	07:24:00	41	2	D	LO
2016-11-07	02:06:00	19	2	A	LO	R
2016-11-07	02:33:00	12	3	A	LO	R
2016-11-08	05:34:00	6	2	A	LO	R
2016-11-08	05:41:00	7	1	A	LO	R
2016-11-11	03:05:00	10	1	SF	LO
2016-11-11	22:34:00	23	2	A	LO	R
2016-11-12	01:35:00	5	2	A	LO	R
2016-11-12	05:43:00	19	2	A	LO	R
2016-11-12	21:32:00	8	2	A	LO	R
2016-11-12	23:30:00	22	3	S	LO
2016-11-12	23:45:00	30	2	A	LO	R
2016-11-14	05:15:00	20	3	S	LO
2016-11-15	23:25:00	6	2	S	LO
2016-11-16	05:54:00	25	3	A	LO	R
2016-11-16	20:56:00	19	2	A	LO	R
2016-11-17	00:47:00	16	2	A	LO	R
2016-11-17	21:17:00	20	2	A	LO	R
2016-11-18	02:25:00	22	3	A	LO	R
2016-11-18	02:43:00	23	3	SF	LO
2016-11-19	03:30:00	7	1	A	LO	R
2016-11-19	04:05:00	9	2	A	LO	R
2016-11-19	20:35:00	16	2	SF	LO
2016-11-19	21:39:00	24	2	SF	LO
2016-11-19	21:56:00	22	3	SF	LO
2016-11-20	06:39:00	8	2	SF	LO	R
2016-11-20	20:46:00	7	3	A	LO	R
2016-11-20	20:55:00	7	3	A	LO	R
2016-11-21	05:35:00	5	1	SF	LO
2016-11-22	05:10:00	20	2	A	LO	IS
2016-11-22	05:20:00	18	2	A	LO	R
2016-11-22	05:25:00	18	2	A	LO	R
2016-11-22	05:40:00	3	2	SF	LO
2016-11-22	23:36:00	13	2	A	LO	R
2016-11-23	05:10:00	25	2	S	LO
2016-11-24	00:34:00	24	2	A	LO	R
2016-11-25	06:00:00	13	2	A	LO	IS
2016-11-26	00:40:00	19	2	A	LO	R
2016-11-26	05:25:00	9	2	A	LO	R
2016-11-26	05:30:00	5	2	A	LO	R
2016-11-26	05:40:00	2	2	A	LO	R
2016-11-27	05:16:00	14	2	S	LO
2016-11-27	05:24:00	11	2	A	LO	R
2016-11-27	05:36:00	25	2	S	LO
2016-11-27	05:40:00	27	2	D	LO
2016-11-28	05:14:00	3	2	A	LO	R
2016-11-29	05:16:00	2	2	S	LO
2016-11-29	05:22:00	3	2	S	LO
2016-11-29	05:26:00	5	2	S	LO
2016-11-29	05:40:00	8	1	S	LO
2016-11-29	05:50:00	12	2	S	LO
2016-11-29	05:54:00	12	3	S	LO
2016-12-04	05:06:00	12	2	A	LO
2016-12-05	05:30:00	17	2	S	LO
2016-12-05	05:38:00	14	2	S	LO

## Sheet: CDO 2017
Date	Time	Sector	Zone	NestingEvent	Species	HatcheryLocation
2017-06-23	05:09:00	26	2	A	LO	IS
2017-06-24	05:58:00	21	3	A	LO	IS
2017-06-25	23:11:00	11	3	SF	LO
2017-06-28	05:42:00	13	3	A	LO	IS
2017-06-28	05:52:00	21	3	A	LO	IS
2017-06-30	07:00:00	21	3	A	LO	IS
2017-07-01	23:58:00	1	2	A	LO	IS
2017-07-02	06:02:00	17	2	SF	LO
2017-07-02	08:14:00	31	2	S	LO
2017-07-05	00:01:00	21	2	A	LO	R#21
2017-07-06	23:21:00	8	2	D	LO	R#8
2017-07-07	04:24:00	12	2	A	LO	R#12
2017-07-08	00:29:00	23	2	A	LO	R#23
2017-07-10	21:15:00	12	3	A	LO	A1
2017-07-10	22:22:00	14	2	A	LO	A3
2017-07-12	21:45:00	14	2	A	LO	A5
2017-07-13	02:08:00	27	3	A	LO	A7
2017-07-13	22:19:00	14	2	A	LO	A9
2017-07-15	01:27:00	27	2	A	LO	A11
2017-07-15	02:16:00	14	3	S	LO
2017-07-16	02:10:00	5	2	A	LO	B4
2017-07-16	02:22:00	2	3	A	LO	A13
2017-07-16	03:10:00	7	2	A	LO	B2
2017-07-16	22:43:00	2	2	A	LO	B6
2017-07-17	22:45:00	16	2	A	LO	B8
2017-07-18	00:01:00	3	2	A	LO	B10
2017-07-18	01:04:00	21	3	A	LO	B12
2017-07-18	20:40:00	4	2	A	LO	B14
2017-07-19	00:29:00	18	2	A	LO	C1
2017-07-20	01:13:00	10	2	A	LO	C3
2017-07-20	02:20:00	5	2	S	LO
2017-07-20	04:31:00	21	3	A	LO	C5
2017-07-20	06:25:00	9	2	A	LO	C7
2017-07-20	08:57:00	9	2	SF	LO
2017-07-21	05:17:00	18	3	A	LO	C9
2017-07-22	05:19:00	12	3	S	LO
2017-07-22	05:32:00	6	2	A	LO	C11
2017-07-23	05:15:00	13	3	A	LO	C13
2017-07-23	05:29:00	10	2	A	LO	D2
2017-07-24	05:48:00	2	3	A	LO	D4
2017-07-25	00:30:00	14	3	A	LO	D6
2017-07-25	05:20:00	13	3	A	LO	D8
2017-07-26	21:22:00	12	2	A	LO	D10
2017-07-27	03:56:00	22	3	NA	LO
2017-07-27	21:11:00	6	2	A	LO	D12
2017-07-27	22:00:00	20	3	A	LO	D14
2017-07-28	21:18:00	15	3	NA	LO
2017-07-28	21:27:00	12	2	A	LO	E1
2017-07-28	21:57:00	21	2	A	LO	E3
2017-07-28	23:07:00	5	2	SF	LO
2017-07-29	20:58:00	21	2	A	LO	E5
2017-07-29	22:00:00	9	3	SF	LO
2017-07-29	22:48:00	27	3	S	LO
2017-07-29	22:55:00	28	3	SF	LO
2017-07-29	23:59:00	4	2	A	LO	E7
2017-07-30	05:07:00	18	2	SF	LO
2017-07-30	06:09:00	22	3	A	LO	E9
2017-07-30	23:05:00	7	2	A	LO	E11
2017-07-30	23:50:00	6	2	A	LO	E13
2017-07-31	00:13:00	9	2	A	LO	F2
2017-07-31	00:29:00	14	2	NA	LO
2017-07-31	01:53:00	13	2	A	LO	F4
2017-07-31	03:00:00	3	3	NA	LO
2017-07-31	03:18:00	2	2	A	LO	F6
2017-07-31	05:34:00	2	2	A	LO	F8
2017-07-31	06:06:00	13	3	A	LO	F10
2017-07-31	06:28:00	21	2	A	LO	F12
2017-07-31	06:38:00	27	2	A	LO	F14
2017-07-31	23:11:00	19	2	A	LO	G1
2017-08-01	00:37:00	3	2	A	LO	G3
2017-08-01	02:33:00	15	2	A	LO	G5
2017-08-01	04:38:00	22	3	A	LO	G7
2017-08-01	05:01:00	27	2	SF	LO
2017-08-01	19:54:00	2	3	A	LO	G9
2017-08-02	00:23:00	10	2	A	LO	G11
2017-08-02	00:59:00	1	2	SF	LO
2017-08-02	05:29:00	13	2	A	LO	G13
2017-08-03	01:21:00	6	2	A	LO	H2
2017-08-03	05:53:00	14	2	S	LO
2017-08-03	06:08:00	18	2	A	LO	H4
2017-08-04	05:41:00	2	2	A	LO	H6
2017-08-04	06:01:00	4	2	S	LO
2017-08-04	06:54:00	29	3	A	LO	H8
2017-08-04	22:40:00	10	2	A	LO	H10
2017-08-05	23:24:00	13	3	NA	LO
2017-08-06	00:16:00	9	2	A	LO	H12
2017-08-06	05:01:00	21	2	A	LO	H14
2017-08-06	05:35:00	7	2	A	LO	A2
2017-08-07	00:40:00	21	3	SF	LO
2017-08-07	05:21:00	16	2	A	LO	A4
2017-08-07	05:55:00	4	2	S	LO
2017-08-07	22:50:00	11	2	NA	LO
2017-08-08	01:48:00	9	2	A	LO	A6
2017-08-08	02:10:00	3	2	A	LO	A8
2017-08-08	02:17:00	2	2	A	LO	A10
2017-08-08	23:03:00	1	2	A	LO	A12
2017-08-09	02:37:00	10	2	A	LO	A14
2017-08-09	22:38:00	25	2	SF	LO
2017-08-09	23:22:00	9	3	NA	LO
2017-08-11	02:09:00	21	3	NA	LO
2017-08-11	02:15:00	19	2	S	LO
2017-08-11	02:21:00	18	2	S	LO	R#18
2017-08-11	02:46:00	12	2	S	LO
2017-08-11	02:53:00	10	2	S	LO
2017-08-11	03:03:00	5	2	S	LO
2017-08-12	05:22:00	5	2	A	LO	B1
2017-08-12	20:30:00	2	2	A	LO	B3
2017-08-12	21:35:00	24	2	A	LO	B5
2017-08-12	22:15:00	16	2	SF	LO
2017-08-12	22:31:00	9	2	SF	LO
2017-08-12	23:05:00	13	2	A	LO	B7
2017-08-13	05:36:00	14	2	S	LO
2017-08-13	05:53:00	23	2	A	LO	B9
2017-08-13	21:37:00	2	3	A	LO	B11
2017-08-13	22:19:00	9	2	A	LO	B13
2017-08-13	22:20:00	9	2	A	LO	C2
2017-08-13	22:48:00	14	2	NA	LO
2017-08-13	22:50:00	13	2	A	LO	C4
2017-08-13	23:20:00	21	2	S	LO
2017-08-14	00:05:00	27	3	S	LO
2017-08-14	20:26:00	27	3	SF	LO
2017-08-14	21:31:00	15	2	A	LO	C6
2017-08-14	21:52:00	17	2	A	LO	C8
2017-08-14	22:40:00	19	3	A	LO	C10
2017-08-14	23:55:00	23	2	A	LO	C12
2017-08-15	00:18:00	19	2	A	LO	C14
2017-08-15	00:57:00	10	2	A	LO	D1
2017-08-15	00:57:00	10	2	SF	LO
2017-08-15	05:24:00	14	2	A	LO	D3
2017-08-15	06:26:00	1	3	A	LO	D5
2017-08-15	22:09:00	13	2	A	LO	D7
2017-08-15	22:23:00	12	3	A	LO	D9
2017-08-15	22:41:00	3	2	A	LO	D11
2017-08-15	22:50:00	2	2	A	LO	D13
2017-08-15	23:02:00	0	2	A	LO	E2
2017-08-16	00:52:00	27	3	SF	LO
2017-08-16	01:15:00	19	2	A	LO	E4
2017-08-16	02:00:00	19	2	NA	LO
2017-08-16	02:42:00	5	3	NA	LO
2017-08-16	05:36:00	16	2	SF	LO
2017-08-16	22:44:00	17	2	A	LO	E6
2017-08-16	23:05:00	21	3	A	LO	E8
2017-08-16	23:55:00	13	3	NA	LO
2017-08-17	01:42:00	15	2	A	LO	E10
2017-08-17	03:13:00	29	2	A	LO	E12
2017-08-18	05:09:00	3	2	S	LO	R#3
2017-08-18	05:28:00	11	3	A	LO	E14
2017-08-19	02:03:00	10	2	A	LO	F1
2017-08-19	02:35:00	7	2	SF	LO
2017-08-19	05:05:00	15	3	NA	LO
2017-08-19	05:30:00	10	2	S	LO
2017-08-20	09:25:00	17	2	D	LO
2017-08-20	09:30:00	15	2	S	LO
2017-08-20	09:33:00	16	3	SF	LO
2017-08-21	02:20:00	13	2	A	LO	F13
2017-08-21	23:08:00	22	2	SF	LO
2017-08-22	00:10:00	13	2	S	LO
2017-08-22	00:17:00	12	2	A	LO	F3
2017-08-22	04:53:00	15	2	A	LO	F5
2017-08-22	05:53:00	23	3	S	LO
2017-08-23	00:41:00	19	2	A	LO	F7
2017-08-24	02:17:00	9	2	A	LO	F9
2017-08-24	06:20:00	22	2	D	LO
2017-08-25	02:09:00	4	2	SF	LO
2017-08-26	02:43:00	19	2	A	LO	F11
2017-08-26	03:06:00	16	2	S	LO
2017-08-26	03:38:00	4	2	A	LO	G2
2017-08-26	03:55:00	4	2	NA	LO
2017-08-28	05:02:00	12	2	S	LO	R#12
2017-08-28	05:09:00	12	3	S	LO
2017-08-28	05:15:00	11	2	A	LO	G4
2017-08-28	05:35:00	4	2	SF	LO
2017-08-28	05:38:00	3	2	A	LO	G6
2017-08-28	05:49:00	1	2	D	LO
2017-08-28	06:20:00	21	2	A	LO	G8
2017-08-28	21:10:00	9	2	A	LO	G10
2017-08-29	04:50:00	11	2	SF	LO
2017-08-29	05:08:00	3	3	A	LO	G12
2017-08-30	05:08:00	13	2	A	LO	G14
2017-08-30	05:24:00	11	2	A	LO	H1
2017-08-30	05:32:00	11	2	A	LO	H3
2017-08-30	05:40:00	7	2	A	LO	H5
2017-08-30	22:45:00	26	2	S	LO
2017-08-30	23:10:00	20	3	NA	LO
2017-08-30	23:26:00	16	3	A	LO	H7
2017-08-30	23:58:00	2	2	S	LO
2017-08-31	05:20:00	8	2	A	LO	H9
2017-08-31	05:48:00	20	2	A	LO	H11
2017-08-31	23:29:00	14	2	S	LO
2017-08-31	23:40:00	13	3	NA	LO
2017-09-01	05:15:00	19	2	S	LO
2017-09-01	05:30:00	17	3	NA	LO
2017-09-01	05:50:00	9	2	S	LO
2017-09-04	06:10:00	8	2	S	LO
2017-09-04	06:20:00	5	2	SF	LO
2017-09-04	23:48:00	12	2	A	LO	H13
2017-09-07	00:05:00	27	2	A	LO	A1
2017-09-07	01:15:00	15	2	A	LO	A3
2017-09-07	01:32:00	11	2	A	LO	A5
2017-09-07	01:48:00	2	2	A	LO	A7
2017-09-08	01:16:00	20	2	SF	LO
2017-09-08	01:43:00	9	2	A	LO	A9
2017-09-09	05:29:00	25	3	A	LO	A11
2017-09-09	07:40:00	10	3	A	LO	A13
2017-09-09	19:58:00	25	2	S	LO
2017-09-09	21:16:00	15	2	A	LO	B2
2017-09-10	05:18:00	24	2	A	LO	B4
2017-09-10	20:40:00	25	2	A	LO	B6
2017-09-10	21:35:00	18	3	SF	LO
2017-09-10	21:48:00	11	3	SF	LO
2017-09-10	22:29:00	13	2	S	LO
2017-09-10	22:34:00	15	2	S	LO	IS
2017-09-11	02:54:00	10	2	A	LO	B8
2017-09-11	20:06:00	20	2	A	LO	B10
2017-09-11	20:42:00	14	2	SF	LO
2017-09-11	20:53:00	10	2	A	LO	B12
2017-09-11	21:48:00	11	2	A	LO	B14
2017-09-12	02:07:00	23	2	NA	LO
2017-09-12	02:12:00	24	2	A	LO	C1
2017-09-12	02:23:00	25	2	NA	LO
2017-09-12	03:12:00	20	3	A	LO	C3
2017-09-12	03:32:00	16	2	D	LO
2017-09-12	03:45:00	10	2	SF	LO
2017-09-12	04:14:00	6	2	A	LO	C5
2017-09-12	21:14:00	14	2	S	LO
2017-09-12	21:17:00	14	2	S	LO
2017-09-12	22:20:00	16	2	A	LO	C7
2017-09-13	07:24:00	23	3	A	LO	C9
2017-09-13	07:45:00	19	2	A	LO	C11
2017-09-13	08:40:00	12	3	A	LO	R12
2017-09-13	22:50:00	24	3	SF	LO
2017-09-13	22:51:00	24	2	NA	LO
2017-09-13	23:00:00	25	3	NA	LO
2017-09-13	23:04:00	25	2	S	LO
2017-09-14	04:58:00	9	2	A	LO	C13
2017-09-14	05:15:00	16	2	SF	LO
2017-09-14	06:00:00	27	2	SF	LO
2017-09-14	22:37:00	1	2	SF	LO
2017-09-14	23:56:00	27	2	S	LO
2017-09-15	04:30:00	19	3	SF	LO
2017-09-15	04:33:00	18	2	S	LO
2017-09-15	04:38:00	14	2	S	LO
2017-09-15	04:44:00	13	2	S	LO
2017-09-15	05:31:00	20	2	A	LO	D2
2017-09-15	05:48:00	22	2	SF	LO
2017-09-15	05:50:00	24	3	A	LO	D4
2017-09-16	04:30:00	18	2	A	LO	D6
2017-09-16	04:35:00	15	2	S	LO
2017-09-16	04:56:00	6	2	S	LO
2017-09-16	05:00:00	9	2	S	LO
2017-09-16	05:08:00	11	2	S	LO
2017-09-16	05:17:00	18	2	A	LO	D8
2017-09-16	22:02:00	12	2	A	LO	D10
2017-09-16	22:43:00	21	2	A	LO	D12
2017-09-17	05:10:00	19	3	NA	LO
2017-09-17	05:20:00	12	3	S	LO
2017-09-17	05:50:00	16	2	S	LO
2017-09-17	06:00:00	17	3	A	LO	D14
2017-09-17	22:35:00	12	2	S	LO
2017-09-17	23:20:00	18	2	A	LO	R#18
2017-09-18	01:34:00	19	2	A	LO	R#19
2017-09-18	03:22:00	4	2	A	LO	R#4
2017-09-18	05:16:00	22	2	A	Lo	R#22
2017-09-18	22:33:00	25	2	A	LO	E1
2017-09-19	03:15:00	21	2	A	LO	E3
2017-09-19	03:38:00	19	2	A	LO	R#19
2017-09-19	04:22:00	14	2	SF	LO
2017-09-19	04:32:00	11	2	A	LO	R#11
2017-09-19	23:04:00	20	2	A	LO	E5
2017-09-19	23:21:00	22	2	NA	LO
2017-09-19	23:56:00	21	2	A	LO	E7
2017-09-20	00:17:00	19	2	A	LO	R#19
2017-09-20	00:44:00	18	2	NA	LO
2017-09-20	05:50:00	16	2	S	LO
2017-09-20	05:51:00	17	2	S	LO
2017-09-20	06:01:00	12	2	SF	LO
2017-09-21	00:02:00	22	2	A	LO	E9
2017-09-21	00:40:00	6	2	A	LO	E11
2017-09-21	01:47:00	12	3	A	LO	E13
2017-09-21	02:08:00	18	3	A	LO	F2
2017-09-21	03:17:00	21	1	A	LO	F4
2017-09-21	05:22:00	1	3	A	LO	R#1
2017-09-21	05:45:00	5	2	SF	LO
2017-09-21	06:08:00	16	2	S	LO
2017-09-21	06:10:00	17	2	D	LO
2017-09-21	06:39:00	27	2	S	LO
2017-09-21	19:24:00	6	2	NA	LO
2017-09-21	19:56:00	5	2	A	LO	F6
2017-09-22	20:00:00	1	2	SF	LO
2017-09-23	01:52:00	13	2	S	LO
2017-09-23	02:46:00	13	2	S	LO
2017-09-23	02:57:00	18	2	S	LO
2017-09-24	02:30:00	11	2	SF	LO
2017-09-24	02:34:00	10	2	A	LO	R#10
2017-09-24	05:20:00	25	2	A	LO	F8
2017-09-25	03:04:00	1	2	SF	LO
2017-09-26	03:00:00	11	2	A	LO	F10
2017-09-26	03:40:00	1	2	A	LO	F12
2017-09-27	21:44:00	19	3	A	LO	F14
2017-09-27	22:14:00	12	2	S	LO
2017-09-27	22:18:00	11	2	S	LO
2017-09-27	22:25:00	6	2	A	LO	G1
2017-09-27	22:36:00	4	2	A	LO	R#4
2017-09-27	22:53:00	3	2	A	LO	R#3
2017-09-27	23:17:00	8	2	SF	LO
2017-09-28	04:48:00	14	2	SF	LO
2017-09-28	04:58:00	10	2	A	LO	G3
2017-09-28	05:16:00	1	2	A	LO	R#1
2017-09-28	05:40:00	19	2	A	LO	G5
2017-09-29	05:10:00	18	2	A	LO	G7
2017-09-29	23:06:00	20	2	NA	LO
2017-09-29	23:34:00	11	2	A	LO	G9
2017-09-30	00:45:00	1	2	A	LO	R#4
2017-09-30	01:19:00	11	2	A	LO	G11
2017-09-30	01:37:00	12	2	A	LO	G13
2017-09-30	20:58:00	7	2	A	LO	H2
2017-10-01	01:19:00	17	3	SF	LO
2017-10-01	01:31:00	12	2	A	LO	H4
2017-10-02	20:10:00	17	2	A	LO	H6
2017-10-02	22:22:00	17	3	A	LO	H8
2017-10-02	23:20:00	1	2	A	LO	H10
2017-10-02	23:55:00	14	2	A	LO	R#14
2017-10-03	02:55:00	21	2	S	LO
2017-10-03	05:21:00	25	2	A	LO	R#21
2017-10-03	16:21:00	18	2	S	LO
2017-10-03	18:22:00	21	2	A	LO	H12
2017-10-03	19:00:00	16	1	A	LO	R#15
2017-10-04	14:58:00	22	2	SF	LO
2017-10-04	15:14:00	26	2	A	LO	H14
2017-10-04	16:45:00	20	2	S	LO
2017-10-04	16:45:00	20	2	S	LO
2017-10-04	22:02:00	20	2	A	LO	A2
2017-10-04	22:06:00	20	2	A	LO	R#20
2017-10-04	22:12:00	19	2	A	LO	R#19
2017-10-04	22:23:00	20	2	A	LO	R#20
2017-10-04	22:48:00	18	2	A	LO	R#18
2017-10-04	23:03:00	16	2	A	LO	R#16
2017-10-04	23:04:00	16	2	A	LO	R#15
2017-10-04	23:14:00	15	2	A	LO	R#15
2017-10-04	23:19:00	15	2	A	LO	R#15
2017-10-04	23:19:00	14	2	A	LO	R#14
2017-10-04	23:50:00	12	2	A	LO	R#12
2017-10-04	23:56:00	11	2	A	LO	R#11
2017-10-05	00:04:00	11	2	A	LO	R#11
2017-10-05	00:14:00	11	2	A	Lo	R#11
2017-10-05	00:41:00	16	2	NA	LO
2017-10-05	05:06:00	2	2	A	LO	R#2
2017-10-05	05:40:00	9	2	SF	LO
2017-10-05	05:47:00	11	2	S	LO
2017-10-05	05:52:00	12	2	A	LO	R#12
2017-10-05	06:10:00	15	2	SF	LO
2017-10-05	06:23:00	22	2	A	LO	R#22
2017-10-05	06:39:00	26	1	SF	LO
2017-10-05	06:51:00	27	2	A	LO	R#27
2017-10-05	18:23:00	18	2	NA	LO
2017-10-05	20:08:00	11	2	A	LO	A4
2017-10-05	20:55:00	10	2	SF	LO
2017-10-05	20:58:00	10	3	A	LO	A6
2017-10-05	21:38:00	22	2	A	LO	R#22
2017-10-05	22:09:00	23	1	SF	LO
2017-10-05	23:35:00	22	2	NA	LO
2017-10-05	23:49:00	14	3	NA	LO
2017-10-06	00:29:00	8	2	NA	LO
2017-10-06	01:07:00	11	2	A	LO	R#11
2017-10-06	02:14:00	17	2	NA	LO
2017-10-06	19:30:00	19	3	A	LO	A10
2017-10-06	20:30:00	18	2	A	LO	A8
2017-10-06	23:37:00	21	2	A	LO	A12
2017-10-07	00:53:00	6	2	A	LO	R#6
2017-10-07	01:46:00	16	2	SF	LO
2017-10-08	19:15:00	17	2	A	LO	A14
2017-10-08	21:43:00	25	1	NA	LO
2017-10-09	01:42:00	19	2	A	LO	B1
2017-10-09	02:01:00	21	2	SF	LO
2017-10-09	02:18:00	12	2	S	LO
2017-10-09	02:35:00	2	2	A	LO	B3
2017-10-10	20:11:00	19	2	A	LO	B5
2017-10-10	20:40:00	11	2	A	LO	B7
2017-10-11	02:14:00	23	2	A	LO	B9
2017-10-11	02:25:00	25	2	A	LO	CRIB1
2017-10-11	20:49:00	11	2	SF	LO
2017-10-11	20:53:00	11	2	A	LO	B11
2017-10-11	21:10:00	10	2	A	LO	B13
2017-10-11	21:20:00	7	2	A	LO	CRIB2
2017-10-11	22:29:00	21	2	SF	LO
2017-10-12	05:18:00	16	2	A	LO	C4
2017-10-12	05:33:00	8	2	SF	LO
2017-10-12	05:41:00	4	2	A	LO	C2
2017-10-12	21:30:00	23	1	SF	LO
2017-10-12	21:36:00	22	2	A	LO	C6
2017-10-12	21:59:00	15	2	A	LO	C8
2017-10-12	22:11:00	13	2	S	LO
2017-10-12	22:19:00	8	2	A	LO	C10
2017-10-12	22:26:00	8	2	A	LO	C12
2017-10-12	22:38:00	2	2	A	LO	C14
2017-10-12	23:26:00	19	2	A	LO	D1
2017-10-12	23:50:00	23	2	A	LO	D3
2017-10-13	02:51:00	16	2	SF	LO
2017-10-13	03:14:00	3	2	A	LO	D5
2017-10-13	05:15:00	23	2	A	LO	D7
2017-10-13	22:50:00	12	2	A	LO	CRIB3
2017-10-13	22:59:00	12	2	A	LO	D9
2017-10-13	23:16:00	11	2	A	LO	D11
2017-10-13	23:25:00	10	2	A	LO	D13
2017-10-13	23:44:00	1	2	SF	LO
2017-10-14	00:19:00	10	2	A	LO	E2
2017-10-14	00:43:00	11	2	A	LO	E4
2017-10-14	04:22:00	24	2	A	LO	E6
2017-10-14	04:56:00	14	2	A	LO	E8
2017-10-14	19:56:00	9	2	A	LO	E10
2017-10-14	20:16:00	1	2	A	LO	E12
2017-10-14	20:58:00	0	2	SF	LO
2017-10-14	21:33:00	10	2	A	LO	E14
2017-10-14	23:40:00	22	2	A	LO	F1
2017-10-15	00:05:00	25	2	SF	LO
2017-10-15	00:19:00	20	2	A	LO	F3
2017-10-15	00:50:00	15	2	NA	LO
2017-10-15	01:07:00	9	2	A	LO	F5
2017-10-15	01:15:00	6	2	NA	LO
2017-10-15	01:23:00	2	2	A	LO	R#3
2017-10-15	20:05:00	21	2	A	LO	F7
2017-10-15	21:08:00	12	2	A	LO	R#21
2017-10-15	22:09:00	18	2	A	LO	F9
2017-10-17	02:20:00	17	2	SF	LO
2017-10-17	02:30:00	14	2	A	LO	F11
2017-10-17	02:42:00	13	2	A	LO	F13
2017-10-17	02:54:00	11	2	A	LO	R#12
2017-10-17	03:11:00	4	2	A	LO	R#4
2017-10-17	03:36:00	10	2	A	LO	R#10
2017-10-17	05:36:00	15	2	S	LO
2017-10-17	05:40:00	15	2	D	LO
2017-10-17	05:58:00	9	2	S	LO
2017-10-17	21:40:00	22	2	A	LO	G2
2017-10-17	22:03:00	28	2	S	LO
2017-10-17	22:36:00	15	2	A	LO	R#15
2017-10-17	22:49:00	13	2	A	LO	R#13
2017-10-17	23:02:00	10	2	A	LO	R#10
2017-10-17	23:09:00	9	2	A	LO	R#9
2017-10-18	02:52:00	21	2	A	LO	R#21
2017-10-18	03:26:00	12	2	A	LO	R#12
2017-10-18	23:21:00	11	2	SF	LO
2017-10-19	04:46:00	24	2	A	LO	R#29
2017-10-19	05:40:00	8	2	A	LO	R#10
2017-10-19	23:37:00	23	2	A	LO	G4
2017-10-20	00:14:00	21	2	A	LO	G6
2017-10-20	05:20:00	25	2	A	LO	G8
2017-10-20	21:17:00	12	2	A	LO	G10
2017-10-20	23:43:00	23	2	A	LO	G12
2017-10-21	01:25:00	22	2	A	LO	R#22
2017-10-21	19:03:00	23	2	SF	LO
2017-10-21	19:44:00	21	2	A	LO	R#21
2017-10-21	20:06:00	14	2	A	LO	R#13
2017-10-21	20:38:00	13	2	A	LO	R#12
2017-10-21	20:49:00	12	2	NA	LO
2017-10-21	21:02:00	10	2	A	LO	R#1
2017-10-21	21:17:00	6	2	S	LO	R#1
2017-10-22	01:33:00	21	2	A	LO	R#19
2017-10-22	01:47:00	20	2	SF	LO
2017-10-22	02:00:00	19	2	A	LO	R#19
2017-10-22	05:40:00	11	2	S	LO
2017-10-22	19:52:00	10	2	A	LO	R#10
2017-10-22	20:58:00	14	2	A	LO	R#14
2017-10-22	21:49:00	13	2	SF	LO
2017-10-23	01:21:00	21	2	A	LO	R#21
2017-10-23	02:14:00	3	2	SF	LO
2017-10-23	19:12:00	19	2	SF	LO
2017-10-23	19:28:00	12	2	SF	LO
2017-10-23	19:44:00	5	2	A	LO	R#5
2017-10-23	21:04:00	25	2	A	LO	R#25
2017-10-24	03:06:00	3	2	SF	LO
2017-10-24	20:08:00	12	2	S	LO
2017-10-24	20:27:00	16	2	A	LO	R#16
2017-10-24	20:40:00	19	2	A	LO	R#19
2017-10-25	02:53:00	15	2	SF	LO
2017-10-25	03:05:00	13	1	SF	LO
2017-10-25	03:12:00	13	1	A	LO	R#13
2017-10-25	03:34:00	9	2	A	LO	R#9
2017-10-25	03:53:00	9	2	A	LO	R#9
2017-10-25	20:20:00	28	2	S	LO
2017-10-26	04:52:00	12	2	S	LO
2017-10-26	05:01:00	9	2	S	LO
2017-10-27	02:08:00	17	2	A	LO	R#17
2017-10-27	02:17:00	17	2	S	LO
2017-10-27	23:04:00	17	2	SF	LO
2017-10-28	05:30:00	21	2	A	LO	R#21
2017-10-28	05:42:00	24	2	S	LO
2017-10-28	23:40:00	21	2	S	LO
2017-10-29	19:07:00	24	2	S	LO
2017-10-29	19:48:00	17	2	SF	LO
2017-10-31	04:52:00	3	2	A	LO	R#3
2017-10-31	05:40:00	16	2	A	LO	R#22
2017-11-02	04:22:00	12	2	S	LO
2017-11-03	23:59:00	14	2	NA	LO
2017-11-04	00:10:00	8	1	SF
2017-11-04	01:41:00	21	2	A	LO	R#21
2017-11-04	23:31:00	27	2	A	LO	R#27
2017-11-05	00:14:00	5	2	A	LO	R#5
2017-11-05	00:44:00	3	2	S	LO
2017-11-05	06:03:00	18	3	A	LO	R#17
2017-11-05	16:19:00	22	2	A	Lo	R#22
2017-11-05	16:19:00	22	2	A	LO	R#22
2017-11-06	00:18:00	21	2	A	LO	R#21
2017-11-06	00:39:00	20	2	A	LO	R#20
2017-11-06	01:17:00	5	2	A	LO	R#5
2017-11-06	02:15:00	12	2	NA	LO
2017-11-07	00:09:00	22	3	A	LO	IS
2017-11-07	00:45:00	19	2	A	LO	R#19
2017-11-07	01:09:00	15	2	S	LO
2017-11-07	01:14:00	12	2	A	LO	R#12
2017-11-07	01:49:00	3	2	A	LO	R#3
2017-11-07	06:08:00	15	2	A	LO	R#15
2017-11-08	01:54:00	10	2	SF	LO
2017-11-08	20:04:00	8	2	A	LO	R#8
2017-11-08	21:10:00	16	2	A	LO	R#16
2017-11-09	02:15:00	26	2	A	LO	R#26
2017-11-09	02:49:00	29	2	S	LO
2017-11-09	03:20:00	14	2	SF	LO
2017-11-09	03:25:00	13	2	SF	LO
2017-11-09	03:34:00	11	2	SF	LO
2017-11-09	03:38:00	10	2	A	LO	R#9
2017-11-09	04:07:00	4	2	D	LO
2017-11-09	20:09:00	22	2	A	LO	R#23
2017-11-09	21:03:00	21	2	A	LO	R#21
2017-11-09	21:16:00	20	2	A	LO	R#20
2017-11-09	22:08:00	4	2	A	LO	R#4
2017-11-09	22:39:00	5	2	SF	LO
2017-11-09	23:01:00	19	2	A	LO	R#19
2017-11-10	02:17:00	24	2	A	LO	R#24
2017-11-10	02:42:00	28	2	AD	LO	R#28
2017-11-10	03:23:00	17	2	SF	LO
2017-11-10	03:56:00	11	2	A	LO	R#11
2017-11-10	04:31:00	8	2	A	LO	R#8
2017-11-10	05:12:00	11	2	A	LO	R#11
2017-11-10	19:33:00	19	2	A	LO	R#19
2017-11-10	21:03:00	24	2	A	LO	R#25
2017-11-10	22:01:00	5	2	S	LO
2017-11-10	22:06:00	5	2	S	LO
2017-11-10	23:39:00	28	2	A	LO	R#28
2017-11-11	22:52:00	21	2	A	LO	R#21
2017-11-11	23:24:00	12	2	S	LO
2017-11-11	23:30:00	11	2	SF	LO
2017-11-11	23:35:00	10	2	A	LO	R#10
2017-11-11	23:51:00	6	2	S	LO
2017-11-11	23:58:00	5	2	S	LO
2017-11-12	21:14:00	4	2	A	LO	R#4
2017-11-13	00:52:00	10	2	A	LO	R#10
2017-11-13	04:46:00	15	2	A	LO	R#15
2017-11-13	05:29:00	3	2	AD	LO	R#3
2017-11-13	20:14:00	1	2	A	LO	R#1
2017-11-13	21:28:00	21	2	A	LO	R#21
2017-11-14	00:44:00	22	3	A	LO	IS
2017-11-14	00:48:00	22	3	SF	LO
2017-11-14	01:17:00	5	2	SF	LO
2017-11-14	01:33:00	1	1	A	LO	R#1
2017-11-14	05:10:00	14	2	A	LO	R#15
2017-11-14	05:43:00	11	2	A	LO	R#10
2017-11-14	06:10:00	4	2	A	LO	R#5
2017-11-14	06:22:00	3	2	D	LO
2017-11-14	21:18:00	7	2	SF	LO
2017-11-14	21:39:00	22	2	A	LO	R#22
2017-11-14	22:32:00	10	2	S	LO
2017-11-15	04:59:00	4	2	S	LO
2017-11-15	05:53:00	24	2	AD	LO	R#22
2017-11-15	06:07:00	26	2	S	LO
2017-11-15	21:44:00	21	2	A	LO	R#21
2017-11-15	22:19:00	21	2	A	LO	R#21
2017-11-15	23:18:00	20	2	A	LO	R#20
2017-11-15	23:50:00	21	2	A	LO	R#21
2017-11-16	02:05:00	22	2	A	LO	R#22
2017-11-16	02:53:00	18	2	A	LO	R#18
2017-11-16	03:33:00	4	2	NA	LO
2017-11-16	04:39:00	26	3	A	LO	R#26
2017-11-16	04:56:00	23	2	SF	LO
2017-11-16	07:42:00	28	2	S	LO
2017-11-16	23:04:00	21	2	S	LO
2017-11-16	23:16:00	14	2	S	LO
2017-11-16	23:38:00	1	2	S	LO
2017-11-17	03:12:00	15	2	A	LO	R#15
2017-11-17	23:16:00	21	2	A	LO	R#21
2017-11-18	04:35:00	20	2	S	LO
2017-11-18	05:12:00	6	2	S	LO
2017-11-19	05:02:00	4	2	D	LO
2017-11-20	01:50:00	19	2	A	LO	R#19
2017-11-21	02:20:00	2	2	AD	LO	R#3
2017-11-22	20:30:00	2	2	A	LO	R#2
2017-11-23	03:01:00	9	2	A	LO	R#10
2017-11-24	03:24:00	12	2	SF	LO
2017-11-24	04:14:00	4	2	NA	LO
2017-11-24	04:45:00	9	2	A	LO	R#9
2017-11-24	20:24:00	25	2	A	LO	R#26
2017-11-24	21:06:00	14	2	S	LO
2017-11-24	21:21:00	6	2	SF	LO
2017-11-26	04:37:00	18	2	A	LO	R#18
2017-11-26	04:58:00	12	2	A	LO	R#12
2017-11-26	05:56:00	28	2	AD	LO	R#29
2017-11-26	05:56:00	28	2	D	LO
2017-11-26	22:23:00	21	2	SF	LO
2017-11-26	22:43:00	19	2	AD	LO	R#19
2017-11-26	23:02:00	13	2	S	LO	R#18
2017-11-26	23:21:00	12	2	SF	LO
2017-11-26	23:52:00	5	2	SF	LO
2017-11-27	03:15:00	19	1	S	LO
2017-11-27	23:01:00	1	2	S	LO
2017-11-28	04:31:00	5	2	S	LO
2017-11-28	23:50:00	11	2	A	LO	R#11
2017-11-30	02:47:00	22	2	SF	LO
2017-11-30	20:43:00	24	2	A	LO	R#24
2017-11-30	21:46:00	14	3	A	LO	R#12
2017-12-04	19:54:00	13	2	A	LO	R#13
2017-12-04	20:33:00	3	2	A	LO	R#3
2017-12-05	00:54:00	10	2	AD	LO	R#10
2017-12-05	01:55:00	20	2	A	LO	R#20
2017-12-05	19:56:00	6	2	A	LO	R#7
2017-12-05	20:55:00	12	2	A	LO	R#12
2017-12-05	21:25:00	18	2	S	LO
2017-12-06	01:18:00	14	2	A	LO	R#14
2017-12-06	01:37:00	13	2	A	LO	R#13
2017-12-07	03:46:00	13	2	D	LO
2017-12-07	20:02:00	18	2	A	LO	R#18
2017-12-07	20:36:00	13	2	S	LO
2017-12-07	20:50:00	3	2	A	LO	R#5
2017-12-08	20:57:00	7	2	SF	LO
2017-12-08	21:06:00	3	2	S	LO
2017-12-09	03:23:00	15	2	S	LO
2017-12-09	03:30:00	12	2	S	LO
2017-12-09	21:25:00	7	2	A	LO	R#7
2017-12-09	23:21:00	26	3	D	LO
2017-12-09	23:26:00	28	3	A	LO	R#28
2017-12-11	05:29:00	12	2	S	LO
2017-12-11	05:47:00	25	3	S	LO
2017-12-11	06:35:00	28	3	A	LO	R#28
2017-12-12	19:13:00	28	2	S	LO
2017-12-13	04:48:00	10	2	A	LO	R#10
2017-12-13	05:36:00	18	2	A	LO	R#21

## Sheet: CDO 2018
Date	Time	Sector	Zone	NestingEvent	Species
2018-07-15	04:37:00	22	3	A	LO
2018-07-15	05:14:00	14	3	A	LO
2018-07-15	05:38:00	11	2	SF	LO
2018-07-16	02:24:00	11	2	D	LO
2018-07-16	04:30:00	12	2	D	LO
2018-07-17	02:32:00	2	2	A	LO
2018-07-17	04:27:00	18	2	A	LO
2018-07-17	05:10:00	21	2	A	LO
2018-07-19	23:07:00	10	2	NA	LO
2018-07-20	01:03:00	18	3	A	LO
2018-07-21	22:39:00	7	2	A	LO
2018-07-22	10:53:00	27	2	A	LO
2018-07-22	11:14:00	27	2	SF	LO
2018-07-23	23:40:00	17	3	A	LO
2018-07-23	23:40:00	17	3	NA	LO
2018-07-23	23:40:00	17	3	SF	LO
2018-07-23	00:50:00	21	2	A	LO
2018-07-23	02:05:00	11	2	NA	LO
2018-07-23	02:47:00	15	2	NA	LO
2018-07-23	03:48:00	20	2	NA	LO
2018-07-23	04:10:00	27	2	A	LO
2018-07-25	23:43:00	25	2	A	LO
2018-07-25	01:25:00	25	2	A	LO
2018-07-25	02:00:00	26	3	A	LO
2018-07-26	01:45:00	13	2	A	LO
2018-07-28	23:43:00	13	3	A	LO
2018-07-29	00:10:00	25	3	S	LO
2018-07-30	20:02:00	12	2	A	LO
2018-07-30	20:40:00	20	2	A	LO
2018-08-01	02:15:00	8	3	A	LO
2018-08-01	03:35:00	14	2	A	LO
2018-08-02	19:49:00	6	3	A	LO
2018-08-02	20:27:00	14	3	A	LO
2018-08-02	04:12:00	13	2	AD	LO
2018-08-02	04:55:00	12	3	SF	LO
2018-08-02	05:23:00	4	2	NA	LO
2018-08-02	05:40:00	4	2	A	LO
2018-08-03	21:10:00	11	3	A	LO
2018-08-03	02:11:00	14	2	S	LO
2018-08-03	06:13:00	38	2	D	LO
2018-08-04	21:48:00	20	2	A	LO
2018-08-04	23:11:00	26	2	S	LO
2018-08-04	04:44:00	12	2	A	LO
2018-08-04	05:49:00	32	2	SF	LO
2018-08-04	05:57:00	36	3	SF	LO
2018-08-06	21:46:00	18	2	A	LO
2018-08-06	23:17:00	8	2	A	LO
2018-08-06	23:30:00	1	2	A	LO
2018-08-06	05:05:00	3	2	A	LO
2018-08-07	18:00:00	7	1	M	LO
2018-08-08	22:10:00	15	2	A	LO
2018-08-08	23:58:00	10	2	A	LO
2018-08-08	00:20:00	5	2	A	LO
2018-08-08	00:30:00	5	2	SF	LO
2018-08-08	02:16:00	26	2	A	LO
2018-08-08	02:22:00	26	2	A	LO
2018-08-08	02:39:00	27	2	AD	LO
2018-08-08	02:58:00	25	3	A	LO
2018-08-08	05:41:00	41	2	S	LO
2018-08-09	22:40:00	4	2	A	LO
2018-08-09	00:15:00	24	2	S	LO
2018-08-09	00:50:00	16	3	A	LO
2018-08-09	01:42:00	8	2	A	LO
2018-08-09	04:53:00	38	3	A	LO
2018-08-09	05:00:00	39	2	D	LO
2018-08-11	12:05:00	25	2	S	LO
2018-08-11	00:05:00	2	2	A	LO
2018-08-11	00:20:00	1	2	A	LO
2018-08-11	05:10:00	12	3	A	LO
2018-08-11	06:05:00	14	3	A	LO
2018-08-11	00:00:00	38	1	SF	LO
2018-08-11	01:35:00	23	2	A	LO
2018-08-11	05:10:00	30	2	SF	LO
2018-08-12	00:12:00	24	1	NA	LO
2018-08-12	00:40:00	15	2	NA	LO
2018-08-13	20:30:00	25	2	A	LO
2018-08-13	00:56:00	5	3	A	LO
2018-08-13	01:48:00	14	2	A	LO
2018-08-13	02:30:00	9	2	SF	LO
2018-08-13	02:40:00	2	3	A	LO
2018-08-13	06:05:00	3	3	A	LO
2018-08-14	01:33:00	18	3	A	LO
2018-08-14	02:30:00	19	2	A	LO
2018-08-15	02:05:00	21	2	A	LO
2018-08-16	19:23:00	3	2	A	LO
2018-08-16	20:16:00	9	2	A	LO
2018-08-16	22:53:00	13	3	A	LO
2018-08-16	00:54:00	20	3	SF	LO
2018-08-16	03:34:00	7	2	A	LO
2018-08-16	04:57:00	24	2	A	LO
2018-08-16	05:12:00	25	3	AD	LO
2018-08-17	14:20:00	30	1	M	LO
2018-08-17	00:30:00	6	2	A	LO
2018-08-17	01:20:00	14	2	A	LO
2018-08-18	20:18:00	21	3	A	LO
2018-08-18	23:46:00	2	3	A	LO
2018-08-18	05:25:00	7	2	A	LO
2018-08-19	21:38:00	5	2	NA	LO
2018-08-19	04:35:00	11	2	S	LO
2018-08-20	23:55:00	5	3	A	LO
2018-08-20	05:20:00	11	2	A	LO
2018-08-20	07:30:00	32	2	S	LO
2018-08-20	07:50:00	37	2	D	LO
2018-08-21	23:45:00	29	3	A	LO
2018-08-22	00:54:00	12	3	A	LO
2018-08-22	01:06:00	8	2	A	LO
2018-08-22	01:17:00	6	2	A	LO
2018-08-22	01:17:00	5	2	SF	LO
2018-08-22	01:28:00	5	2	NA	LO
2018-08-22	02:37:00	26	3	A	LO
2018-08-22	06:20:00	38	2	S	LO
2018-08-23	22:30:00	16	2	A	LO
2018-08-23	00:05:00	18	2	A	LO
2018-08-24	00:20:00	22	2	A	LO
2018-08-26	01:40:00	22	3	A	LO
2018-08-27	01:18:00	17	2	S	LO
2018-08-27	02:23:00	24	1	A	LO
2018-08-28	02:10:00	24	3	NA	LO
2018-08-28	02:22:00	27	3	AD	LO
2018-08-29	02:45:00	3	3	A	LO
2018-08-29	02:50:00	2	2	A	LO
2018-08-29	05:10:00	23	3	A	LO
2018-08-29	07:25:00	40	3	D	LO
2018-08-29	07:45:00	37	2	D	LO
2018-08-30	02:35:00	15	3	A	LO
2018-08-31	03:39:00	10	2	A	LO
2018-08-31	04:28:00	27	2	NA	LO
2018-08-31	05:34:00	1	2	A	LO
2018-09-01	03:34:00	4	3	A	LO
2018-09-02	21:10:00	17	3	A	LO
2018-09-02	22:59:00	20	2	A	LO
2018-09-03	21:15:00	23	2	A	LO
2018-09-03	21:35:00	25	3	NA	LO
2018-09-03	23:24:00	20	2	S	LO
2018-09-03	06:35:00	18	2	A	LO
2018-09-03	08:25:00	34	2	NA	LO
2018-09-04	05:10:00	18	3	A	LO
2018-09-04	05:20:00	17	2	M	LO
2018-09-04	06:50:00	47	3	A	LO
2018-09-05	21:38:00	3	2	A	LO
2018-09-05	23:55:00	5	2	A	LO
2018-09-05	02:00:00	23	2	A	LO
2018-09-05	05:46:00	11	2	SF	LO
2018-09-05	05:50:00	43	2	S	LO
2018-09-05	05:55:00	37	2	S	LO
2018-09-06	21:22:00	5	2	A	LO
2018-09-06	22:52:00	11	3	S	LO
2018-09-06	00:40:00	2	2	A	LO
2018-09-06	02:30:00	26	2	SF	LO
2018-09-07	23:05:00	7	2	A	LO
2018-09-07	05:43:00	20	2	A	LO
2018-09-07	06:26:00	2	3	A	LO
2018-09-07	06:35:00	1	2	A	LO
2018-09-08	22:53:00	22	2	A	LO
2018-09-08	00:05:00	12	3	A	LO
2018-09-08	00:55:00	19	3	A	LO
2018-09-08	07:50:00	47	3	S	LO
2018-09-09	00:29:00	19	3	A	LO
2018-09-09	00:47:00	22	2	A	LO
2018-09-09	01:02:00	24	3	NA	LO
2018-09-09	01:04:00	24	3	A	LO
2018-09-09	03:40:00	20	3	A	LO
2018-09-10	23:46:00	15	3	A	LO
2018-09-10	01:27:00	22	2	A	LO
2018-09-10	02:13:00	20	3	A	LO
2018-09-10	05:20:00	23	3	A	LO
2018-09-11	01:47:00	19	2	A	LO
2018-09-11	01:57:00	20	2	SF	LO
2018-09-11	03:46:00	15	3	A	LO
2018-09-12	02:05:00	2	2	A	LO
2018-09-12	02:50:00	3	2	NA	LO
2018-09-12	03:30:00	8	2	AD	LO
2018-09-12	03:49:00	13	2	NA	LO
2018-09-12	04:00:00	14	3	A	LO
2018-09-13	20:30:00	4	2	A	LO
2018-09-13	21:10:00	12	2	A	LO
2018-09-13	02:20:00	21	3	S	LO
2018-09-13	03:26:00	19	2	A	LO
2018-09-13	04:15:00	15	2	A	LO
2018-09-13	04:30:00	10	2	S	LO
2018-09-14	20:20:00	10	3	A	LO
2018-09-14	21:55:00	22	2	A	LO
2018-09-14	02:35:00	5	2	A	LO
2018-09-14	03:00:00	4	2	A	LO
2018-09-14	03:03:00	3	2	S	LO
2018-09-14	03:40:00	21	3	A	LO
2018-09-14	04:25:00	25	2	A	LO
2018-09-14	05:45:00	13	3	A	LO
2018-09-14	05:55:00	20	3	NA	LO
2018-09-15	20:15:00	20	3	A	LO
2018-09-15	19:55:00	6	2	A	LO
2018-09-15	21:05:00	17	2	SF	LO
2018-09-15	22:20:00	18	2	A	LO
2018-09-15	02:51:00	2	3	A	LO
2018-09-15	03:10:00	7	2	S	LO
2018-09-15	03:14:00	11	2	S	LO
2018-09-15	03:20:00	12	3	A	LO
2018-09-15	04:20:00	24	3	NA	LO
2018-09-15	07:35:00	24	3	D	LO
2018-09-16	19:45:00	13	3	A	LO
2018-09-16	21:30:00	2	2	SF	LO
2018-09-16	22:00:00	15	2	S	LO
2018-09-16	22:00:00	15	2	S	LO
2018-09-16	23:46:00	11	2	A	LO
2018-09-16	01:15:00	22	3	A	LO
2018-09-16	02:05:00	38	2	AD	LO
2018-09-16	02:53:00	22	2	A	LO
2018-09-16	03:57:00	10	2	AD	LO
2018-09-16	04:10:00	5	2	SF	LO
2018-09-16	07:00:00	16	3	SF	LO
2018-09-16	09:30:00	26	3	SF	LO
2018-09-17	20:31:00	4	2	A	LO
2018-09-17	23:30:00	10	2	S	LO
2018-09-17	23:40:00	6	2	S	LO
2018-09-17	00:00:00	3	2	S	LO
2018-09-17	00:15:00	2	2	A	LO
2018-09-17	00:20:00	2	2	S	LO
2018-09-17	05:12:00	19	2	S	LO
2018-09-17	05:22:00	12	2	A	LO
2018-09-17	06:37:00	42	2	S	LO
2018-09-18	20:09:00	16	2	A	LO
2018-09-18	20:19:00	10	2	A	LO
2018-09-18	21:03:00	6	2	A	LO
2018-09-18	21:34:00	12	3	A	LO
2018-09-18	23:40:00	13	2	A	LO
2018-09-18	00:48:00	3	3	AD	LO
2018-09-18	01:30:00	10	2	A	LO
2018-09-18	06:50:00	37	2	NA	LO
2018-09-18	06:54:00	37	2	S	LO
2018-09-18	07:08:00	42	2	AD	LO
2018-09-19	20:45:00	4	2	A	LO
2018-09-19	21:12:00	10	2	A	LO
2018-09-19	03:59:00	37	2	S	LO
2018-09-20	20:52:00	25	3	S	LO
2018-09-20	22:37:00	16	3	A	LO
2018-09-20	00:20:00	19	3	A	LO
2018-09-20	01:05:00	24	2	A	LO
2018-09-20	06:36:00	37	2	S	LO
2018-09-20	07:20:00	5	2	S	LO
2018-09-21	01:10:00	2	2	S	LO
2018-09-21	02:43:00	24	3	S	LO
2018-09-22	22:10:00	20	2	S	LO
2018-09-22	01:55:00	23	2	A	LO
2018-09-22	02:25:00	25	2	A	LO
2018-09-23	06:30:00	37	2	D	LO
2018-09-24	00:14:00	10	2	NA	LO
2018-09-24	00:25:00	33	2	A	LO
2018-09-25	01:29:00	1	2	AD	LO
2018-09-25	03:01:00	23	2	A	LO
2018-09-26	23:38:00	16	2	A	LO
2018-09-26	23:58:00	11	2	S	LO
2018-09-26	00:03:00	10	3	D	LO
2018-09-26	00:15:00	3	3	A	LO
2018-09-27	23:11:00	11	2	D	LO
2018-09-27	00:49:00	23	2	A	LO
2018-09-27	16:30:00	18	2	A	LO
2018-09-28	00:15:00	22	2	SF	LO
2018-09-28	01:54:00	17	1	A	LO
2018-09-28	02:06:00	15	2	A	LO
2018-09-30	21:18:00	5	2	A	LO
2018-09-30	21:45:00	1	2	A	LO
2018-09-30	02:35:00	17	2	A	LO
2018-09-30	03:20:00	1	2	SF	LO
2018-10-01	19:50:00	4	3	A	LO
2018-10-01	20:56:00	23	2	A	LO
2018-10-01	21:48:00	20	2	A	LO
2018-10-01	22:32:00	21	3	A	LO
2018-10-01	04:19:00	36	3	NA	LO
2018-10-01	04:25:00	38	2	S	LO
2018-10-02	20:23:00	22	3	A	LO
2018-10-02	23:36:00	4	2	A	LO
2018-10-02	23:54:00	1	2	A	LO
2018-10-02	09:15:00	38	2	D	LO
2018-10-03	21:55:00	2	3	NA	LO
2018-10-03	22:25:00	11	3	A	LO
2018-10-04	21:20:00	16	2	NA	LO
2018-10-04	21:35:00	13	3	A	LO
2018-10-04	22:01:00	12	2	A	LO
2018-10-04	22:05:00	11	2	A	LO
2018-10-04	22:36:00	10	2	S	LO
2018-10-04	22:42:00	9	2	A	LO
2018-10-04	23:00:00	5	2	A	LO
2018-10-04	23:09:00	5	2	A	LO
2018-10-04	23:27:00	4	2	SF	LO
2018-10-04	00:49:00	4	2	A	LO
2018-10-04	00:53:00	4	2	A	LO
2018-10-04	01:00:00	3	3	A	LO
2018-10-04	01:08:00	3	3	A	LO
2018-10-04	01:15:00	2	2	D	LO
2018-10-04	01:18:00	2	2	A	LO
2018-10-04	06:20:00	14	2	S	LO
2018-10-04	06:25:00	13	2	NA	LO
2018-10-04	06:51:00	11	2	SF	LO
2018-10-04	07:30:00	22	3	NA	LO
2018-10-05	21:08:00	21	2	NA	LO
2018-10-05	21:48:00	7	2	NA	LO
2018-10-05	21:55:00	1	2	NA	LO
2018-10-05	23:02:00	12	3	A	LO
2018-10-05	23:50:00	21	3	A	LO
2018-10-05	00:46:00	24	3	A	LO
2018-10-05	23:45:00	19	2	S	LO
2018-10-05	23:30:00	17	2	NA	LO
2018-10-05	21:19:00	26	2	NA	LO
2018-10-05	21:50:00	21	2	A	LO
2018-10-05	22:15:00	20	3	NA	LO
2018-10-05	22:29:00	18	2	A	LO
2018-10-05	22:35:00	17	2	A	LO
2018-10-05	00:00:00	4	2	A	LO
2018-10-05	00:50:00	22	2	A	LO
2018-10-05	01:05:00	23	3	A	LO
2018-10-05	02:52:00	3	2	AD	LO
2018-10-05	07:33:00	33	2	NA	LO
2018-10-05	07:40:00	38	2	D	LO
2018-10-05	07:40:00	38	2	D	LO
2018-10-05	07:50:00	47	1	NA	LO
2018-10-06	23:26:00	28	2	NA	LO
2018-10-06	23:36:00	27	2	SF	LO
2018-10-06	07:15:00	23	3	A	LO
2018-10-06	07:36:00	34	2	NA	LO
2018-10-06	07:44:00	38	2	AD	LO
2018-10-06	08:30:00	5	2	S	LO
2018-10-06	08:35:00	2	2	S	LO
2018-10-07	22:59:00	4	2	A	LO
2018-10-08	21:45:00	19	2	A	LO
2018-10-08	00:39:00	23	2	NA	LO
2018-10-08	01:15:00	10	3	A	LO
2018-10-09	01:02:00	8	2	A	LO
2018-10-09	05:45:00	4	2	A	LO
2018-10-10	00:15:00	24	2	S	LO
2018-10-10	00:30:00	14	3	NA	LO
2018-10-10	01:00:00	5	3	A	LO
2018-10-10	01:55:00	13	3	A	LO
2018-10-10	02:45:00	20	3	S	LO
2018-10-10	05:40:00	2	2	S	LO
2018-10-10	06:30:00	33	3	NA	LO
2018-10-11	00:50:00	10	2	AD	LO
2018-10-11	01:11:00	4	2	A	LO
2018-10-12	03:40:00	4	2	AD	LO
2018-10-12	04:44:00	24	2	A	LO
2018-10-13	03:26:00	4	3	NA	LO
2018-10-13	03:35:00	3	3	SF	LO
2018-10-14	19:25:00	8	2	A	LO
2018-10-14	19:50:00	7	2	SF	LO
2018-10-14	20:35:00	7	2	SF	LO
2018-10-14	20:40:00	11	2	A	LO
2018-10-14	20:46:00	14	2	A	LO
2018-10-14	05:20:00	21	2	A	LO
2018-10-14	05:35:00	20	2	A	LO
2018-10-14	05:38:00	17	1	A	LO
2018-10-15	19:32:00	11	2	A	LO
2018-10-15	02:51:00	10	3	A	LO
2018-10-16	20:04:00	4	2	A	LO
2018-10-16	04:15:00	16	3	S	LO
2018-10-16	04:15:00	16	2	NA	LO
2018-10-16	04:38:00	6	2	NA	LO
2018-10-16	04:43:00	5	2	NA	LO
2018-10-16	05:39:00	38	2	S	LO
2018-10-17	20:50:00	17	3	A	LO
2018-10-17	21:09:00	19	3	NA	LO
2018-10-17	21:50:00	20	2	A	LO
2018-10-17	01:25:00	12	2	A	LO
2018-10-18	20:30:00	15	2	A	LO
2018-10-18	20:54:00	6	2	A	LO
2018-10-18	00:10:00	20	3	A	LO
2018-10-18	01:17:00	22	2	NA	LO
2018-10-18	01:55:00	23	2	NA	LO
2018-10-18	05:30:00	23	2	A	LO
2018-10-18	06:00:00	14	2	A	LO
2018-10-19	21:49:00	17	3	A	LO
2018-10-19	05:05:00	21	2	SF	LO
2018-10-19	05:17:00	14	2	NA	LO
2018-10-19	05:22:00	11	2	S	LO
2018-10-19	06:02:00	22	3	A	LO
2018-10-21	22:20:00	26	2	SF	LO
2018-10-21	00:29:00	12	2	A	LO
2018-10-21	02:25:00	6	2	NA	LO
2018-10-21	02:50:00	2	2	A	LO
2018-10-21	03:37:00	8	2	A	LO
2018-10-21	04:05:00	11	3	SF	LO
2018-10-22	23:20:00	14	3	A	LO
2018-10-22	23:55:00	6	2	AD	LO
2018-10-22	00:05:00	5	2	AD	LO
2018-10-22	00:05:00	5	2	A	LO
2018-10-22	00:28:00	3	2	A	LO
2018-10-22	01:47:00	21	2	A	LO
2018-10-22	02:03:00	17	2	A	LO
2018-10-22	02:25:00	11	2	A	LO
2018-10-23	16:55:00	22	3	A	LO
2018-10-23	21:30:00	25	2	A	LO
2018-10-23	21:29:00	8	2	A	LO
2018-10-23	02:07:00	14	2	S	LO
2018-10-23	03:38:00	23	2	A	LO
2018-10-24	19:57:00	15	2	A	LO
2018-10-24	01:33:00	24	2	A	LO
2018-10-25	08:55:00	15	1	M	LO
2018-10-25	12:30:00	22	1	M	LO
2018-10-25	12:40:00	25	1	M	LO
2018-10-25	19:30:00	2	2	A	LO
2018-10-25	20:35:00	13	2	A	LO
2018-10-25	20:59:00	22	3	A	LO
2018-10-25	23:55:00	16	2	A	LO
2018-10-25	01:20:00	22	2	A	LO
2018-10-27	19:40:00	5	3	SF	LO
2018-10-27	02:47:00	23	3	A	LO
2018-10-28	19:18:00	22	2	A	LO
2018-10-29	19:05:00	21	2	A	LO
2018-10-29	19:35:00	20	2	A	LO
2018-10-29	20:07:00	16	2	SF	LO
2018-10-29	03:47:00	8	2	A	LO
2018-10-29	04:10:00	4	2	AD	LO
2018-10-30	19:35:00	4	3	A	LO
2018-10-30	21:35:00	21	2	A	LO
2018-10-30	22:13:00	22	2	A	LO
2018-10-30	22:25:00	4	2	A	LO
2018-10-31	05:15:00	16	2	A	LO
2018-10-31	05:28:00	12	2	A	LO
2018-10-31	05:36:00	11	2	S	LO
2018-10-31	06:21:00	26	2	SF	LO
2018-10-31	06:21:00	27	2	S	LO
2018-11-01	20:41:00	4	2	A	LO
2018-11-01	21:40:00	11	2	NA	LO
2018-11-01	22:45:00	21	3	A	LO
2018-11-02	00:40:00	6	2	A	LO
2018-11-02	05:03:00	20	2	A	LO
2018-11-02	06:13:00	23	2	S	LO
2018-11-03	20:45:00	18	2	S	LO
2018-11-03	20:51:00	15	2	S	LO
2018-11-03	23:14:00	6	2	A	LO
2018-11-04	22:15:00	13	2	A	LO
2018-11-04	23:20:00	23	2	A	LO
2018-11-04	23:35:00	24	2	A	LO
2018-11-04	01:55:00	22	3	A	LO
2018-11-04	02:05:00	23	3	A	LO
2018-11-04	02:58:00	17	2	A	LO
2018-11-05	22:05:00	1	2	A	LO
2018-11-05	04:10:00	2	2	A	LO
2018-11-06	21:05:00	14	2	NA	LO
2018-11-06	22:10:00	19	3	NA	LO
2018-11-07	21:10:00	18	2	NA	LO
2018-11-07	21:15:00	15	2	SF	LO
2018-11-07	21:30:00	12	2	A	LO
2018-11-07	00:07:00	14	3	A	LO
2018-11-07	00:27:00	4	1	A	LO
2018-11-07	00:40:00	2	2	A	LO
2018-11-07	04:48:00	10	3	D	LO
2018-11-07	05:38:00	23	3	A	LO
2018-11-07	06:19:00	31	3	SF	LO
2018-11-07	06:35:00	41	3	D	LO
2018-11-08	19:45:00	10	2	A	LO
2018-11-08	22:38:00	9	2	SF	LO
2018-11-08	23:38:00	13	3	A	LO
2018-11-08	00:04:00	3	3	A	LO
2018-11-08	05:50:00	15	3	A	LO
2018-11-08	06:27:00	2	2	S	LO
2018-11-09	19:50:00	40	2	SF	LO
2018-11-09	19:58:00	43	2	A	LO
2018-11-09	06:07:00	3	3	D	LO
2018-11-10	20:22:00	22	2	A	LO
2018-11-10	20:55:00	36	2	SF	LO
2018-11-10	00:32:00	5	3	A	LO
2018-11-10	01:38:00	18	2	A	LO
2018-11-10	02:40:00	2	2	A	LO
2018-11-10	03:01:00	12	2	A	LO
2018-11-10	03:35:00	14	2	A	LO
2018-11-11	19:19:00	12	2	A	LO
2018-11-11	19:50:00	4	3	A	LO
2018-11-11	00:45:00	26	3	AD	LO
2018-11-11	00:55:00	27	2	SF	LO
2018-11-11	01:09:00	39	3	SF	LO
2018-11-11	02:11:00	24	3	NA	LO
2018-11-11	04:08:00	4	2	A	LO
2018-11-12	20:28:00	27	2	SF	LO
2018-11-12	23:38:00	28	2	A	LO
2018-11-12	02:22:00	6	2	D	LO
2018-11-12	04:04:00	27	2	D	LO
2018-11-13	19:15:00	19	2	NA	LO
2018-11-13	22:35:00	2	3	S	LO
2018-11-14	20:17:00	15	3	NA	LO
2018-11-14	20:49:00	4	3	NA	LO
2018-11-14	21:49:00	22	2	A	LO
2018-11-14	00:50:00	22	2	A	LO
2018-11-14	05:12:00	24	2	D	LO
2018-11-14	05:25:00	36	2	D	LO
2018-11-14	05:28:00	7	3	S	LO
2018-11-15	19:47:00	6	3	A	LO
2018-11-15	20:35:00	8	3	SF	LO
2018-11-15	23:22:00	19	2	A	LO
2018-11-15	05:21:00	26	2	SF	LO
2018-11-16	19:57:00	5	2	S	LO
2018-11-16	20:04:00	4	2	A	LO
2018-11-16	20:27:00	4	2	A	LO
2018-11-16	23:10:00	22	3	A	LO
2018-11-16	05:28:00	28	2	D	LO
2018-11-17	23:49:00	10	3	A	LO
2018-11-17	00:11:00	15	3	A	LO
2018-11-17	05:26:00	18	2	S	LO
2018-11-17	05:30:00	8	2	S	LO
2018-11-17	05:36:00	33	2	NA	LO
2018-11-17	05:42:00	36	2	D	LO
2018-11-18	00:45:00	2	2	A	LO
2018-11-20	00:54:00	11	2	S	LO
2018-11-21	22:38:00	7	2	S	LO
2018-11-22	20:20:00	12	2	S	LO
2018-11-22	22:16:00	15	3	A	LO
2018-11-22	05:08:00	4	2	A	LO
2018-11-23	19:20:00	21	3	A	LO
2018-11-23	19:34:00	16	2	SF	LO
2018-11-23	19:43:00	21	3	A	LO
2018-11-23	22:20:00	13	3	A	LO
2018-11-23	23:05:00	5	2	A	LO
2018-11-24	20:36:00	17	2	A	LO
2018-11-25	19:39:00	5	2	SF	LO
2018-11-25	20:15:00	7	2	SF	LO
2018-11-26	01:28:00	14	3	A	LO
2018-11-26	01:36:00	14	3	A	LO
2018-11-26	03:15:00	19	2	A	LO
2018-11-26	03:30:00	21	2	A	LO
2018-11-28	20:09:00	18	2	A	LO
2018-11-28	20:36:00	6	3	A	LO
2018-11-28	21:48:00	5	2	NA	LO
2018-11-28	21:50:00	6	2	NA	LO
2018-11-28	22:31:00	21	2	A	LO
2018-11-28	02:54:00	14	3	NA	LO
2018-11-29	19:12:00	16	2	A	LO
2018-11-29	19:31:00	16	2	A	LO
2018-11-29	22:25:00	6	2	A	LO
2018-11-29	05:40:00	30	2	S	LO
2018-11-30	22:29:00	11	2	SF	LO
2018-01-30	05:29:00	15	3	S	LO
2018-01-30	05:50:00	45	2	D	LO
2018-12-01	19:20:00	7	2	A	LO
2018-12-01	19:45:00	7	1	SF	LO
2018-12-01	19:47:00	6	3	A	LO
2018-12-01	21:03:00	22	2	A	LO
2018-12-01	21:25:00	28	2	AD	LO
2018-12-01	23:26:00	13	3	NA	LO
2018-12-05	20:06:00	16	2	SF	LO
2018-12-07	23:55:00	12	2	NA	LO
2018-12-07	06:50:00	23	2	A	LO
2018-12-08	01:29:00	25	2	A	LO
2018-12-08	02:29:00	6	2	SF	LO
2018-12-09	02:04:00	20	2	SF	LO
2018-12-09	03:17:00	1	2	A	LO
2018-12-10	01:38:00	20	2	A	LO
2018-12-10	02:08:00	5	2	A	LO
2018-12-11	03:35:00	6	2	A	LO
2018-12-12	01:17:00	28	1	SF	LO
2018-12-12	01:47:00	13	2	A	LO
2018-12-12	03:45:00	11	1	A	LO
2018-12-14	03:44:00	18	2	A	LO

## Sheet: SM 2012
Date	Time	Sector	Zone	NestingEvent	Species	HatcheryLocation
2012-07-14	21:10:00	11	3	A	LO	A1
2012-07-15	20:40:00	10	3	A	LO	A3
2012-07-15	21:20:00	7	2	A	LO	A5
2012-07-15	22:25:00	4	2	SF	LO
2012-07-16	23:10:00	1	2	A	LO	A7
2012-07-17	02:18:00	15	2	A	LO	A9
2012-07-17	22:14:00	17	3	NA	LO
2012-07-18	01:20:00	12	3	A	LO	A11
2012-07-18	22:25:00	4	2	A	LO	A13
2012-07-19	05:10:00	17	3	SF	LO
2012-07-22	01:37:00	5	3	SF	LO
2012-07-25	01:47:00	5	2	A	LO	B2
2012-07-25	21:04:00	16	2	A	LO	B4
2012-07-25	22:00:00	19	3	SF	LO
2012-07-26	03:20:00	10	2	SF	LO
2012-07-27	20:15:00	12	3	A	LO	B6
2012-07-27	20:40:00	1	2	A	LO	B8
2012-07-28	20:50:00	1		SF	LO
2012-07-28	21:00:00	19		SF	LO
2012-07-28	22:30:00	1	2	A	LO	B10
2012-07-29	00:00:00	8	2	A	LO	B12
2012-07-29	21:50:00	3	2	A	LO	C1
2012-07-30	01:08:00	9	3	A	LO	C7
2012-07-30	21:30:00	4	2	A	LO	C3
2012-07-30	22:25:00	16	2	A	LO	C5
2012-07-31	23:55:00	23	2	A	LO	C11
2012-08-01	00:05:00	10	3	A	LO	C9
2012-08-01	03:10:00	15	2	A	LO	C13
2012-08-01	22:20:00	20	3	A	LO	D1
2012-08-02	23:23:00	15		NA	LO
2012-08-05	02:05:00	6	3	A	LO	D4
2012-08-05	07:55:00	14	3	A	LO	D6
2012-08-07	20:15:00	17	2	A	LO	D8
2012-08-07	23:10:00	3	3	SF	LO
2012-08-08	03:10:00	8	3	S	LO
2012-08-09	22:15:00	4	3	A	LO	D10
2012-08-09	23:40:00	23	3	A	LO	D12
2012-08-10	05:20:00	5	3	?	LO
2012-08-11	20:55:00	17	3	A	LO	E1
2012-08-11	22:10:00	5	2	SF	LO	E3
2012-08-12	00:10:00	10	3	SF	LO
2012-08-12	21:10:00	23	2	A	LO	E5
2012-08-13	21:15:00	19	2	A	LO	E9
2012-08-13	21:30:00	2	2	A	LO	E7
2012-08-14	21:00:00	15	3	A	LO	E11
2012-08-14	21:50:00	25	2	A	LO	E13
2012-08-14	22:41:00	17	2	A	LO	F2
2012-08-14	22:45:00	3	2	NA	LO
2012-08-16	02:50:00	21	3	SF	LO
2012-08-16	03:20:00	7	3	A	LO	F6
2012-08-16	03:29:00	6	3	A	LO	F8
2012-08-16	03:37:00	5	2	A	LO	F10
2012-08-16	03:55:00	1	3	A	LO	F12
2012-08-16	21:20:00	22	2	A	LO	G1
2012-08-16	21:55:00	15	2	A	LO	G3
2012-08-16	23:00:00	13	3	SF	LO
2012-08-16	23:08:00	16	3	SF	LO
2012-08-16	23:15:00	16	3	A	LO	G5
2012-08-17	00:05:00	13	3	A	LO	G7
2012-08-17	01:07:00	19	3	NA	LO
2012-08-17	20:20:00	1	3	A	LO	G9
2012-08-18	23:20:00	15	3	A	LO	G11
2012-08-18	23:40:00	12	3	SF	LO
2012-08-21	01:25:00	1	2	A	LO	G13
2012-08-22	01:50:00	16	2	S	LO
2012-08-22	02:05:00	18	3	A	LO	H2
2012-08-22	22:33:00	15	3	A	LO	H4
2012-08-23	20:10:00			NA	LO
2012-08-24	04:30:00	21	2	A	LO	H6
2012-08-24	21:45:00	8	3	S	LO
2012-08-24	22:00:00	8	2	SF	LO
2012-08-24	22:15:00	3	2	A	LO	H8
2012-08-24	22:30:00	3	3	A	LO	I1
2012-08-24	23:15:00	18	2	A	LO	H10
2012-08-25	01:50:00	10	2	A	LO	H12
2012-08-25	08:35:00	14		A	LO	I3
2012-08-26	02:35:00	3	2	S	LO
2012-08-27	21:40:00	8	3	A	LO	I5
2012-08-27	21:50:00	6	2	A	LO	I7
2012-08-28	00:55:00	18	2	A	LO	I9
2012-08-28	23:10:00	21	2	A	LO	I11
2012-08-29	22:50:00	9	3	A	LO	I13
2012-08-29	23:10:00	5	3	A	LO	A14
2012-08-29	23:25:00	1	3	A	LO	A16
2012-08-29	23:45:00	14	2	A	LO	A18
2012-08-30	00:05:00	16	3	A	LO	A20
2012-08-30	00:15:00	18	3	A	LO	B15
2012-08-30	06:30:00	4	3	S	LO
2012-08-30	06:50:00	10	3	S	LO
2012-08-30	07:00:00	10	3	S	LO
2012-08-30	09:30:00	16	2	S	LO
2012-08-31	03:25:00	13	3	S	LO
2012-08-31	04:45:00	24	3	NA	LO
2012-08-31	23:05:00	9	3	A	LO	B17
2012-09-01	00:55:00	15	3	A	LO	B19
2012-09-01	01:20:00	17	2	A	LO	C14
2012-09-01	01:33:00	19	3	A	LO	C16
2012-09-03	19:45:00	15	3	A	LO	C18
2012-09-04	01:20:00	1		SF	LO
2012-09-05	02:10:00	6		SF	LO
2012-09-05	02:58:00	17	2	A	LO	C20
2012-09-09	05:30:00	5	2	S	LO
2012-09-09	09:30:00	23	3	S	LO
2012-09-10	03:25:00	5	2	A	LO	D15
2012-09-10	03:50:00	5	3	SF	LO
2012-09-10	04:15:00	4	2	A	LO	D17
2012-09-10	04:20:00	3	2	A	LO	D19
2012-09-10	04:40:00	1	3	S	LO
2012-09-10	20:30:00	1	3	A	LO	E14
2012-09-10	21:18:00	19	2	A	LO	E16
2012-09-11	02:35:00	7	2	A	LO	E18
2012-09-11	02:51:00	4	2	A	LO	E20
2012-09-11	03:10:00	1	2	NA	LO
2012-09-12	00:10:00	13	2	A	LO	A2
2012-09-12	01:15:00	17	2	A	LO	A4
2012-09-12	21:12:00	7	2	A	LO	A6
2012-09-12	22:40:00	19	3	A	LO	A8
2012-09-13	02:18:00	1	1	NA	LO
2012-09-14	22:40:00	8	2	A	LO	A10
2012-09-15	00:05:00	10	2	A	LO	A12
2012-09-15	05:55:00	18	3	A	LO	B1
2012-09-15	23:50:00	7	2	A	LO	B3
2012-09-18	21:05:00	10	2	A	LO	B5
2012-09-20	01:50:00	7	2	A	LO	B7
2012-09-20	02:20:00	8	3	A	LO	B9
2012-09-20	02:50:00	19	1	A	LO	B11
2012-09-21	01:40:00	14	2	A	LO	B13
2012-09-21	02:30:00	22	2	A	LO	C2
2012-09-21	02:40:00	19	2	A	LO	C4
2012-09-21	03:10:00	7	1	NA	LO
2012-09-22	03:00:00	19	3	A	LO	C6
2012-09-24	22:20:00	2	2	A	LO	C8
2012-09-25	21:50:00	8	3	S	LO
2012-09-25	23:40:00	22	2	S	LO
2012-09-26	22:40:00	6	2	A	LO	C10
2012-09-27	22:10:00	15	2	A	LO	C12
2012-09-27	22:18:00	16	2	S	LO
2012-09-28	02:35:00	20	3	A	LO	D1
2012-09-28	22:30:00	8	1	SF	LO
2012-09-29	23:20:00	6	2	A	LO	D3
2012-09-30	04:10:00	23	2	A	LO	D5
2012-09-30	04:20:00	23	3	SF	LO
2012-10-01	00:10:00	17	2	A	LO	D7
2012-10-02	1900-09-01	3	3	A	LO	D9
2012-10-03	00:40:00	13	2	A	LO	D11
2012-10-03	02:20:00	22	2	A	LO	D13
2012-10-03	19:37:00	10	2	NA	LO
2012-10-03	20:43:00	17	2	A	LO	E-2
2012-10-04	01:15:00	6	2	A	LO	E8
2012-10-04	01:20:00	22	2	A	LO	E4
2012-10-04	01:30:00	22	2	A	LO	E6
2012-10-04	03:50:00	14	2	A	LO	E10
2012-10-06	02:10:00	8	2	S	LO
2012-10-06	03:30:00	20	2	A	LO	E12
2012-10-06	20:20:00	18	2	A	LO	F1
2012-10-06	21:20:00	1	2	A	LO	F3
2012-10-07	02:20:00	21	2	A	LO	F5
2012-10-07	03:05:00	15	2	A	LO	F7
2012-10-07	04:25:00	2	2	S	LO
2012-10-07	21:05:00	11	2	A	LO	F9
2012-10-07	22:30:00	1	2	A	LO	F11
2012-10-08	19:05:00	10	3	A	LO	H13
2012-10-08	19:21:00	10	2	A	LO	G2
2012-10-08	20:00:00	4	2	A	LO	G4
2012-10-08	20:15:00	17	2	A	LO	G6
2012-10-08	20:50:00	13	2	NA	LO
2012-10-08	22:25:00	23	2	A	LO	G8
2012-10-08	23:30:00	13	2	A	LO	G10
2012-10-09	19:10:00	20	2	A	LO	H1
2012-10-09	19:30:00	2	2	A	LO	G12
2012-10-09	22:30:00	5	2	A	LO	H3
2012-10-10	05:00:00	8	2	S	LO
2012-10-10	20:15:00	18	2	A	LO	H5
2012-10-10	20:30:00	5	2	A	LO	H7
2012-10-10	22:30:00	10	2	A	LO	H9
2012-10-11	22:20:00	20	2	A	LO	H11
2012-10-11	22:55:00	6	2	A	LO	H13
2012-10-11	23:00:00	6	2	A	LO	I2
2012-10-12	02:00:00	4	2	A	LO	I4
2012-10-12	02:45:00	10	2	A	LO	I6
2012-10-12	20:54:00	20	1	A	LO	I8
2012-10-13	00:55:00	5	2	A	LO	I10
2012-10-13	01:05:00	1	2	A	LO	I12
2012-10-13	02:10:00	14	2	A	LO	A15
2012-10-13	02:20:00	16	2	A	LO	A17
2012-10-13	02:31:00	18	2	A	LO	A19
2012-10-13	22:45:00	2	2	A	LO	B14
2012-10-14	00:00:00	19	2	S	LO
2012-10-14	22:45:00	5	1	A	LO	B16
2012-10-14	23:05:00	23	2	S	LO
2012-10-15	22:50:00	10	3	A	LO	B18
2012-10-15	23:40:00	15	2	A	LO	B20
2012-10-16	00:15:00	2	3	SF	LO
2012-10-16	04:15:00	7	2	A	LO	C15
2012-10-16	04:35:00	2	3	A	LO	C17
2012-10-16	07:15:00	14	3	A	LO	C19
2012-10-16	23:10:00	10	2	A	LO	D14
2012-10-17	00:45:00	10	2	A	LO	E15
2012-10-17	01:13:00	24	3	A	LO	D16
2012-10-17	01:30:00	4	2	A	LO	E17
2012-10-17	01:35:00	19	2	A	LO	D18
2012-10-17	01:56:00	15	2	A	LO	D20
2012-10-17	04:40:00	14	3	A	LO	E19
2012-10-17	05:15:00	12	2	A	LO	A1
2012-10-17	05:20:00	11	3	A	LO	A3
2012-10-17	05:25:00	10	3	A	LO	A5
2012-10-17	05:45:00	2	3	SF	LO
2012-10-18	00:40:00	18	2	A	LO	A7
2012-10-18	00:45:00	3	2	A	LO	A11
2012-10-18	00:48:00	18	2	A	LO	A9
2012-10-18	02:20:00	3	2	A	LO	B2
2012-10-18	02:22:00	15	2	A	LO	A13
2012-10-18	02:40:00	1	1	?	LO
2012-10-18	03:05:00	4	2	A	LO	B4
2012-10-18	04:53:00	3	3	A	LO	B6
2012-10-18	04:58:00	4	2	A	LO	B8
2012-10-18	05:10:00	4	3	A	LO	B10
2012-10-19	02:40:00	4	2	A	LO	B12
2012-10-19	03:05:00	17	3	A	LO	C1
2012-10-20	02:23:00	4	3	SF	LO
2012-10-20	02:30:00	1	3	A	LO	C3
2012-10-20	03:15:00	18	2	SF	LO
2012-10-20	03:20:00	18	2	A	LO	C5
2012-10-20	03:35:00	21	2	A	LO	C7
2012-10-20	03:45:00	22	2	A	LO	C9
2012-10-21	03:25:00	10	2	A	LO	C11
2012-10-21	04:40:00	10	2	A	LO	C13
2012-10-21	21:08:00	25	2	A	LO	D2
2012-10-21	22:00:00	1	3	A	LO	D4
2012-10-22	02:40:00	16	2	SF	LO
2012-10-22	02:50:00	20	2	A	LO	D6
2012-10-22	03:10:00	24	2	A	LO	D8
2012-10-22	04:40:00	16	1	NA	LO
2012-10-22	20:35:00	1	2	A	LO	D10
2012-10-23	04:24:00	15	2	A	LO	D12
2012-10-23	05:08:00	5	2	A	LO	E1
2012-10-23	21:35:00	16	2	A	LO	E3
2012-10-23	21:45:00	17	2	A	LO	E5
2012-10-23	22:05:00	22	2	S	LO
2012-10-23	22:45:00	15	2	A	LO	E7
2012-10-23	23:50:00	6	2	A	LO	E9
2012-10-24	00:10:00	5	3	A	LO	E11
2012-10-24	22:00:00	14	2	A	LO	E13
2012-10-24	22:50:00	24	2	A	LO	F2
2012-10-25	23:15:00	19	2	SF	LO
2012-10-26	19:15:00	10	1	SF	LO
2012-10-26	22:35:00	5	3	A	LO	F4
2012-10-27	22:15:00	8	2	A	LO	F6
2012-10-27	22:30:00	5	2	A	LO	F8
2012-10-27	23:55:00	2	2	A	LO	F10
2012-10-30	03:05:00	16	2	A	LO	F12
2012-10-30	03:47:00	16	2	A	LO	G1
2012-10-31	00:25:00	16	2	A	LO	G5
2012-10-31	00:43:00	10	2	A	LO	G3
2012-11-01	19:35:00	8	2	A	LO	G7
2012-11-01	20:30:00	16	2	A	LO
2012-11-01	23:05:00	5	2	A	LO	G9
2012-11-04	03:20:00	20	2	A	LO	G11
2012-11-04	04:20:00	8	2	A	LO	G13
2012-11-04	20:50:00	16	2	A	LO	H2
2012-11-05	02:15:00	7	2	A	LO	H4
2012-11-05	02:42:00	3	2	A	LO	H6
2012-11-05	19:10:00	18	2	A	LO	H10
2012-11-05	19:25:00	1	3	A	LO	H8
2012-11-05	19:35:00	23	2	A	LO	H12
2012-11-05	20:15:00	17	2	A	LO	I1
2012-11-06	04:15:00	4	2	A	LO	I3
2012-11-06	04:40:00	3	2	A	LO	I5
2012-11-06	06:50:00	16	2	S	LO
2012-11-06	22:30:00	14	2	S	LO
2012-11-07	04:38:00	3	2	A	LO	I11
2012-11-07	19:20:00	4	2	A	LO	I7
2012-11-07	20:45:00	16	2	A	LO	I9
2012-11-07	21:45:00	15	2	S	LO
2012-11-08	19:25:00	1	2	A	LO	B19
2012-11-08	20:05:00	11	3	A	LO	I13
2012-11-08	21:15:00	5	2	A	LO	A18
2012-11-08	21:30:00	15	1	A	LO	A14
2012-11-08	21:35:00	2	2	A	LO	A20
2012-11-08	21:35:00	14	2	A	LO	A16
2012-11-08	22:54:00	24	3	SF	LO
2012-11-08	23:14:00	15	2	NA	LO
2012-11-08	23:32:00	10	2	A	LO	B15
2012-11-08	23:55:00	10	2	A	LO	B17
2012-11-09	19:48:00	1	2	A	LO	C14
2012-11-09	20:00:00	18	2	NA	LO
2012-11-09	20:17:00	16	2	S	LO
2012-11-09	21:50:00	1	2	A	LO	C16
2012-11-09	22:35:00	14	2	S	LO
2012-11-10	01:10:00	10	2	A	LO	C18
2012-11-10	01:25:00	6	2	A	LO	C20
2012-11-10	22:00:00	5	2	S	LO
2012-11-11	01:00:00	2	2	A	LO	D15
2012-11-12	22:55:00	3	2	A	LO	D17
2012-11-14	23:20:00	5	2	A	LO	D19
2012-11-15	04:25:00	22	2	A	LO	E14
2012-11-17	01:50:00	20	2	A	LO	E16
2012-11-18	02:20:00	23	2	S	LO
2012-11-18	02:23:00	23	2	S	LO
2012-11-18	02:30:00	0		SF	LO
2012-11-18	04:10:00	21	2	S	LO
2012-11-19	02:18:00	10	2	A	LO	R
2012-11-19	04:02:00	3	2	A	LO	R
2012-11-19	20:20:00	17	3	A	LO	R
2012-11-20	22:10:00	1	2	A	LO	R
2012-11-21	03:26:00	16	2	?	LO
2012-11-21	04:11:00	17	2	A	LO	R
2012-11-21	06:10:00	2	2	S	LO
2012-11-21	20:20:00	4	2	A	LO	R
2012-11-21	20:57:00	13	2	A	LO	R
2012-11-21	21:41:00	15	2	A	LO	R
2012-11-21	22:55:00	1	2	A	LO	R
2012-11-21	23:40:00	18	2	S	LO
2012-11-22	03:55:00	3	2	A	LO	R
2012-11-22	22:10:00	12	2	A	LO	R
2012-11-22	22:30:00	9	2	A	LO	R
2012-11-22	23:00:00	20	2	A	LO	R
2012-11-22	23:00:00	8	2	A	LO	R
2012-11-22	23:20:00	6	2	A	LO	R
2012-11-23	00:00:00	20	2	S	LO
2012-11-23	00:35:00	2	2	A	LO	R
2012-11-25	22:15:00	14	2	A	LO	R
2012-11-26	23:10:00	15	2	S	LO
2012-11-28	03:05:00	1	2	A	LO	R
2012-11-29	00:20:00	8	2	S	LO
2012-11-30	02:07:00	10	2	A	LO	R
2012-11-30	02:35:00	6	2	A	LO	R
2012-11-30	02:40:00	5	2	A	LO	R
2012-11-30	03:00:00	7	2	A	LO	R
2012-12-01	03:00:00	16	2	NA	LO
2012-12-03	03:20:00	21	2	A	LO	R
2012-12-03	04:15:00	9	2	S	LO
2012-12-03	04:20:00	5	2	A	LO	R
2012-12-03	20:00:00	19	2	SF	CM
2012-12-04	03:15:00	12	2	A	LO	R
2012-12-04	03:19:00	16	2	A	LO	R
2012-12-04	04:20:00	5	2	A	LO	R
2012-12-05	19:20:00	8	2	A	LO	R
2012-12-06	04:29:00	22	2	S	LO
2012-12-06	20:37:00	2	2	A	LO	R
2012-12-06	21:14:00	4	2	A	LO	R
2012-12-06	21:24:00	3	2	A	LO	R
2012-12-06	22:40:00	22	2	S	LO
2012-12-07	22:40:00	8	2	A	LO	R
2012-12-07	22:55:00	2	2	A	LO	R
2012-12-07	23:20:00	9	2	NA	LO
2012-12-08	23:15:00	7	2	A	LO	R
2012-12-09	00:45:00	13	2	S	LO
2012-12-11	00:55:00	10	2	A	LO	R
2012-12-12	04:25:00	3	2	A	LO	R
2012-12-12	04:30:00	3	2	A	LO	R
2012-12-12	04:35:00	2	2	A	LO	R
2012-12-12	23:20:00	11	2	A	LO	R
2012-12-13	15:30:00	23	2	A	LO	R

## Sheet: SM 2013
Date	Time	Sector	Zone	NestingEvent	Species	HatcheryLocation
2013-07-02	22:30:00	25	3	A	LO	R
2013-07-06	02:00:00	10	3	A	LO	R
2013-07-08	00:06:00	5	2	NA	LO
2013-07-10	01:36:00	9	3	S	LO
2013-07-13	02:50:00	8	2	SF	LO
2013-07-14	03:48:00	7	2	A	LO	A1
2013-07-19	20:05:00	15	2	A	LO	A3
2013-07-22	03:05:00	5	2	A	LO	A5
2013-07-27	03:07:00	21	1	SF	LO
2013-07-27	20:15:00	22	3	A	LO	A7
2013-07-28	20:24:00	2	2	A	LO	A9
2013-07-29	21:45:00	22	3	A	LO	A11
2013-07-29	22:10:00	21	3	A	LO	A13
2013-07-30	20:45:00	5	3	A	LO	B2
2013-07-30	21:50:00	15	2	A	LO	B4
2013-07-30	22:30:00	3	2	SF	LO
2013-07-31	04:05:00	15	2	A	LO	B6
2013-07-31	04:20:00	17	2	A	LO	B8
2013-07-31	04:55:00	14	1	SF	LO
2013-07-31	21:15:00	5	3	A	LO	B10
2013-07-31	21:15:00	5	3	A	LO	B12
2013-08-01	23:06:00	11	2	A	LO	C1
2013-08-02	00:29:00	24	2	A	LO	C3
2013-08-02	00:29:00	24	2	A	LO	C5
2013-08-02	01:30:00	12	3	SF	LO
2013-08-03	22:00:00	20	2	A	LO	C7
2013-08-03	22:38:00	14	2	A	LO	C9
2013-08-04	02:10:00	6	2	A	LO	C11
2013-08-04	02:42:00	19	3	A	LO	C13
2013-08-04	03:31:00	16	2	A	LO	D2
2013-08-05	02:12:00	14	2	A	LO	D4
2013-08-05	02:20:00	6	3	A	LO	D6
2013-08-05	03:40:00	11	3	A	LO	D8
2013-08-05	23:17:00	6	2	SF	LO
2013-08-05	23:39:00	15	2	A	LO	D10
2013-08-06	00:10:00	21	2	A	LO	D12
2013-08-06	00:50:00	5	3	A	LO	E1
2013-08-06	02:18:00	5	2	A	LO	E3
2013-08-06	02:42:00	5	3	A	LO	E7
2013-08-06	03:20:00	7	3	A	LO	E9
2013-08-07	00:35:00	1	1	SF	LO
2013-08-08	01:10:00	20	2	A	LO	E11
2013-08-09	02:15:00	10	3	A	LO	E5
2013-08-12	20:15:00	8	3	A	LO	F2
2013-08-13	03:06:00	11	3	A	LO	F4
2013-08-13	03:54:00	3	3	A	LO	F6
2013-08-14	03:25:00	2	2	A	LO	F8
2013-08-14	20:20:00	20	3	A	LO	F10
2013-08-14	21:10:00	12	2	A	LO	F12
2013-08-14	22:10:00	12	2	A	LO	G1
2013-08-14	23:00:00	5	2	A	LO	G3
2013-08-16	20:10:00	17	3	A	LO	G5
2013-08-17	23:35:00	8	2	A	LO	G7
2013-08-19	01:20:00	1	3	A	LO	G9
2013-08-19	02:40:00	16	2	A	LO	G11
2013-08-19	03:00:00	20	3	?	LO
2013-08-19	23:00:00	19	2	A	LO	G13
2013-08-21	03:38:00	15	3	A	LO	H2
2013-08-21	03:55:00	16	2	A	LO	H4
2013-08-24	02:08:00	22	3	A	LO	H6
2013-08-24	19:30:00	1	3	A	LO	H8
2013-08-25	01:45:00	21	3	A	LO	H10
2013-08-25	19:18:00	19	2	A	LO	H12
2013-08-26	02:20:00	22	2	A	LO	I1
2013-08-26	02:21:00	4	3	A	LO	I3
2013-08-26	02:31:00	3		SF	LO
2013-08-28	03:30:00	12	2	A	LO	I5
2013-08-29	22:15:00	9	2	A	LO	I7
2013-08-29	22:45:00	10	2	A	LO	I9
2013-08-30	00:24:00	18	2	A	LO	I11
2013-08-30	03:55:00	1	2	SF	LO
2013-08-30	22:30:00	14	2	A	LO	I13
2013-08-30	22:45:00	20	2	A	LO	A14
2013-09-01	21:05:00	10	2	NA	LO
2013-09-03	01:12:00	19	2	A	LO	A16
2013-09-03	23:20:00	22	2	NA	LO
2013-09-03	23:50:00	3	2	A	LO	A18
2013-09-04	02:22:00	3	2	A	LO	B15
2013-09-04	02:35:00	21	2	A	LO	A20
2013-09-04	02:42:00	1	3	SF	LO
2013-09-05	02:04:00	12	2	A	LO	B17
2013-09-05	03:05:00	5	2	A	LO	B19
2013-09-06	04:15:00	22	2	A	LO	C14
2013-09-07	00:40:00	19	2	A	DC	A2
2013-09-07	03:32:00	1	2	A	LO	C18
2013-09-07	04:10:00	12	2	A	LO	C20
2013-09-08	01:10:00	18	2	A	LO	D15
2013-09-08	01:20:00	20	2	A	LO	D17
2013-09-08	01:40:00	25	3	A	LO	D19
2013-09-08	02:20:00	3	1	NA	LO
2013-09-08	20:00:00	23	2	A	LO	E14
2013-09-09	01:15:00	20	3	A	LO	E16
2013-09-09	02:05:00	21	2	A	LO	C16
2013-09-10	02:15:00	18	2	A	LO	E18
2013-09-10	02:45:00	12	2	A	LO	E20
2013-09-10	19:05:00	8	2	A	LO	A4
2013-09-10	20:45:00	18	2	A	LO	A6
2013-09-11	03:25:00	4	2	A	LO	A8
2013-09-11	03:55:00	14	2	A	LO	A10
2013-09-11	21:00:00	13	2	A	LO	A12
2013-09-12	03:00:00	13	3	A	LO	B1
2013-09-12	03:25:00	18	2	A	LO	B3
2013-09-12	04:05:00	10	3	A	LO	B5
2013-09-12	04:20:00	5	3	A	LO	B7
2013-09-12	04:30:00	5	2	A	LO	B9
2013-09-12	04:40:00	4	1	NA	LO
2013-09-12	04:45:00	3	2	A	LO	B11
2013-09-12	04:50:00	0	2	SF	LO
2013-09-12	14:00:00	14	1	SF	LO
2013-09-12	19:15:00	10	3	A	LO	B13
2013-09-12	21:00:00	19	2	A	LO	C2
2013-09-12	21:20:00	18	2	A	LO	C4
2013-09-12	21:40:00	16	2	A	LO	C6
2013-09-12	22:20:00	10	2	A	LO	C8
2013-09-12	23:40:00	24	2	A	LO	C10
2013-09-12	23:51:00	24	2	A	LO	C12
2013-09-13	00:10:00	22	2	A	LO	D1
2013-09-13	03:15:00	22	2	A	LO	D3
2013-09-13	04:05:00	8	3	A	LO	D5
2013-09-13	04:20:00	3	2	A	LO	D7
2013-09-13	04:30:00	6	2	A	LO	D9
2013-09-13	05:00:00	24	3	A	LO	D11
2013-09-13	05:15:00	23	2	A	LO	D13
2013-09-13	19:20:00	19	3	A	LO	E2
2013-09-13	21:05:00	17	2	A	LO	E4
2013-09-13	21:40:00	10	1	NA	LO
2013-09-14	01:15:00	15	2	A	LO	E6
2013-09-14	04:30:00	8	2	NA	LO
2013-09-15	21:55:00	19	2	A	LO	E8
2013-09-15	22:30:00	19	2	A	LO	E10
2013-09-17	01:15:00	11	2	A	LO	F1
2013-09-17	01:30:00	21	2	A	LO	E12
2013-09-17	01:40:00	3	2	A	LO	F3
2013-09-18	02:25:00	20	2	A	LO	F7
2013-09-19	00:10:00	13	2	A	LO	F5
2013-09-19	23:50:00	17	2	S	LO
2013-09-20	01:20:00	18	2	A	LO	F9
2013-09-21	00:54:00	3	2	A	LO	F11
2013-09-22	01:15:00	8	2	A	LO	F13
2013-09-22	01:30:00	4	3	A	LO	G2
2013-09-22	02:50:00	21	2	NA	LO
2013-09-22	03:27:00	23	2	A	LO	G4
2013-09-23	19:20:00	21	2	A	LO	G6
2013-09-23	19:20:00	5	3	A	LO	G12
2013-09-23	19:35:00	24	2	A	LO	G8
2013-09-23	19:55:00	20	2	A	LO	G10
2013-09-23	20:20:00	10	3	A	LO	H3
2013-09-23	20:30:00	14	3	A	LO	H1
2013-09-23	21:20:00	8	2	S	LO
2013-09-24	02:05:00	15	2	S	LO
2013-09-24	02:10:00	13	3	A	LO	H5
2013-09-24	02:15:00	20	3	S	LO
2013-09-24	02:41:00	23	2	S	LO
2013-09-24	02:50:00	9	2	NA	LO
2013-09-24	03:42:00	19	2	S	LO
2013-09-24	19:20:00	19	2	A	LO	H11
2013-09-24	19:20:00	5	2	A	LO	H7
2013-09-24	19:50:00	10	3	A	LO	H9
2013-09-24	20:38:00	21	2	A	LO	H13
2013-09-24	20:50:00	0	2	SF	LO
2013-09-25	02:20:00	19	2	A	LO	I2
2013-09-25	03:30:00	0	2	NA	LO
2013-09-25	20:20:00	16	2	A	LO	I4
2013-09-27	03:55:00	10	2	A	LO	I6
2013-09-28	04:15:00	13	2	A	LO	I8
2013-09-28	04:35:00	6	1	SF	LO
2013-09-29	00:25:00	10	1	NA	LO
2013-09-30	21:20:00	5	1	A	LO	I10
2013-09-30	23:15:00	16	2	A	LO	I12
2013-10-03	23:50:00	15	2	A	LO	A1
2013-10-04	02:20:00	5	3	S	LO
2013-10-04	02:30:00	1	1	A	LO	A15
2013-10-04	03:00:00	16	2	A	LO	A7
2013-10-04	23:15:00	17	2	A	LO	A17
2013-10-04	23:17:00	17	2	A	LO	A19
2013-10-04	23:27:00	19	2	A	LO	B14
2013-10-05	00:28:00	20	3	A	LO	B16
2013-10-05	01:10:00	15	3	A	LO	B18
2013-10-05	01:50:00	10	2	A	LO	B20
2013-10-05	01:50:00	10	2	A	LO	C15
2013-10-05	02:15:00	1	3	A	LO	C17
2013-10-05	05:30:00	11	3	A	LO	C19
2013-10-05	22:30:00	25	2	S	LO
2013-10-05	23:15:00	3	2	SF	LO
2013-10-05	23:25:00	1	2	NA	LO
2013-10-06	00:45:00	16	2	A	LO	D14
2013-10-06	23:10:00	5	2	A	LO	D16
2013-10-06	23:45:00	4	2	A	LO	D18
2013-10-08	20:40:00	10	1	SF	LO
2013-10-09	01:10:00	13	2	A	LO	A3
2013-10-11	02:20:00	5	3	A	LO	D20
2013-10-11	02:30:00	5	3	NA	LO
2013-10-11	03:00:00	5	2	A	LO	E15
2013-10-11	20:05:00	22	2	SF	CM
2013-10-11	21:30:00	4	3	SF	LO
2013-10-11	22:30:00	24	2	A	LO	E17
2013-10-12	04:05:00	2	2	NA	LO
2013-10-12	20:00:00	1	3	A	LO	E19
2013-10-12	22:50:00	9	2	A	LO	A5
2013-10-13	04:20:00	20	3	A	LO	A9
2013-10-13	20:00:00	7	2	A	LO	A11
2013-10-13	22:15:00	8	2	A	LO	A13
2013-10-14	05:15:00	13	2	A	LO	B2
2013-10-15	00:00:00	13	2	A	LO	B4
2013-10-15	00:20:00	4	2	A	LO	B6
2013-10-16	00:25:00	1	3	S	LO
2013-10-16	01:23:00	22	3	A	LO	B8
2013-10-16	21:30:00	20	3	A	LO	B10
2013-10-17	00:00:00	14	1	NA	LO
2013-10-17	01:04:00	1	3	A	LO	B12
2013-10-17	01:50:00	15	2	A	LO	C1
2013-10-17	22:35:00	5	2	NA	LO
2013-10-18	22:41:00	6	3	S	LO
2013-10-19	00:20:00	4	2	A	LO	C3
2013-10-19	19:22:00	3	2	SF	LO
2013-10-20	00:23:00	6	2	S	LO
2013-10-21	00:20:00	10	2	A	LO	C5
2013-10-21	00:30:00	11	2	A	LO	C7
2013-10-21	01:50:00	24	2	A	LO	C9
2013-10-21	02:20:00	13	1	A	LO	C11
2013-10-21	02:45:00	4	3	A	LO	C13
2013-10-21	19:36:00	8	2	A	LO	D2
2013-10-22	03:30:00	3	2	A	LO	D4
2013-10-22	20:00:00	21	3	A	LO	D6
2013-10-22	20:30:00	2	3	A	LO	D8
2013-10-22	20:35:00	1	3	A	LO	D10
2013-10-22	21:35:00	11	3	A	LO	D12
2013-10-23	01:55:00	10	2	A	LO	E1
2013-10-23	02:20:00	2	2	A	LO	E3
2013-10-23	02:55:00	16	2	A	LO	E5
2013-10-23	03:18:00	20	2	A	LO	E9
2013-10-23	19:30:00	7	2	A	LO	E11
2013-10-23	20:00:00	5	2	A	LO	E13
2013-10-24	02:16:00	16	1	NA	LO
2013-10-24	03:10:00	2	2	SF	LO
2013-10-24	20:55:00	18	1	A	LO	F2
2013-10-25	03:25:00	18	2	A	LO	F4
2013-10-25	23:30:00	24	2	A	LO	F6
2013-10-26	23:00:00	3	2	A	LO	F8
2013-10-27	05:20:00	14	2	A	LO	F10
2013-10-27	05:40:00	4	2	S	LO
2013-10-27	06:00:00	1	2	S	LO
2013-10-27	06:30:00	21	2	S	LO
2013-10-27	20:00:00	11	2	A	LO	F12
2013-10-27	22:33:00	12	2	A	LO	G1
2013-10-27	22:55:00	10	2	A	LO	G3
2013-10-27	23:05:00	10	3	A	LO	G5
2013-10-27	23:25:00	6	3	A	LO	G7
2013-10-27	23:35:00	5	2	A	LO	G9
2013-10-28	21:30:00	7	3	A	LO	G11
2013-10-28	22:15:00	16	2	A	LO	G13
2013-10-29	00:21:00	21	2	NA	LO
2013-10-29	05:40:00	23	2	A	LO	H2
2013-10-29	21:00:00	4	2	A	LO	H4
2013-10-29	23:30:00	13	2	A	LO	H6
2013-10-29	23:45:00	5	2	A	LO	H8
2013-10-30	00:50:00	23	2	A	LO	H10
2013-10-31	01:10:00	5	3	A	LO	H12
2013-11-01	02:10:00	15	2	A	LO	I1
2013-11-01	22:20:00	18	2	S	LO
2013-11-01	23:10:00	10	3	S	LO
2013-11-01	23:20:00	10	2	A	LO	I3
2013-11-01	23:50:00	5	3	S	LO
2013-11-02	00:34:00	10	2	A	LO	I5
2013-11-02	00:35:00	21	2	A	LO	I7
2013-11-02	02:55:00	10	2	A	LO	I9
2013-11-02	21:50:00	19	3	A	LO	I11
2013-11-02	22:00:00	24	2	S	LO
2013-11-03	00:10:00	13	3	A	LO	I13
2013-11-03	01:25:00	1	3	A	LO	A4
2013-11-03	01:58:00	2	2	A	LO	A6
2013-11-04	01:20:00	13	2	A	LO	A16
2013-11-04	01:45:00	12	3	A	LO	A14
2013-11-04	04:50:00	11	3	A	LO	A18
2013-11-04	05:10:00	2	2	A	LO	A20
2013-11-04	05:40:00	19	2	A	LO	B15
2013-11-04	05:40:00	21	2	S	LO
2013-11-05	00:10:00	10	2	A	LO	B17
2013-11-05	00:30:00	5	2	A	LO	B19
2013-11-05	02:10:00	19	2	NA	LO
2013-11-05	02:21:00	21	2	SF	LO
2013-11-06	19:40:00	21	2	A	LO	C14
2013-11-06	21:00:00	10	2	A	LO	C16
2013-11-07	20:37:00	6	2	A	LO	E7
2013-11-07	20:50:00	4	2	A	LO	C18
2013-11-07	21:30:00	6	3	A	LO	C20
2013-11-08	02:45:00	1	2	A	LO	D15
2013-11-08	19:30:00	21	3	A	LO	D17
2013-11-09	02:20:00	11	3	A	LO	D19
2013-11-09	03:10:00	3	2	A	LO	E14
2013-11-09	04:30:00	17	2	A	LO	E16
2013-11-09	05:00:00	14	3	NA	LO
2013-11-09	19:10:00	18	2	A	LO	E18
2013-11-10	20:20:00	22	2	S	LO
2013-11-10	22:00:00	10	2	A	LO	E20
2013-11-10	22:50:00	1	3	A	LO	A10
2013-11-10	23:00:00	5	2	A	LO	A2
2013-11-11	00:40:00	19	2	A	LO	A8
2013-11-11	20:20:00	24	2	A	LO	A12
2013-11-12	20:20:00	21	3	S	LO
2013-11-12	21:00:00	18	2	S	LO
2013-11-12	21:45:00	4	3	A	LO	B1
2013-11-13	20:20:00	20	2	A	LO	B3
2013-11-13	22:10:00	8	2	A	LO	B5
2013-11-15	22:40:00	21	2	A	LO	B7
2013-11-16	01:50:00	1	2	A	LO	B9
2013-11-17	01:45:00	19	1	A	LO	R
2013-11-18	19:20:00	15	2	A	LO	R
2013-11-19	01:49:00	24	2	A	LO	R
2013-11-19	02:05:00	6	2	A	LO	R
2013-11-19	19:10:00	17	2	A	LO	R
2013-11-20	01:25:00	23	2	S	LO
2013-11-21	21:25:00	5	3	A	LO	R
2013-11-23	03:14:00	6	2	S	LO
2013-11-23	04:15:00	18	3	S	LO
2013-11-23	10:50:00	9	2	S	LO
2013-11-23	19:45:00	23	2	A	LO	R
2013-11-26	02:00:00	4	2	A	LO	R
2013-11-28	21:20:00	12	2	A	LO	R
2013-11-29	23:10:00	12	2	A	LO	R
2013-11-29	23:22:00	6	1	A	LO	R
2013-11-29	23:46:00	2	2	SF	LO
2013-12-01	00:25:00	5	2	A	LO	R
2013-12-01	01:18:00	5	2	A	LO	R
2013-12-03	23:50:00	16	1	SF	LO
2013-12-04	01:00:00	1	2	A	LO	R
2013-12-04	01:55:00	19	3	A	LO	R
2013-12-04	02:15:00	18	3	A	LO	R
2013-12-04	04:15:00	25	3	A	LO	R
2013-12-05	19:50:00	12	2	S	LO
2013-12-06	01:10:00	11	2	A	LO	R
2013-12-06	02:06:00	18	2	A	LO	R
2013-12-07	02:30:00	1	2	SF	LO
2013-12-07	20:40:00	5	3	A	LO	R
2013-12-07	23:45:00	24	2	A	LO	R
2013-12-09	03:18:00	4	2	A	LO	R
2013-12-10	22:50:00	11	2	A	LO	R
2013-12-12	00:50:00	17	2	A	LO	R

[truncated: 5 more sheets: SM 2014, SM 2015, SM 2016, SM 2017, SM 2018]
